# Supplementary material for: Changes in Susceptibility to Heat During the Summer: A Multicountry Analysis
Source: PubMed Central journal article supplement (PMC4887574; doi:10.1093/aje/kwv260), 2016-05-02
Supplement: supp_kwv260_kwv260supp.pdf [file supp_kwv260_kwv260supp.pdf]

## **Web Appendix**

### **Changes in susceptibility to heat within the summer: a multi- country analysis**

Antonio Gasparrini, Yuming Guo, Masahiro Hashizume, Eric Lavigne, Aurelio Tobias,  
Antonella Zanobetti, Joel D. Schwartz, Michela Leone, Paola Michelozzi, Haidong Kan,  
Shilu Tong, Yasushi Honda, Ho Kim, Ben G. Armstrong

## Web Appendix 1

### Australia

We collected data from Melbourne, Sydney and Brisbane between 1<sup>st</sup> of January 1988 and 31<sup>st</sup> of May 2009. Daily mortality, obtained from the Australian Bureau of Statistics, is represented by counts of deaths for non-external causes only (ICD-9: 0-799; ICD-10: A00-R99). Mean daily temperature (in °C) and relative humidity (in %), computed as the 24-hour average based on hourly measurements, were obtained from the Australian Bureau of Meteorology. We selected all available meteorological stations located within ≤30 km of each city's Central Business District (CBD) (7 stations in Brisbane, 7 stations in Melbourne and 11 stations in Sydney). We calculated the daily averages of climatic variables using all records from meteorological stations in each city. When there was a missing value (≤1.3%) for a particular meteorological station, observations recorded from the remaining weather stations were used to compute the daily average values. These data were used and described in previous publications (1-4).

### Canada

We collected data from 20 census metropolitan areas (CMA) (see full list in Table S1 and in Figure S2 below) and 6 cities (Hamilton, Niagara, Oakville, Oshawa, Sarnia, Sault-Ste Marie) between 1<sup>st</sup> of January 1986 and 31<sup>st</sup> of December 2011. Daily mortality, obtained from Statistics Canada through access to the Canadian Mortality Database, is represented by counts of deaths for all causes. Mean daily temperature (in °C) and relative humidity (in %), computed as the 24-hour average based on hourly measurements, were obtained from Environment Canada. A single weather station was selected for each city using the airport monitoring station located closest to the CMA centre. These data (or a subset of them) were used and described in previous publications (3-6).

### China

We collected data from the city of Anshan (1<sup>st</sup> of January 2004 to 31<sup>st</sup> of December 2006), Beijing (1<sup>st</sup> of January 2007 to 30<sup>th</sup> of September 2008), Fuzhou (1<sup>st</sup> of January 2004 to 31<sup>st</sup> of December 2006), Guangzhou (1<sup>st</sup> of January 2007 to 31<sup>st</sup> of December 2008), Hong Kong (1<sup>st</sup> of January 1996 to 31<sup>st</sup> of December 2002), Hangzhou (1<sup>st</sup> of January 2002 to 29<sup>th</sup> of December 2004), Lanzhou (1<sup>st</sup> of January 2004 to 31<sup>st</sup> of December 2008), Nanjing (1<sup>st</sup> of January 2007 to 31<sup>st</sup> of December 2010), Shanghai (1<sup>st</sup> of January 2001 to 31<sup>st</sup> of December 2004), Shenyang (1<sup>st</sup> of January 2005 to 31<sup>st</sup> of December 2008), Suzhu (1<sup>st</sup> of January 2005 to 31<sup>st</sup> of December 2008), Taiyuan (1<sup>st</sup> of January 2004 to 31<sup>st</sup> of December 2008), Tianjin (1<sup>st</sup> of January 2005 to 31<sup>st</sup> of December 2008), Wuhan (1<sup>st</sup> of January 2003 to 31<sup>st</sup> of December 2005), Wulumqi (1<sup>st</sup> of January 2006 to 31<sup>st</sup> of December 2007), and Xian (1<sup>st</sup> of January 2004 to 31<sup>st</sup> of December 2008). Daily mortality is represented by counts of deaths for non-external causes only (ICD-9: 0-799; ICD-10: A00-R99). Mean daily temperature (in °C) and relative humidity (in %) were computed as the 24-hour average based on hourly measurements. Measures of nitrogen dioxide (NO<sub>2</sub>, in µg/m<sup>3</sup>), particles (PM<sub>10</sub>, in µg/m<sup>3</sup>) and sulphur dioxide (SO<sub>2</sub>, in µg/m<sup>3</sup>) were available in the same period. Daily level of pollutants were computed as the 24-hour mean based on hourly measurements. In total,

missing data amount for 0.54% and 0.33% of the mortality and temperature series, respectively. These data were used and described in previous publications (3).

## **Italy**

We collected data from the city of Bari (1<sup>st</sup> of January 1996 to 31<sup>st</sup> of December 2007), Bologna (1<sup>st</sup> of January 1996 to 31<sup>st</sup> of December 2010), Brescia (1<sup>st</sup> of January 1993 to 31<sup>st</sup> of December 2003), Civitavecchia (1<sup>st</sup> of January 1996 to 31<sup>st</sup> of December 2006), Frosinone (1<sup>st</sup> of January 1995 to 31<sup>st</sup> of December 2006), Genova (1<sup>st</sup> of January 1999 to 31<sup>st</sup> of December 2007), Latina (1<sup>st</sup> of January 1995 to 31<sup>st</sup> of December 2006), Palermo (1<sup>st</sup> of January 1997 to 31<sup>st</sup> of December 2001), Roma (1<sup>st</sup> of January 1987 to 31<sup>st</sup> of December 2010), Torino (1<sup>st</sup> of January 1991 an to 1<sup>st</sup> of December 1999), and Viterbo (1<sup>st</sup> of January 1995 to 1<sup>st</sup> of December 2006). Daily mortality, obtained from local mortality registries and from the rapid mortality surveillance system operational since 2004, is represented by counts of deaths for all causes. Mean daily temperature (in °C) and relative humidity (in %), computed as the 24-h average based on 6-h measurements, were obtained from the Meteorological Service of the Italian Air Force. A single weather station was selected for each city, using the airport monitoring station located closest to the city centre. In total, missing data amount for 1.95% and 3.30% of the mortality and temperature series, respectively. These data were used and described in previous publications (3, 7, 8).

## **Japan**

We collected data from 47 prefectures (see full list in Table S1 and in Figure S2 below) between 1<sup>st</sup> of January 1985 and 31<sup>st</sup> of December 2012. Daily mortality, obtained from computerized death certificate data from the Ministry of Health, Labour and Welfare, Japan, is represented by counts of deaths for all causes and for non-external causes only (ICD-9: 0-799; ICD-10: A00-R99). Mean daily temperature (in °C) and relative humidity (in %), computed as the 24-hour average based on hourly measurements, were obtained from the Japan Meteorology Agency. A single weather station located within the urban area of the capital city was selected for each prefecture. These data were used and described in previous publications (3, 4).

## **South Korea**

We collected data from 7 cities (see full list in Table S1 and in Figure S2 below) between 1<sup>st</sup> of January 1992 and 31<sup>st</sup> of December 2010. Daily mortality is represented by counts of deaths for all causes and for non-external causes only (ICD-9: 0-799; ICD-10: A00-R99). Mean daily temperature (in °C) and relative humidity (in %) were computed as the 24-hour average based on hourly measurements. Daily level of pollutants were computed as the 24-hour mean based on hourly measurements. These data were used and described in previous publications (3, 4).

## **Spain**

We collected data from the 51 capital cities (see full list in Table S1 and in Figure S2 below) between 1<sup>st</sup> of January 1990 and 31<sup>st</sup> of December 2010. Daily mortality, obtained from Spain National Institute of Statistics, is represented by counts of deaths for all causes. Mean daily

temperature (in °C), computed as the 24-hour average based on hourly measurements, was obtained from Spain National Meteorology Agency. A single weather station, located within the urban area or at the near airport, was selected for each city. Single-day missing values were imputed as the average of the days before and after. For periods longer than two days no imputation was done. These data (or a subset of them) were used and described in previous publications (3, 4, 9).

## **UK**

We collected data in 9 regions of England and in Wales (see full list in Table S1 and in Figure S2 below) between 1<sup>st</sup> of January 1990 and 30<sup>st</sup> of August 2012. Daily mortality, obtained from the Office of National Statistics, is represented by counts of deaths for all causes and for non-external causes only (ICD-9: 0-799; ICD-10: A00-R99). Mean daily temperature (in °C, computed from the 24-h average of hourly measurements) were obtained from the British Atmospheric Data Centre. An average of 29 stations contributed data to each regional series, from a minimum of 7 in London to a maximum of 44 in Wales. Missing values were imputed through interpolation between stations within the same region. A subset of these data were used and described in previous publications (3, 4, 10, 11).

## **USA**

We collected data from 135 cities (see full list in Table S1 and in Figure S2 below) between 1<sup>st</sup> of January 1985 and 31<sup>st</sup> of December 2006. Daily mortality, obtained from the National Center for Health Statistics (NCHS), is represented by counts of deaths for non-external causes only (ICD-9: 0-799; ICD-10: A00-R99). Mean daily temperature (in °C, computed as the 24-hour average based on hourly measurements) and relative humidity (in %, computed from the 24-h average of hourly measurements of dew point temperature) were obtained from the National Climatic Data Center (NCDC) of the National Oceanic and Atmospheric Administration (NOAA). A single weather station was selected for each city in the land-based station data or NCDC, based on the proximity to the city's population centre. In 6 cities where multiple observations were missing from all the nearby monitors, hourly data from the Integrated Surface Database Lite of NCDC were converted in daily values. For 25 stations missing dew point data, dew point data were obtained from the nearest station with dew point data. These data were used and described in previous publications (3, 4, 12, 13).

**Web Table 1.** List of the 305 locations in 9 countries with study periods, total number of deaths and summer temperature (mean and range).

| <i>Location</i>           | <i>Country</i> | <i>Period</i> | <i>Total deaths</i> | <i>Summer temperature (°C)</i> |
|---------------------------|----------------|---------------|---------------------|--------------------------------|
| <b>BRISBANE</b>           | Australia      | 1988-2009     | 58836               | 24.2 (17.4 to 31.4)            |
| <b>MELBOURNE</b>          | Australia      | 1988-2009     | 140400              | 20.0 (10.6 to 35.0)            |
| <b>SYDNEY</b>             | Australia      | 1988-2009     | 161899              | 22.2 (14.0 to 31.8)            |
| <b>ABBOTSFORD</b>         | Canada         | 1986-2011     | 8572                | 17.0 (8.9 to 29.0)             |
| <b>CALGARY</b>            | Canada         | 1986-2011     | 42293               | 14.3 (-2.5 to 24.3)            |
| <b>EDMONTON</b>           | Canada         | 1986-2011     | 49262               | 15.3 (0.4 to 29.4)             |
| <b>HALIFAX</b>            | Canada         | 1986-2011     | 22407               | 16.9 (5.2 to 26.6)             |
| <b>HAMILTON</b>           | Canada         | 1986-2011     | 35884               | 18.9 (4.2 to 29.6)             |
| <b>KINGSTON</b>           | Canada         | 1986-2011     | 12362               | 18.8 (4.5 to 29.5)             |
| <b>KITCHENER-WATERLOO</b> | Canada         | 1986-2011     | 22176               | 17.9 (3.6 to 29.8)             |
| <b>LONDON ONTARIO</b>     | Canada         | 1986-2011     | 30429               | 18.9 (4.3 to 30.7)             |
| <b>MONTREAL</b>           | Canada         | 1986-2009     | 79813               | 18.9 (3.3 to 29.3)             |
| <b>NIAGARA</b>            | Canada         | 1986-2011     | 30931               | 19.9 (6.2 to 30.5)             |
| <b>OAKVILLE</b>           | Canada         | 1986-2011     | 18543               | 19.4 (5.7 to 31.1)             |
| <b>OSHAWA</b>             | Canada         | 1986-2011     | 22707               | 18.3 (4.4 to 30.2)             |
| <b>OTTAWA</b>             | Canada         | 1986-2011     | 43017               | 18.7 (2.9 to 29.7)             |
| <b>REGINA</b>             | Canada         | 1986-2011     | 15797               | 16.3 (0.0 to 31.4)             |
| <b>SARNIA</b>             | Canada         | 1986-2011     | 8874                | 19.5 (6.0 to 30.7)             |
| <b>SUDBURY</b>            | Canada         | 1986-2011     | 13079               | 16.8 (1.2 to 28.8)             |
| <b>SAINT JOHN NB</b>      | Canada         | 1986-2011     | 13676               | 15.3 (4.0 to 25.7)             |
| <b>ST. JOHN'S NFL</b>     | Canada         | 1986-2011     | 17001               | 14.0 (1.2 to 24.3)             |
| <b>SAULT STE. MARIE</b>   | Canada         | 1986-2011     | 9327                | 16.4 (3.4 to 27.7)             |
| <b>SASKATOON</b>          | Canada         | 1986-2011     | 18102               | 15.8 (-1.4 to 32.1)            |
| <b>THUNDER BAY</b>        | Canada         | 1986-2011     | 11437               | 15.3 (0.9 to 27.3)             |
| <b>TORONTO</b>            | Canada         | 1986-2011     | 215163              | 19.6 (5.3 to 31.5)             |
| <b>VICTORIA</b>           | Canada         | 1986-2011     | 26457               | 15.7 (6.7 to 26.7)             |
| <b>VANCOUVER</b>          | Canada         | 1986-2011     | 103396              | 16.7 (9.2 to 28.4)             |
| <b>WINDSOR</b>            | Canada         | 1986-2011     | 20264               | 21.0 (6.0 to 31.5)             |
| <b>WINNIPEG</b>           | Canada         | 1986-2011     | 53136               | 17.2 (1.1 to 30.9)             |
| <b>ANSHAN</b>             | China          | 2004-2006     | 9404                | 24.2 (10.1 to 36.4)            |
| <b>BEIJING</b>            | China          | 2007-2008     | 24718               | 25.0 (12.5 to 30.7)            |
| <b>FUZHOU</b>             | China          | 2004-2006     | 5422                | 28.0 (20.3 to 32.2)            |
| <b>GUANGZHOU</b>          | China          | 2007-2008     | 17633               | 28.8 (23.7 to 33.5)            |
| <b>HONG KONG</b>          | China          | 1996-2002     | 67289               | 28.4 (21.1 to 33.8)            |
| <b>HANGZHOU</b>           | China          | 2002-2004     | 6370                | 26.9 (17.7 to 36.4)            |
| <b>LANZHOU</b>            | China          | 2004-2008     | 10552               | 17.6 (7.0 to 33.0)             |
| <b>SHANGHAI</b>           | China          | 2001-2004     | 51408               | 27.1 (19.4 to 34.0)            |
| <b>SHENYANG</b>           | China          | 2005-2008     | 30197               | 21.6 (10.0 to 28.0)            |
| <b>SUZHU</b>              | China          | 2005-2008     | 14563               | 27.0 (17.5 to 33.8)            |
| <b>TAIYUAN</b>            | China          | 2004-2008     | 13454               | 22.0 (9.9 to 30.5)             |
| <b>TIANJIN</b>            | China          | 2005-2008     | 4814                | 25.1 (12.2 to 31.3)            |
| <b>WUHAN</b>              | China          | 2003-2005     | 17896               | 27.6 (18.1 to 35.8)            |

|                      |       |           |        |                     |
|----------------------|-------|-----------|--------|---------------------|
| <b>WULUMQI</b>       | China | 2006-2007 | 4048   | 22.1 (7.3 to 32.6)  |
| <b>XIAN</b>          | China | 2004-2008 | 13807  | 23.4 (10.0 to 32.0) |
| <b>BARI</b>          | Italy | 1996-2007 | 9487   | 23.4 (11.9 to 35.2) |
| <b>BOLOGNA</b>       | Italy | 1996-2010 | 17787  | 23.8 (9.6 to 32.3)  |
| <b>BRESCIA</b>       | Italy | 1993-2003 | 6664   | 22.2 (10.9 to 31.9) |
| <b>CIVITAVECCHIA</b> | Italy | 1996-2006 | 1169   | 23.9 (16.1 to 30.3) |
| <b>FROSINONE</b>     | Italy | 1995-2006 | 996    | 23.3 (12.6 to 31.6) |
| <b>GENOA</b>         | Italy | 1999-2007 | 21779  | 23.2 (11.6 to 32.5) |
| <b>LATINA</b>        | Italy | 1995-2006 | 2532   | 23.6 (13.2 to 31.7) |
| <b>PALERMO</b>       | Italy | 1997-2001 | 8009   | 24.9 (15.2 to 37.8) |
| <b>ROME</b>          | Italy | 1987-2010 | 159066 | 23.2 (12.4 to 31.1) |
| <b>TURIN</b>         | Italy | 1991-1999 | 20441  | 20.6 (9.3 to 27.9)  |
| <b>VITERBO</b>       | Italy | 1995-2006 | 1898   | 22.3 (10.6 to 32.7) |
| <b>AICHI</b>         | Japan | 1985-2012 | 383746 | 25.5 (15.5 to 32.7) |
| <b>AKITA</b>         | Japan | 1985-2012 | 101267 | 22.0 (12.1 to 31.6) |
| <b>AOMORI</b>        | Japan | 1985-2012 | 113976 | 20.4 (10.6 to 30.1) |
| <b>CHIBA</b>         | Japan | 1985-2012 | 313873 | 24.4 (13.1 to 32.2) |
| <b>EHIME</b>         | Japan | 1985-2012 | 116503 | 25.6 (16.6 to 31.9) |
| <b>FUKUSHIMA</b>     | Japan | 1985-2012 | 154544 | 22.8 (11.3 to 31.4) |
| <b>FUKUI</b>         | Japan | 1985-2012 | 58665  | 24.5 (14.6 to 32.1) |
| <b>FUKUOKA</b>       | Japan | 1985-2012 | 324858 | 25.8 (17.5 to 32.4) |
| <b>GIFU</b>          | Japan | 1985-2012 | 136903 | 25.5 (15.6 to 32.9) |
| <b>GUNMA</b>         | Japan | 1985-2012 | 135317 | 24.1 (12.6 to 32.6) |
| <b>HOKKAIDO</b>      | Japan | 1985-2012 | 389479 | 19.6 (9.8 to 30.1)  |
| <b>HIROSHIMA</b>     | Japan | 1985-2012 | 194391 | 25.7 (15.6 to 32.7) |
| <b>HYOGO</b>         | Japan | 1985-2012 | 354299 | 25.7 (16.2 to 32.0) |
| <b>IBARAKI</b>       | Japan | 1985-2012 | 189316 | 22.8 (11.6 to 31.3) |
| <b>ISHIKAWA</b>      | Japan | 1985-2012 | 80735  | 24.3 (15.0 to 32.3) |
| <b>IWATE</b>         | Japan | 1985-2012 | 107927 | 20.8 (10.4 to 29.3) |
| <b>KAGAWA</b>        | Japan | 1985-2012 | 76721  | 25.8 (16.9 to 32.3) |
| <b>KANAGAWA</b>      | Japan | 1985-2012 | 430516 | 24.3 (13.1 to 30.9) |
| <b>KAGOSHIMA</b>     | Japan | 1985-2012 | 146568 | 26.7 (18.5 to 31.1) |
| <b>KOCHI</b>         | Japan | 1985-2012 | 70061  | 25.6 (15.8 to 32.1) |
| <b>KUMAMOTO</b>      | Japan | 1985-2012 | 134895 | 26.1 (16.2 to 31.5) |
| <b>KYOTO</b>         | Japan | 1985-2012 | 170793 | 25.7 (15.1 to 32.8) |
| <b>MIE</b>           | Japan | 1985-2012 | 127223 | 25.3 (15.9 to 33.5) |
| <b>MIYAGI</b>        | Japan | 1985-2012 | 142635 | 21.6 (10.8 to 31.2) |
| <b>MIYAZAKI</b>      | Japan | 1985-2012 | 84538  | 25.8 (16.7 to 32.0) |
| <b>NAGANO</b>        | Japan | 1985-2012 | 159353 | 22.6 (11.9 to 30.7) |
| <b>NAGASAKI</b>      | Japan | 1985-2012 | 115970 | 25.7 (17.4 to 32.2) |
| <b>NARA</b>          | Japan | 1985-2012 | 87912  | 24.5 (14.6 to 31.7) |
| <b>NIIGATA</b>       | Japan | 1985-2012 | 184269 | 23.7 (14.4 to 32.6) |
| <b>OITA</b>          | Japan | 1985-2012 | 94400  | 25.2 (16.2 to 31.6) |
| <b>OKAYAMA</b>       | Japan | 1985-2012 | 140908 | 25.9 (15.9 to 32.3) |
| <b>OKINAWA</b>       | Japan | 1985-2012 | 68982  | 28.1 (21.1 to 31.1) |
| <b>OSAKA</b>         | Japan | 1985-2012 | 526314 | 26.3 (15.5 to 32.9) |

|                    |             |           |        |                     |
|--------------------|-------------|-----------|--------|---------------------|
| <b>SAGA</b>        | Japan       | 1985-2012 | 65842  | 25.8 (16.0 to 32.2) |
| <b>SAITAMA</b>     | Japan       | 1985-2012 | 343311 | 24.4 (12.9 to 33.7) |
| <b>SHIGA</b>       | Japan       | 1985-2012 | 77718  | 24.6 (15.1 to 31.4) |
| <b>SHIMANE</b>     | Japan       | 1985-2012 | 65113  | 24.2 (15.0 to 32.2) |
| <b>SHIZUOKA</b>    | Japan       | 1985-2012 | 234281 | 24.9 (14.6 to 31.9) |
| <b>TOKUSHIMA</b>   | Japan       | 1985-2012 | 66168  | 25.6 (16.9 to 32.3) |
| <b>TOCHIGI</b>     | Japan       | 1985-2012 | 130789 | 23.3 (12.0 to 31.4) |
| <b>TOKYO</b>       | Japan       | 1985-2012 | 710556 | 25.0 (13.2 to 33.1) |
| <b>TOTTORI</b>     | Japan       | 1985-2012 | 48663  | 24.5 (14.5 to 32.3) |
| <b>TOYAMA</b>      | Japan       | 1985-2012 | 84518  | 23.9 (15.1 to 33.8) |
| <b>WAKAYAMA</b>    | Japan       | 1985-2012 | 85859  | 25.8 (16.9 to 31.9) |
| <b>YAMAGATA</b>    | Japan       | 1985-2012 | 99932  | 22.3 (12.0 to 31.1) |
| <b>YAMAGUCHI</b>   | Japan       | 1985-2012 | 124916 | 25.0 (13.9 to 31.2) |
| <b>YAMANASHI</b>   | Japan       | 1985-2012 | 61561  | 24.4 (14.7 to 31.8) |
| <b>BUSAN</b>       | South Korea | 1992-2010 | 107590 | 23.3 (16.1 to 30.2) |
| <b>DAEGU</b>       | South Korea | 1992-2010 | 65670  | 24.4 (15.5 to 32.9) |
| <b>DAEJEON</b>     | South Korea | 1992-2010 | 32897  | 23.6 (13.0 to 31.8) |
| <b>GWANGJU</b>     | South Korea | 1992-2010 | 34231  | 24.2 (15.7 to 31.3) |
| <b>INCHEON</b>     | South Korea | 1992-2010 | 62066  | 23.0 (13.5 to 31.4) |
| <b>SEOUL</b>       | South Korea | 1992-2010 | 228164 | 23.7 (13.0 to 33.0) |
| <b>ULSAN</b>       | South Korea | 1992-2010 | 17677  | 23.6 (15.1 to 30.8) |
| <b>A CORUNA</b>    | Spain       | 1990-2010 | 23135  | 18.9 (13.0 to 29.0) |
| <b>ALBACETE</b>    | Spain       | 1990-2010 | 10495  | 23.0 (10.7 to 31.6) |
| <b>ALICANTE</b>    | Spain       | 1990-2010 | 15634  | 24.7 (17.3 to 32.2) |
| <b>ALMERIA</b>     | Spain       | 1990-2010 | 12709  | 25.2 (17.2 to 36.2) |
| <b>AVILA</b>       | Spain       | 1990-2010 | 6736   | 19.0 (6.4 to 28.6)  |
| <b>BADAJOS</b>     | Spain       | 1990-2010 | 11335  | 24.7 (15.1 to 33.9) |
| <b>BARCELONA</b>   | Spain       | 1990-2010 | 110440 | 23.0 (14.2 to 30.9) |
| <b>BILBAO</b>      | Spain       | 1990-2010 | 24210  | 19.7 (11.9 to 32.2) |
| <b>BURGOS</b>      | Spain       | 1990-2010 | 13026  | 18.1 (6.6 to 29.8)  |
| <b>CACERES</b>     | Spain       | 1990-2010 | 6682   | 24.5 (13.6 to 34.1) |
| <b>CADIZ</b>       | Spain       | 1990-2010 | 12588  | 23.8 (16.8 to 32.9) |
| <b>CASTELLON</b>   | Spain       | 1990-2010 | 12557  | 24.4 (14.8 to 32.0) |
| <b>CEUTA</b>       | Spain       | 1990-2010 | 3069   | 23.7 (14.9 to 32.8) |
| <b>CORDOBA</b>     | Spain       | 1990-2010 | 21505  | 26.3 (15.7 to 36.3) |
| <b>CIUDAD REAL</b> | Spain       | 1990-2010 | 6933   | 24.7 (11.9 to 33.7) |
| <b>CUENCA</b>      | Spain       | 1990-2010 | 5159   | 21.6 (9.2 to 29.8)  |
| <b>GIRONA</b>      | Spain       | 1990-2010 | 9619   | 22.0 (12.3 to 30.4) |
| <b>GRANADA</b>     | Spain       | 1990-2010 | 23194  | 24.0 (12.8 to 32.7) |
| <b>GUADALAJARA</b> | Spain       | 1990-2010 | 6275   | 21.5 (10.0 to 29.0) |
| <b>HUELVA</b>      | Spain       | 1990-2010 | 13142  | 24.5 (15.8 to 36.2) |
| <b>HUESCA</b>      | Spain       | 1990-2010 | 4824   | 22.2 (11.3 to 32.0) |
| <b>JAEN</b>        | Spain       | 1990-2010 | 11011  | 25.2 (13.1 to 35.3) |
| <b>LEON</b>        | Spain       | 1990-2010 | 13663  | 18.2 (7.4 to 27.9)  |
| <b>LLEIDA</b>      | Spain       | 1990-2010 | 11309  | 23.4 (12.4 to 30.6) |
| <b>LOGRONO</b>     | Spain       | 1990-2010 | 10081  | 21.4 (9.5 to 31.5)  |

|                                |       |           |        |                     |
|--------------------------------|-------|-----------|--------|---------------------|
| <b>LUGO</b>                    | Spain | 1990-2010 | 10413  | 17.4 (7.9 to 29.1)  |
| <b>MADRID</b>                  | Spain | 1990-2010 | 171802 | 23.6 (10.8 to 32.4) |
| <b>MALAGA</b>                  | Spain | 1990-2010 | 35549  | 24.8 (16.4 to 34.2) |
| <b>MELILLA</b>                 | Spain | 1990-2010 | 2699   | 24.5 (17.5 to 36.1) |
| <b>MURCIA</b>                  | Spain | 1990-2010 | 23245  | 24.5 (17.5 to 36.1) |
| <b>OURENSE</b>                 | Spain | 1990-2010 | 11763  | 21.5 (10.4 to 31.5) |
| <b>OVIEDO</b>                  | Spain | 1990-2010 | 21508  | 18.1 (10.0 to 28.4) |
| <b>PAMPLONA</b>                | Spain | 1990-2010 | 17661  | 20.0 (9.1 to 31.6)  |
| <b>PALMAS G. CANARIA</b>       | Spain | 1990-2010 | 26984  | 23.8 (19.0 to 33.4) |
| <b>PALMA MALLORCA</b>          | Spain | 1990-2010 | 25347  | 23.6 (15.3 to 32.1) |
| <b>PONTEVEDRA</b>              | Spain | 1990-2010 | 9707   | 19.6 (11.6 to 30.4) |
| <b>SALAMANCA</b>               | Spain | 1990-2010 | 13985  | 19.8 (9.6 to 29.1)  |
| <b>SANTANDER</b>               | Spain | 1990-2010 | 17796  | 19.3 (12.5 to 27.8) |
| <b>TENERIFE</b>                | Spain | 1990-2010 | 16084  | 24.7 (20.0 to 34.3) |
| <b>SEGOVIA</b>                 | Spain | 1990-2010 | 5424   | 20.3 (7.5 to 31.4)  |
| <b>SEVILLA</b>                 | Spain | 1990-2010 | 52635  | 26.9 (17.0 to 36.8) |
| <b>SORIA</b>                   | Spain | 1990-2010 | 4055   | 18.7 (7.0 to 28.1)  |
| <b>SAN SEBASTIAN</b>           | Spain | 1990-2010 | 20326  | 18.4 (10.9 to 30.3) |
| <b>TARRAGONA</b>               | Spain | 1990-2010 | 8439   | 25.0 (14.2 to 32.4) |
| <b>TERUEL</b>                  | Spain | 1990-2010 | 3844   | 20.2 (8.8 to 27.8)  |
| <b>TOLEDO</b>                  | Spain | 1990-2010 | 9639   | 24.7 (11.3 to 34.0) |
| <b>VALENCIA</b>                | Spain | 1990-2010 | 63401  | 24.8 (14.3 to 33.8) |
| <b>VITORIA</b>                 | Spain | 1990-2010 | 11721  | 18.0 (7.8 to 30.6)  |
| <b>VALLADOLID</b>              | Spain | 1990-2010 | 20582  | 20.7 (9.6 to 30.9)  |
| <b>ZAMORA</b>                  | Spain | 1990-2010 | 6435   | 21.1 (10.4 to 30.8) |
| <b>ZARAGOZA</b>                | Spain | 1990-2010 | 43127  | 23.7 (13.3 to 32.9) |
| <b>EAST</b>                    | UK    | 1990-2012 | 362868 | 16.1 (7.5 to 25.2)  |
| <b>EAST MIDLANDS</b>           | UK    | 1990-2012 | 293288 | 15.5 (6.2 to 25.3)  |
| <b>LONDON</b>                  | UK    | 1990-2012 | 401709 | 17.2 (9.2 to 29.1)  |
| <b>NORTH EAST</b>              | UK    | 1990-2012 | 197506 | 14.5 (6.0 to 25.0)  |
| <b>NORTH WEST</b>              | UK    | 1990-2012 | 515728 | 14.9 (7.5 to 23.7)  |
| <b>SOUTH EAST</b>              | UK    | 1990-2012 | 546649 | 16.2 (8.3 to 25.3)  |
| <b>SOUTH WEST</b>              | UK    | 1990-2012 | 374222 | 15.6 (8.5 to 24.8)  |
| <b>WALES</b>                   | UK    | 1990-2012 | 228091 | 15.1 (8.1 to 24.0)  |
| <b>WEST MIDLANDS</b>           | UK    | 1990-2012 | 372152 | 15.4 (6.8 to 25.0)  |
| <b>YORKSHIRE &amp; HUMBER</b>  | UK    | 1990-2012 | 362345 | 15.2 (7.0 to 26.1)  |
| <b>AKRON, OH</b>               | USA   | 1985-2006 | 33295  | 20.3 (6.4 to 30.8)  |
| <b>ALBUQUERQUE, NM</b>         | USA   | 1985-2006 | 22151  | 23.8 (9.7 to 32.2)  |
| <b>ALLENTOWN-BETHLEHEM, PA</b> | USA   | 1985-2006 | 18616  | 21.2 (6.9 to 31.4)  |
| <b>ATLANTA, GA</b>             | USA   | 1985-2006 | 96303  | 25.4 (11.7 to 32.5) |
| <b>ATLANTIC CITY, NJ</b>       | USA   | 1985-2006 | 15199  | 22.1 (8.1 to 32.2)  |
| <b>AUSTIN, TX</b>              | USA   | 1985-2006 | 21831  | 28.4 (14.2 to 35.0) |
| <b>BAKERSFIELD, CA</b>         | USA   | 1985-2006 | 27716  | 26.5 (14.2 to 36.7) |
| <b>BALTIMORE, MD</b>           | USA   | 1985-2006 | 99401  | 23.2 (9.7 to 32.5)  |
| <b>BARNSTABLE-</b>             | USA   | 1985-2006 | 16153  | 19.5 (7.8 to 30.6)  |



|                                           |     |           |        |                     |
|-------------------------------------------|-----|-----------|--------|---------------------|
| <b>YARMOUTH, MA</b>                       |     |           |        |                     |
| <b>BERGEN-PASSAIC, NJ</b>                 | USA | 1985-2006 | 73212  | 23.4 (10.6 to 34.7) |
| <b>BIRMINGHAM, AL</b>                     | USA | 1985-2006 | 53165  | 25.6 (13.1 to 32.2) |
| <b>BOSTON, MA</b>                         | USA | 1985-2006 | 145615 | 20.9 (7.5 to 32.2)  |
| <b>BATON ROUGE, LA</b>                    | USA | 1985-2006 | 19473  | 27.2 (14.4 to 32.8) |
| <b>BROWNSVILLE, TX</b>                    | USA | 1985-2006 | 10965  | 28.9 (17.5 to 33.1) |
| <b>BUFFALO, NY</b>                        | USA | 1985-2006 | 65843  | 19.8 (5.8 to 30.3)  |
| <b>CANTON-<br/>MASSILLON, OH</b>          | USA | 1985-2006 | 23766  | 20.3 (6.4 to 30.8)  |
| <b>CHARLESTON, WV</b>                     | USA | 1985-2006 | 15363  | 22.3 (8.1 to 31.7)  |
| <b>CHARLOTTE, NC</b>                      | USA | 1985-2006 | 25311  | 24.8 (11.7 to 32.5) |
| <b>CHATTANOOGA, TN</b>                    | USA | 1985-2006 | 18913  | 25.0 (12.8 to 32.8) |
| <b>CHICAGO, IL</b>                        | USA | 1985-2006 | 349050 | 21.1 (5.6 to 33.6)  |
| <b>CINCINNATI, OH</b>                     | USA | 1985-2006 | 53094  | 22.7 (9.2 to 33.1)  |
| <b>CLEVELAND, OH</b>                      | USA | 1985-2006 | 125455 | 20.7 (7.5 to 30.8)  |
| <b>COLUMBIA, SC</b>                       | USA | 1985-2006 | 23635  | 26.2 (13.3 to 32.8) |
| <b>COLUMBUS, OH</b>                       | USA | 1985-2006 | 49586  | 22.0 (8.3 to 31.7)  |
| <b>DALLAS, TX</b>                         | USA | 1985-2006 | 81635  | 28.1 (12.2 to 35.8) |
| <b>DAYTONA BEACH, FL</b>                  | USA | 1985-2006 | 33248  | 27.1 (21.1 to 31.7) |
| <b>DAYTON, OH</b>                         | USA | 1985-2006 | 33728  | 21.7 (7.2 to 32.2)  |
| <b>DENVER, CO</b>                         | USA | 1985-2006 | 56583  | 20.7 (-5.0 to 30.3) |
| <b>DES MOINES, IA</b>                     | USA | 1985-2006 | 16899  | 22.0 (4.7 to 32.8)  |
| <b>DETROIT, MI</b>                        | USA | 1985-2006 | 229193 | 21.0 (6.4 to 31.4)  |
| <b>DUTCHESS COUNTY,<br/>NY</b>            | USA | 1985-2006 | 13143  | 20.2 (6.4 to 31.7)  |
| <b>EL PASO, TX</b>                        | USA | 1985-2006 | 22366  | 26.8 (11.4 to 36.7) |
| <b>ERIE, PA</b>                           | USA | 1985-2006 | 16916  | 20.3 (7.5 to 30.0)  |
| <b>FLINT, MI</b>                          | USA | 1985-2006 | 23674  | 19.6 (4.7 to 30.8)  |
| <b>FRESNO, CA</b>                         | USA | 1985-2006 | 31852  | 26.3 (13.6 to 38.6) |
| <b>FT. LAUDERDALE, FL</b>                 | USA | 1985-2006 | 97450  | 27.4 (23.1 to 30.8) |
| <b>FORT MYERS-CAPE<br/>CORAL, FL</b>      | USA | 1985-2006 | 27339  | 28.2 (22.8 to 31.4) |
| <b>FORT PIERCE-PORT<br/>ST. LUCIE, FL</b> | USA | 1985-2006 | 20681  | 27.3 (22.8 to 30.8) |
| <b>FORT WORTH-<br/>ARLINGTON, TX</b>      | USA | 1985-2006 | 53579  | 28.0 (13.1 to 35.6) |
| <b>GALVESTON, TX</b>                      | USA | 1985-2006 | 12921  | 27.1 (16.7 to 32.8) |
| <b>GARY, IN</b>                           | USA | 1985-2006 | 28345  | 20.9 (5.3 to 31.7)  |
| <b>GRAND RAPIDS, MI</b>                   | USA | 1985-2006 | 24572  | 19.9 (4.4 to 31.7)  |
| <b>GREENSBORO, NC</b>                     | USA | 1985-2006 | 20318  | 23.7 (11.1 to 30.6) |
| <b>GREENVILLE, SC</b>                     | USA | 1985-2006 | 17982  | 24.5 (11.7 to 32.8) |
| <b>HAMILTON, OH</b>                       | USA | 1985-2006 | 15447  | 22.7 (9.2 to 33.1)  |
| <b>HARRISBURG-<br/>CARLISLE, PA</b>       | USA | 1985-2006 | 15600  | 22.6 (8.1 to 32.5)  |
| <b>HARTFORD, CT</b>                       | USA | 1985-2006 | 48290  | 20.8 (5.8 to 31.1)  |
| <b>HONOLULU, HI</b>                       | USA | 1985-2006 | 24364  | 27.5 (24.2 to 30.3) |
| <b>HOUSTON, TX</b>                        | USA | 1985-2006 | 115796 | 28.0 (15.3 to 33.3) |
| <b>INDIANAPOLIS, IN</b>                   | USA | 1985-2006 | 46853  | 22.3 (7.8 to 32.2)  |
| <b>JACKSONVILLE, FL</b>                   | USA | 1985-2006 | 38724  | 27.0 (17.8 to 32.5) |

|                                          |     |           |        |                     |
|------------------------------------------|-----|-----------|--------|---------------------|
| <b>JERSEY CITY, NJ</b>                   | USA | 1985-2006 | 31701  | 23.4 (10.6 to 34.7) |
| <b>KANSAS CITY, MO-KS</b>                | USA | 1985-2006 | 67807  | 23.5 (6.1 to 33.9)  |
| <b>KNOXVILLE, TN</b>                     | USA | 1985-2006 | 24834  | 24.1 (10.8 to 30.3) |
| <b>LAKELAND-WINTER HAVEN, FL</b>         | USA | 1985-2006 | 29250  | 27.9 (21.4 to 32.2) |
| <b>LANCASTER, PA</b>                     | USA | 1985-2006 | 24548  | 21.7 (8.9 to 31.1)  |
| <b>LANSING, MI</b>                       | USA | 1985-2006 | 11583  | 19.4 (5.3 to 30.8)  |
| <b>LAS VEGAS, NV-AZ</b>                  | USA | 1985-2006 | 56467  | 30.7 (14.7 to 41.1) |
| <b>LOS ANGELES, CA</b>                   | USA | 1985-2006 | 382554 | 20.4 (13.6 to 31.1) |
| <b>LOUISVILLE, KY</b>                    | USA | 1985-2006 | 42618  | 24.2 (10.0 to 34.2) |
| <b>LITTLE ROCK, AR</b>                   | USA | 1985-2006 | 19999  | 26.4 (13.3 to 35.3) |
| <b>LUBBOCK, TX</b>                       | USA | 1985-2006 | 10691  | 25.2 (6.4 to 35.6)  |
| <b>MADISON, WI</b>                       | USA | 1985-2006 | 15106  | 19.7 (5.0 to 32.8)  |
| <b>MCALLEN-EDINBURG-MISSION, TX</b>      | USA | 1985-2006 | 15090  | 29.9 (16.7 to 36.7) |
| <b>MELBOURNE-TITUSVILLE-PALM BAY, FL</b> | USA | 1985-2006 | 27810  | 27.2 (21.9 to 31.9) |
| <b>MEMPHIS, TN</b>                       | USA | 1985-2006 | 47476  | 26.5 (13.6 to 33.9) |
| <b>MIAMI, FL</b>                         | USA | 1985-2006 | 119487 | 28.5 (23.3 to 31.4) |
| <b>MIDDLESEX, NJ</b>                     | USA | 1985-2006 | 33829  | 21.8 (8.6 to 32.5)  |
| <b>MILWAUKEE, WI</b>                     | USA | 1985-2006 | 71799  | 20.3 (6.1 to 33.9)  |
| <b>MINNEAPOLIS-ST. PAUL, MN</b>          | USA | 1985-2006 | 74244  | 20.4 (4.7 to 32.5)  |
| <b>MOBILE, AL</b>                        | USA | 1985-2006 | 22679  | 26.8 (15.0 to 32.8) |
| <b>MONMOUTH-OCEAN, NJ</b>                | USA | 1985-2006 | 73356  | 21.8 (8.1 to 31.9)  |
| <b>MYRTLE BEACH, SC</b>                  | USA | 1985-2006 | 9518   | 25.6 (14.7 to 33.3) |
| <b>NAPLES, FL</b>                        | USA | 1985-2006 | 11336  | 28.0 (21.9 to 30.8) |
| <b>NASHUA, NH</b>                        | USA | 1985-2006 | 15701  | 19.4 (6.1 to 30.0)  |
| <b>NASHVILLE, TN</b>                     | USA | 1985-2006 | 30097  | 24.9 (11.1 to 32.5) |
| <b>NASSAU-SUFFOLK, NY</b>                | USA | 1985-2006 | 143694 | 21.4 (8.6 to 32.2)  |
| <b>NEWARK, NJ</b>                        | USA | 1985-2006 | 68728  | 23.4 (10.6 to 34.7) |
| <b>NEWBURGH, NY</b>                      | USA | 1985-2006 | 15476  | 20.6 (6.7 to 30.8)  |
| <b>NEW HAVEN-MERIDEN, CT</b>             | USA | 1985-2006 | 48273  | 20.8 (5.8 to 31.1)  |
| <b>NEW LONDON, CT</b>                    | USA | 1985-2006 | 12576  | 20.7 (7.8 to 31.1)  |
| <b>NEW YORK, NY</b>                      | USA | 1985-2006 | 426430 | 23.4 (10.3 to 34.4) |
| <b>OAKLAND, CA</b>                       | USA | 1985-2006 | 99888  | 18.1 (12.2 to 27.5) |
| <b>OCALA, FL</b>                         | USA | 1985-2006 | 17933  | 27.2 (19.4 to 32.2) |
| <b>OKLAHOMA CITY, OK</b>                 | USA | 1985-2006 | 36601  | 25.7 (7.5 to 34.7)  |
| <b>OMAHA, NE</b>                         | USA | 1985-2006 | 22024  | 22.3 (2.2 to 33.3)  |
| <b>ORANGE COUNTY, CA</b>                 | USA | 1985-2006 | 98795  | 22.4 (14.4 to 32.8) |
| <b>ORLANDO, FL</b>                       | USA | 1985-2006 | 49272  | 27.8 (21.9 to 32.2) |
| <b>PENSACOLA, FL</b>                     | USA | 1985-2006 | 16165  | 27.3 (16.9 to 34.2) |
| <b>PHILADELPHIA, PA-NJ</b>               | USA | 1985-2006 | 279833 | 23.5 (9.4 to 33.3)  |

|                                             |     |           |        |                     |
|---------------------------------------------|-----|-----------|--------|---------------------|
| <b>PHOENIX, AZ</b>                          | USA | 1985-2006 | 117774 | 33.2 (18.9 to 41.4) |
| <b>PITTSBURGH, PA</b>                       | USA | 1985-2006 | 97477  | 20.9 (7.8 to 30.3)  |
| <b>PORTLAND, ME</b>                         | USA | 1985-2006 | 14093  | 18.5 (5.0 to 29.7)  |
| <b>PORTLAND, OR</b>                         | USA | 1985-2006 | 65670  | 19.4 (10.6 to 29.7) |
| <b>PROVIDENCE-FALL RIVER, RI-MA</b>         | USA | 1985-2006 | 11215  | 20.9 (7.2 to 31.4)  |
| <b>PUNTA GORDA, FL</b>                      | USA | 1985-2006 | 11663  | 28.0 (23.1 to 32.2) |
| <b>RALEIGH, NC</b>                          | USA | 1985-2006 | 18149  | 24.5 (12.5 to 32.2) |
| <b>READING, PA</b>                          | USA | 1985-2006 | 22163  | 24.5 (12.5 to 32.2) |
| <b>RIVERSIDE-SAN BERNARDINO, CA</b>         | USA | 1985-2006 | 134247 | 25.1 (12.2 to 36.7) |
| <b>ROCHESTER, NY</b>                        | USA | 1985-2006 | 39921  | 19.6 (5.0 to 30.3)  |
| <b>ROCKFORD, IL</b>                         | USA | 1985-2006 | 14176  | 20.7 (4.7 to 31.7)  |
| <b>SACRAMENTO, CA</b>                       | USA | 1985-2006 | 53242  | 23.1 (13.3 to 34.7) |
| <b>SAGINAW, MI</b>                          | USA | 1985-2006 | 12524  | 19.6 (5.3 to 31.1)  |
| <b>SALINAS, CA</b>                          | USA | 1985-2006 | 14338  | 17.3 (12.2 to 25.8) |
| <b>SALT LAKE CITY, UT</b>                   | USA | 1985-2006 | 27783  | 22.8 (5.6 to 32.8)  |
| <b>SAN ANTONIO, TX</b>                      | USA | 1985-2006 | 57736  | 28.4 (12.8 to 34.2) |
| <b>SARASOTA-BRADENTON, FL</b>               | USA | 1985-2006 | 46351  | 28.0 (20.6 to 32.8) |
| <b>SCRANTON--WILKES-BARRE--HAZLETON, PA</b> | USA | 1985-2006 | 46123  | 20.0 (5.8 to 31.9)  |
| <b>SAN DIEGO, CA</b>                        | USA | 1985-2006 | 115049 | 20.9 (14.7 to 30.8) |
| <b>SEATTLE, WA</b>                          | USA | 1985-2006 | 69921  | 17.5 (8.9 to 28.1)  |
| <b>SAN FRANCISCO, CA</b>                    | USA | 1985-2006 | 77042  | 17.6 (11.9 to 30.0) |
| <b>SHREVEPORT, LA</b>                       | USA | 1985-2006 | 16221  | 27.2 (13.6 to 34.2) |
| <b>SAN JOSE, CA</b>                         | USA | 1985-2006 | 54245  | 21.0 (13.9 to 32.2) |
| <b>SPOKANE, WA</b>                          | USA | 1985-2006 | 21294  | 18.3 (4.4 to 30.6)  |
| <b>SPRINGFIELD, MA</b>                      | USA | 1985-2006 | 29030  | 20.8 (5.8 to 31.1)  |
| <b>STAMFORD-NORWALK, CT</b>                 | USA | 1985-2006 | 43691  | 21.5 (8.6 to 30.8)  |
| <b>ST. LOUIS, MO-IL</b>                     | USA | 1985-2006 | 96368  | 24.6 (9.2 to 33.6)  |
| <b>STOCKTON-LODI, CA</b>                    | USA | 1985-2006 | 25244  | 23.8 (13.9 to 36.9) |
| <b>SYRACUSE, NY</b>                         | USA | 1985-2006 | 26252  | 19.8 (5.0 to 30.3)  |
| <b>TACOMA, WA</b>                           | USA | 1985-2006 | 29688  | 17.8 (10.0 to 26.7) |
| <b>TAMPA-ST. PETERSBURG-CLEARWATER, FL</b>  | USA | 1985-2006 | 49811  | 28.0 (21.7 to 31.7) |
| <b>TOLEDO, OH</b>                           | USA | 1985-2006 | 28669  | 20.9 (6.9 to 31.7)  |
| <b>TRENTON, NJ</b>                          | USA | 1985-2006 | 17869  | 21.6 (7.8 to 31.7)  |
| <b>TUCSON, AZ</b>                           | USA | 1985-2006 | 39643  | 29.5 (18.6 to 37.2) |
| <b>TULSA, OK</b>                            | USA | 1985-2006 | 29746  | 26.1 (8.6 to 35.3)  |
| <b>UTICA-ROME, NY</b>                       | USA | 1985-2006 | 16479  | 19.0 (4.4 to 28.9)  |
| <b>VENTURA COUNTY, CA</b>                   | USA | 1985-2006 | 27134  | 18.9 (13.1 to 26.4) |
| <b>VIRGINIA BEACH, VA</b>                   | USA | 1985-2006 | 58165  | 24.9 (13.9 to 33.1) |
| <b>WASHINGTON, DC-MD-VA</b>                 | USA | 1985-2006 | 44237  | 24.4 (10.6 to 33.9) |
| <b>WICHITA, KS</b>                          | USA | 1985-2006 | 21215  | 24.9 (5.0 to 33.9)  |

|                                            |     |           |       |                     |
|--------------------------------------------|-----|-----------|-------|---------------------|
| <b>WILMINGTON, DE</b>                      | USA | 1985-2006 | 23455 | 22.8 (9.2 to 31.9)  |
| <b>WORCESTER, MA</b>                       | USA | 1985-2006 | 41347 | 19.0 (3.3 to 28.9)  |
| <b>WEST PALM BEACH-<br/>BOCA RATON, FL</b> | USA | 1985-2006 | 72824 | 28.0 (23.3 to 31.1) |
| <b>YORK, PA</b>                            | USA | 1985-2006 | 19280 | 22.0 (8.3 to 31.1)  |
| <b>YOUNGSTOWN-<br/>WARREN, OH</b>          | USA | 1985-2006 | 26632 | 19.6 (6.4 to 30.6)  |

## Web Appendix 2

The analysis of the multi-country data set was performed in R, version 3.2.1.(14) The first and second-stage models were performed using the two packages `dlnm` (version 2.1.4) and `mymeta` (version 0.4.7), respectively (15, 16).

The R code and data reproducing all the steps of the analysis are provided in a single zipped file as Supplemental Material on the Journal's website. An update version is also available at the personal web page of the first author (<http://www.ag-myresearch.com/>), and at the time of writing can be accessed via the sections 'Publications' (through the link to this article) or 'R code'. The code will be updated consistently with the development of the two R packages.

The code consists of a series of scripts to be run consecutively. Although the full results cannot be reproduced as most of the data are not publicly available, we provide a subset of the dataset for the 10 regions of the UK used in the analysis. We anticipate that the results are similar yet not identical to those reported in the article, as the latter are based on the full data and a different dataset for the UK.

**Web Figure 1.** Replication of Figure 2 in the manuscript, including colours and confidence intervals as shaded areas.

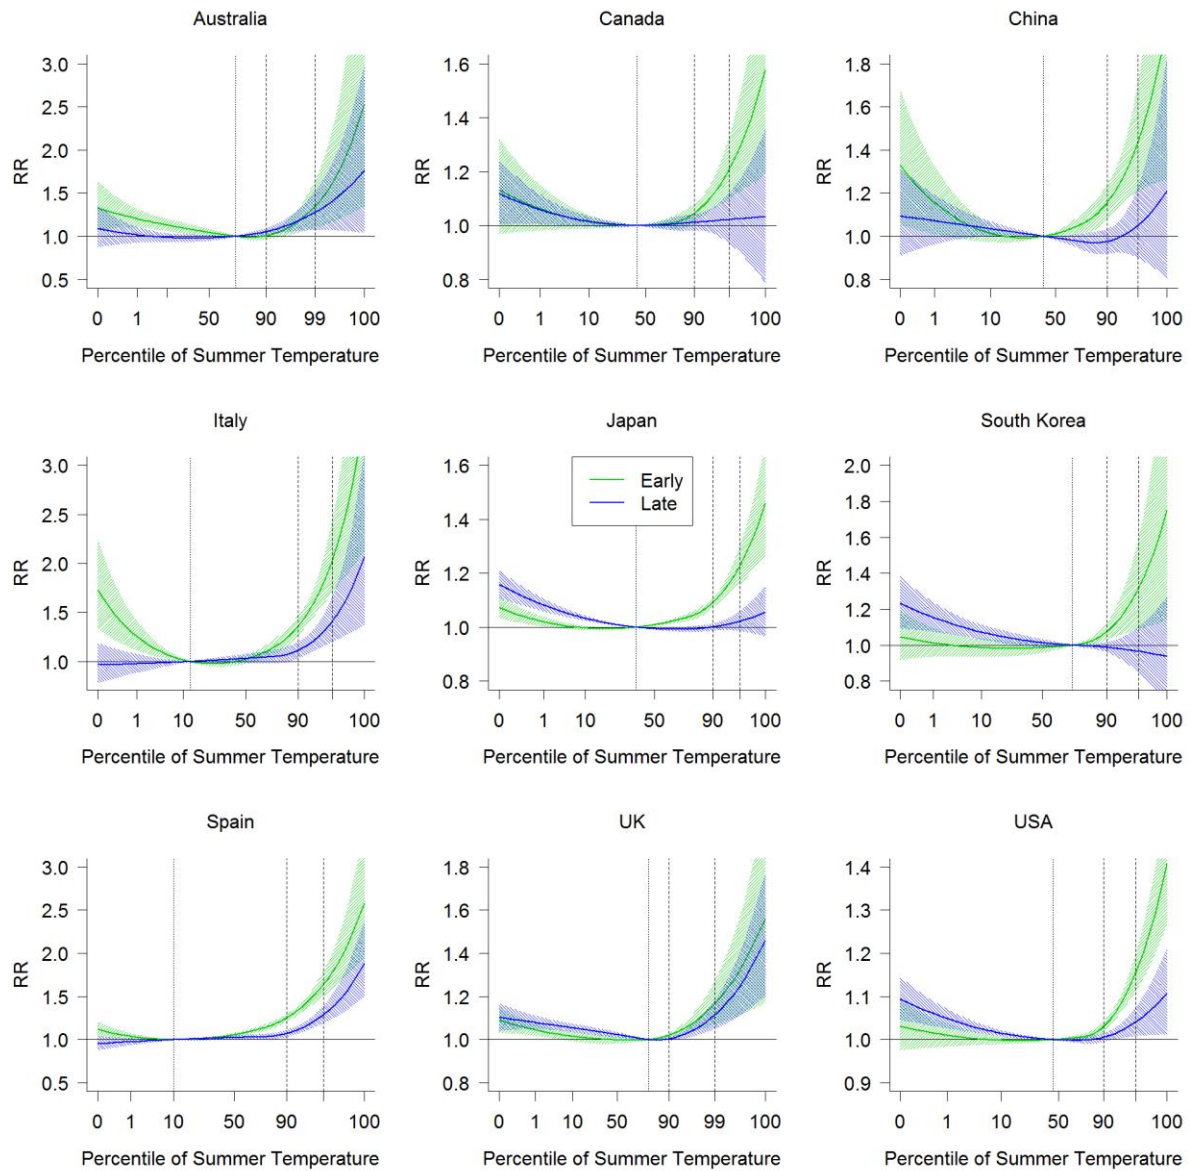

**Web Figure 2.** Replication of Figure 2 in the manuscript for the average across the summer, with confidence intervals as grey areas.

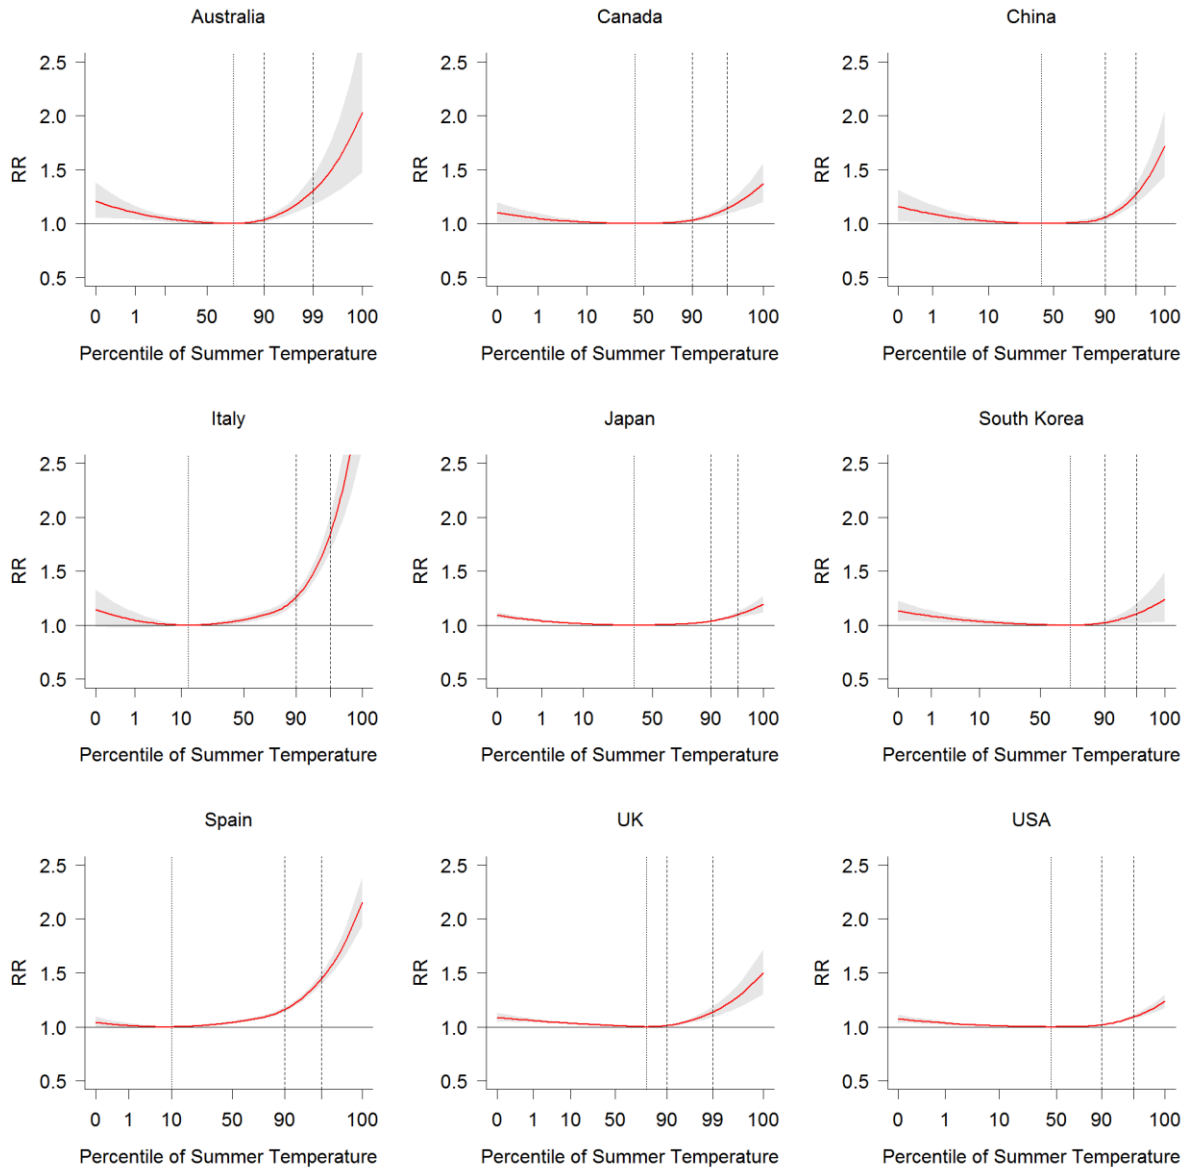

**Web Figure 3.** Overall cumulative exposure-response relationships<sup>a</sup> between heat and mortality predicted for early (corresponding to the mid-point of the first summer month) and late summer (corresponding to the mid-point of the last summer month) in 305 locations, with 95% confidence intervals. The curves are represented on a relative scale of summer temperature percentiles, using country-specific distributions. Different study periods in 1985-2012.



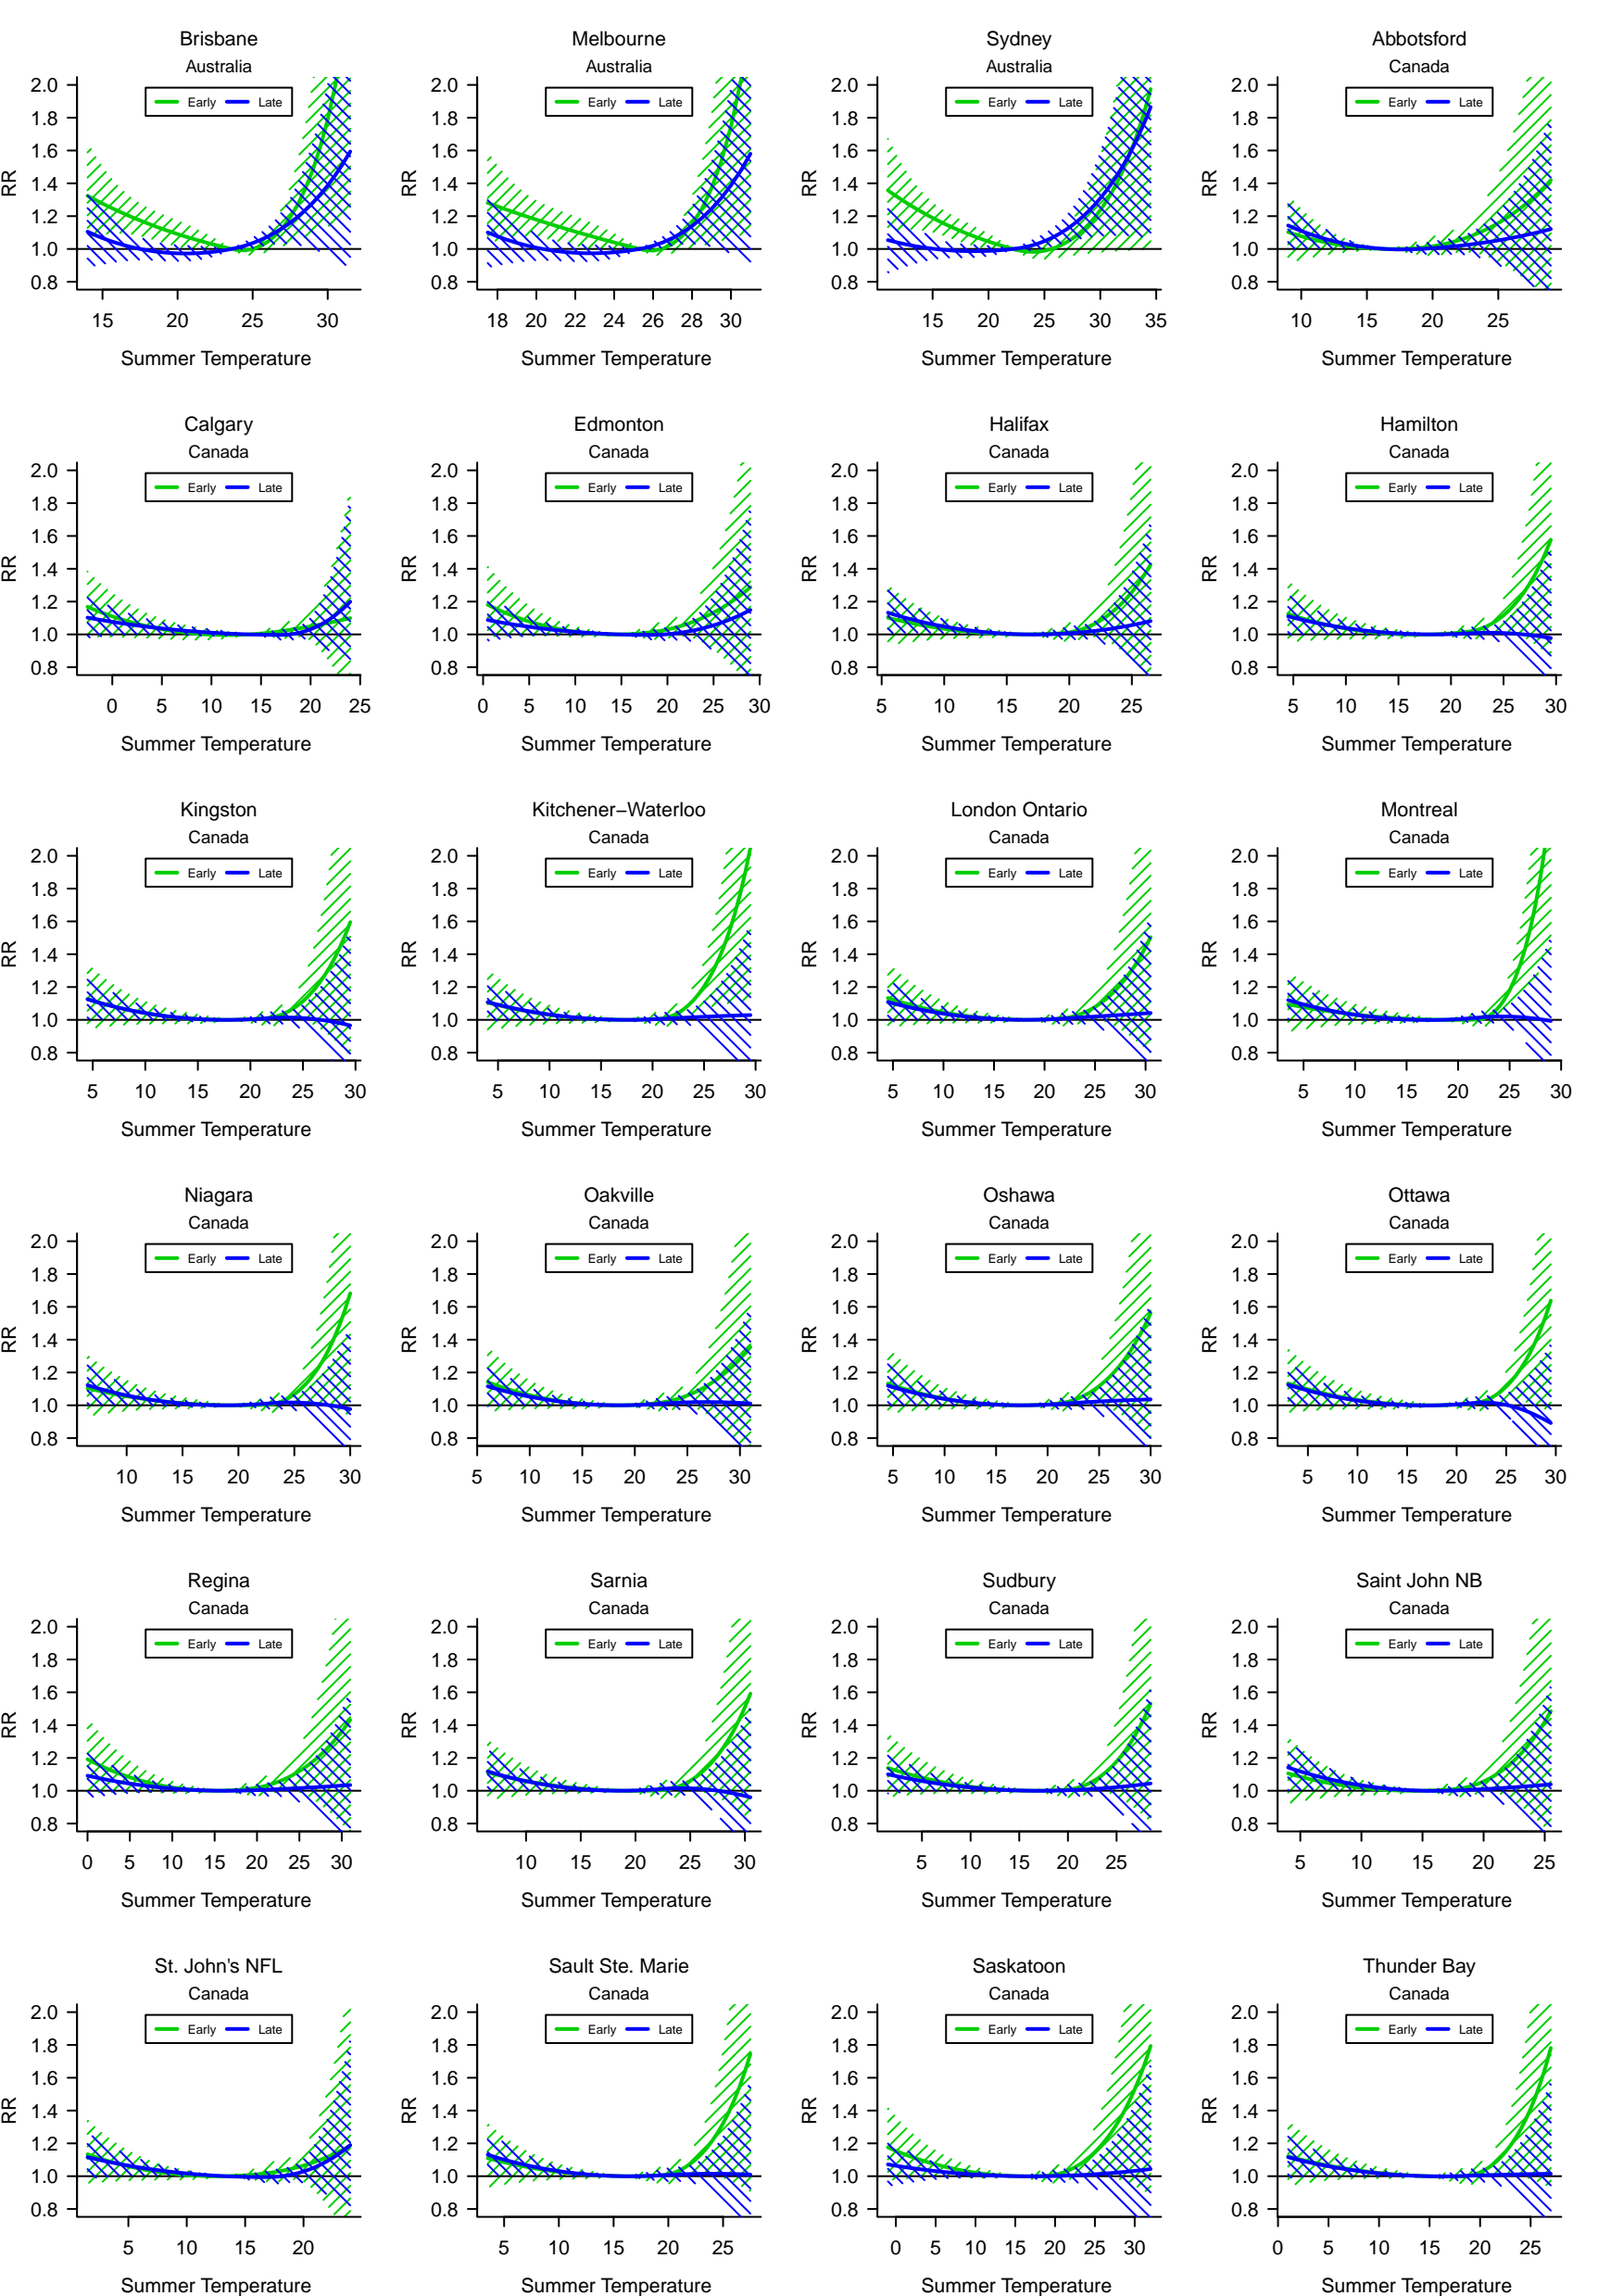

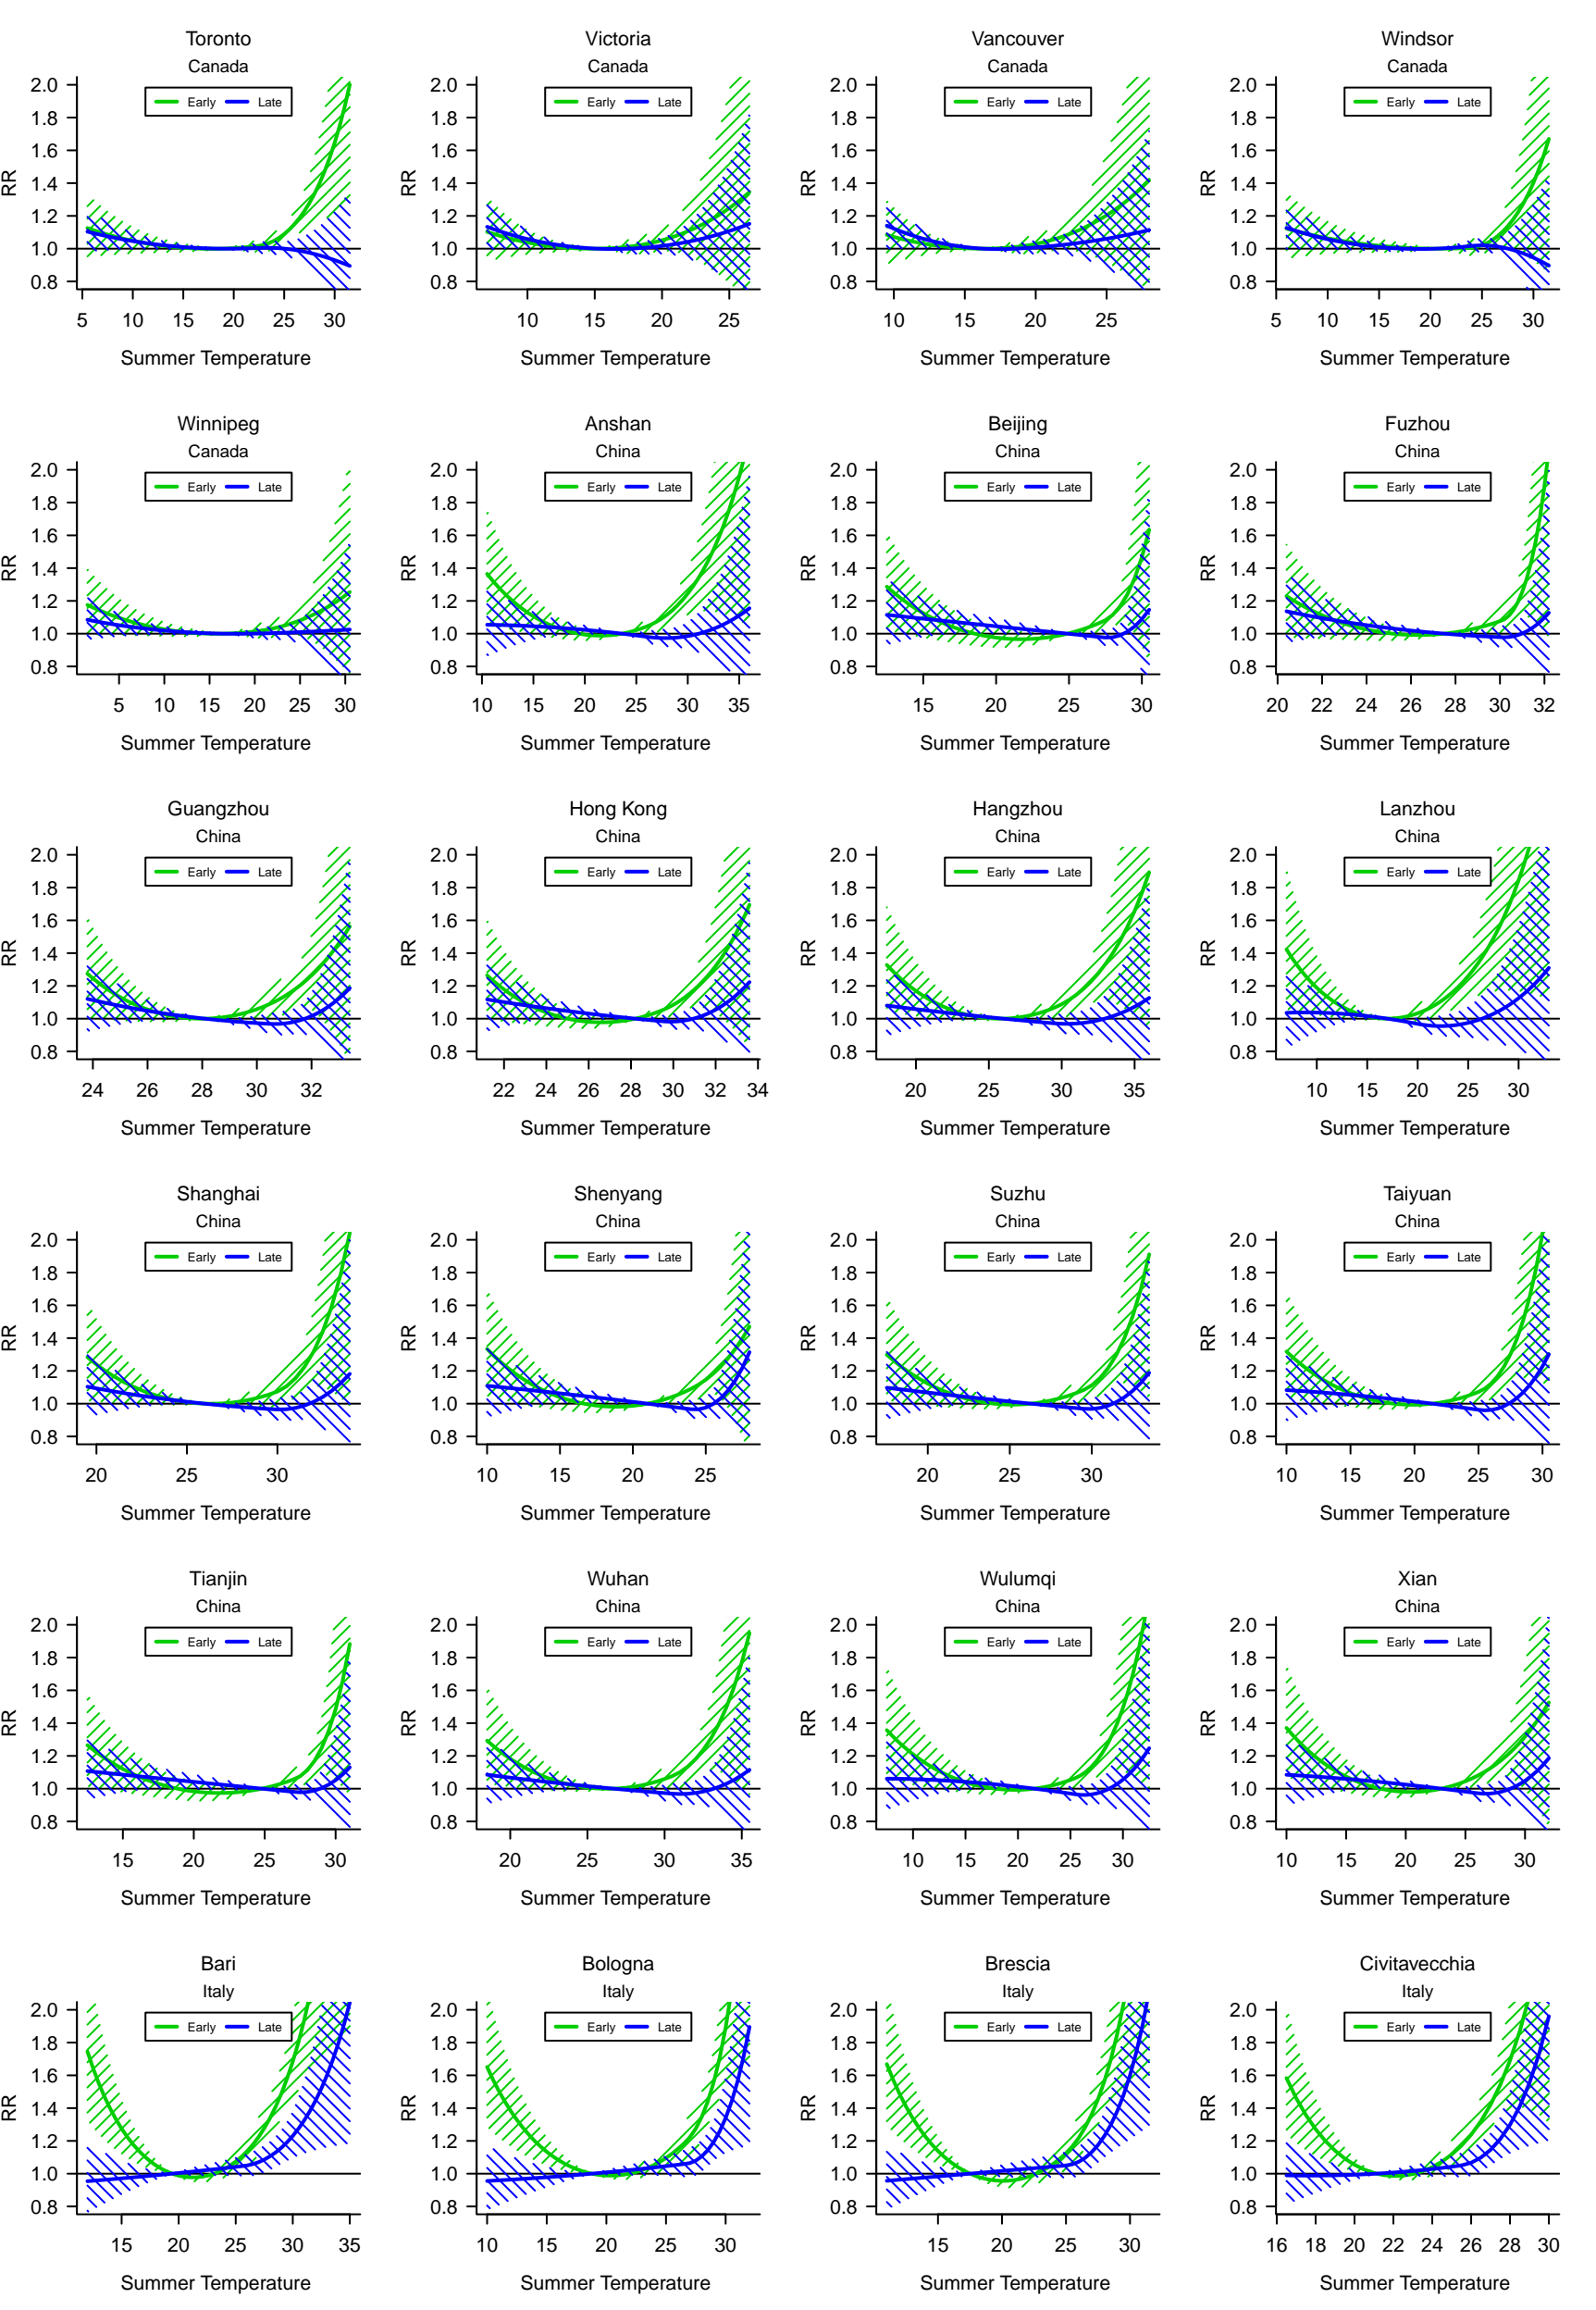

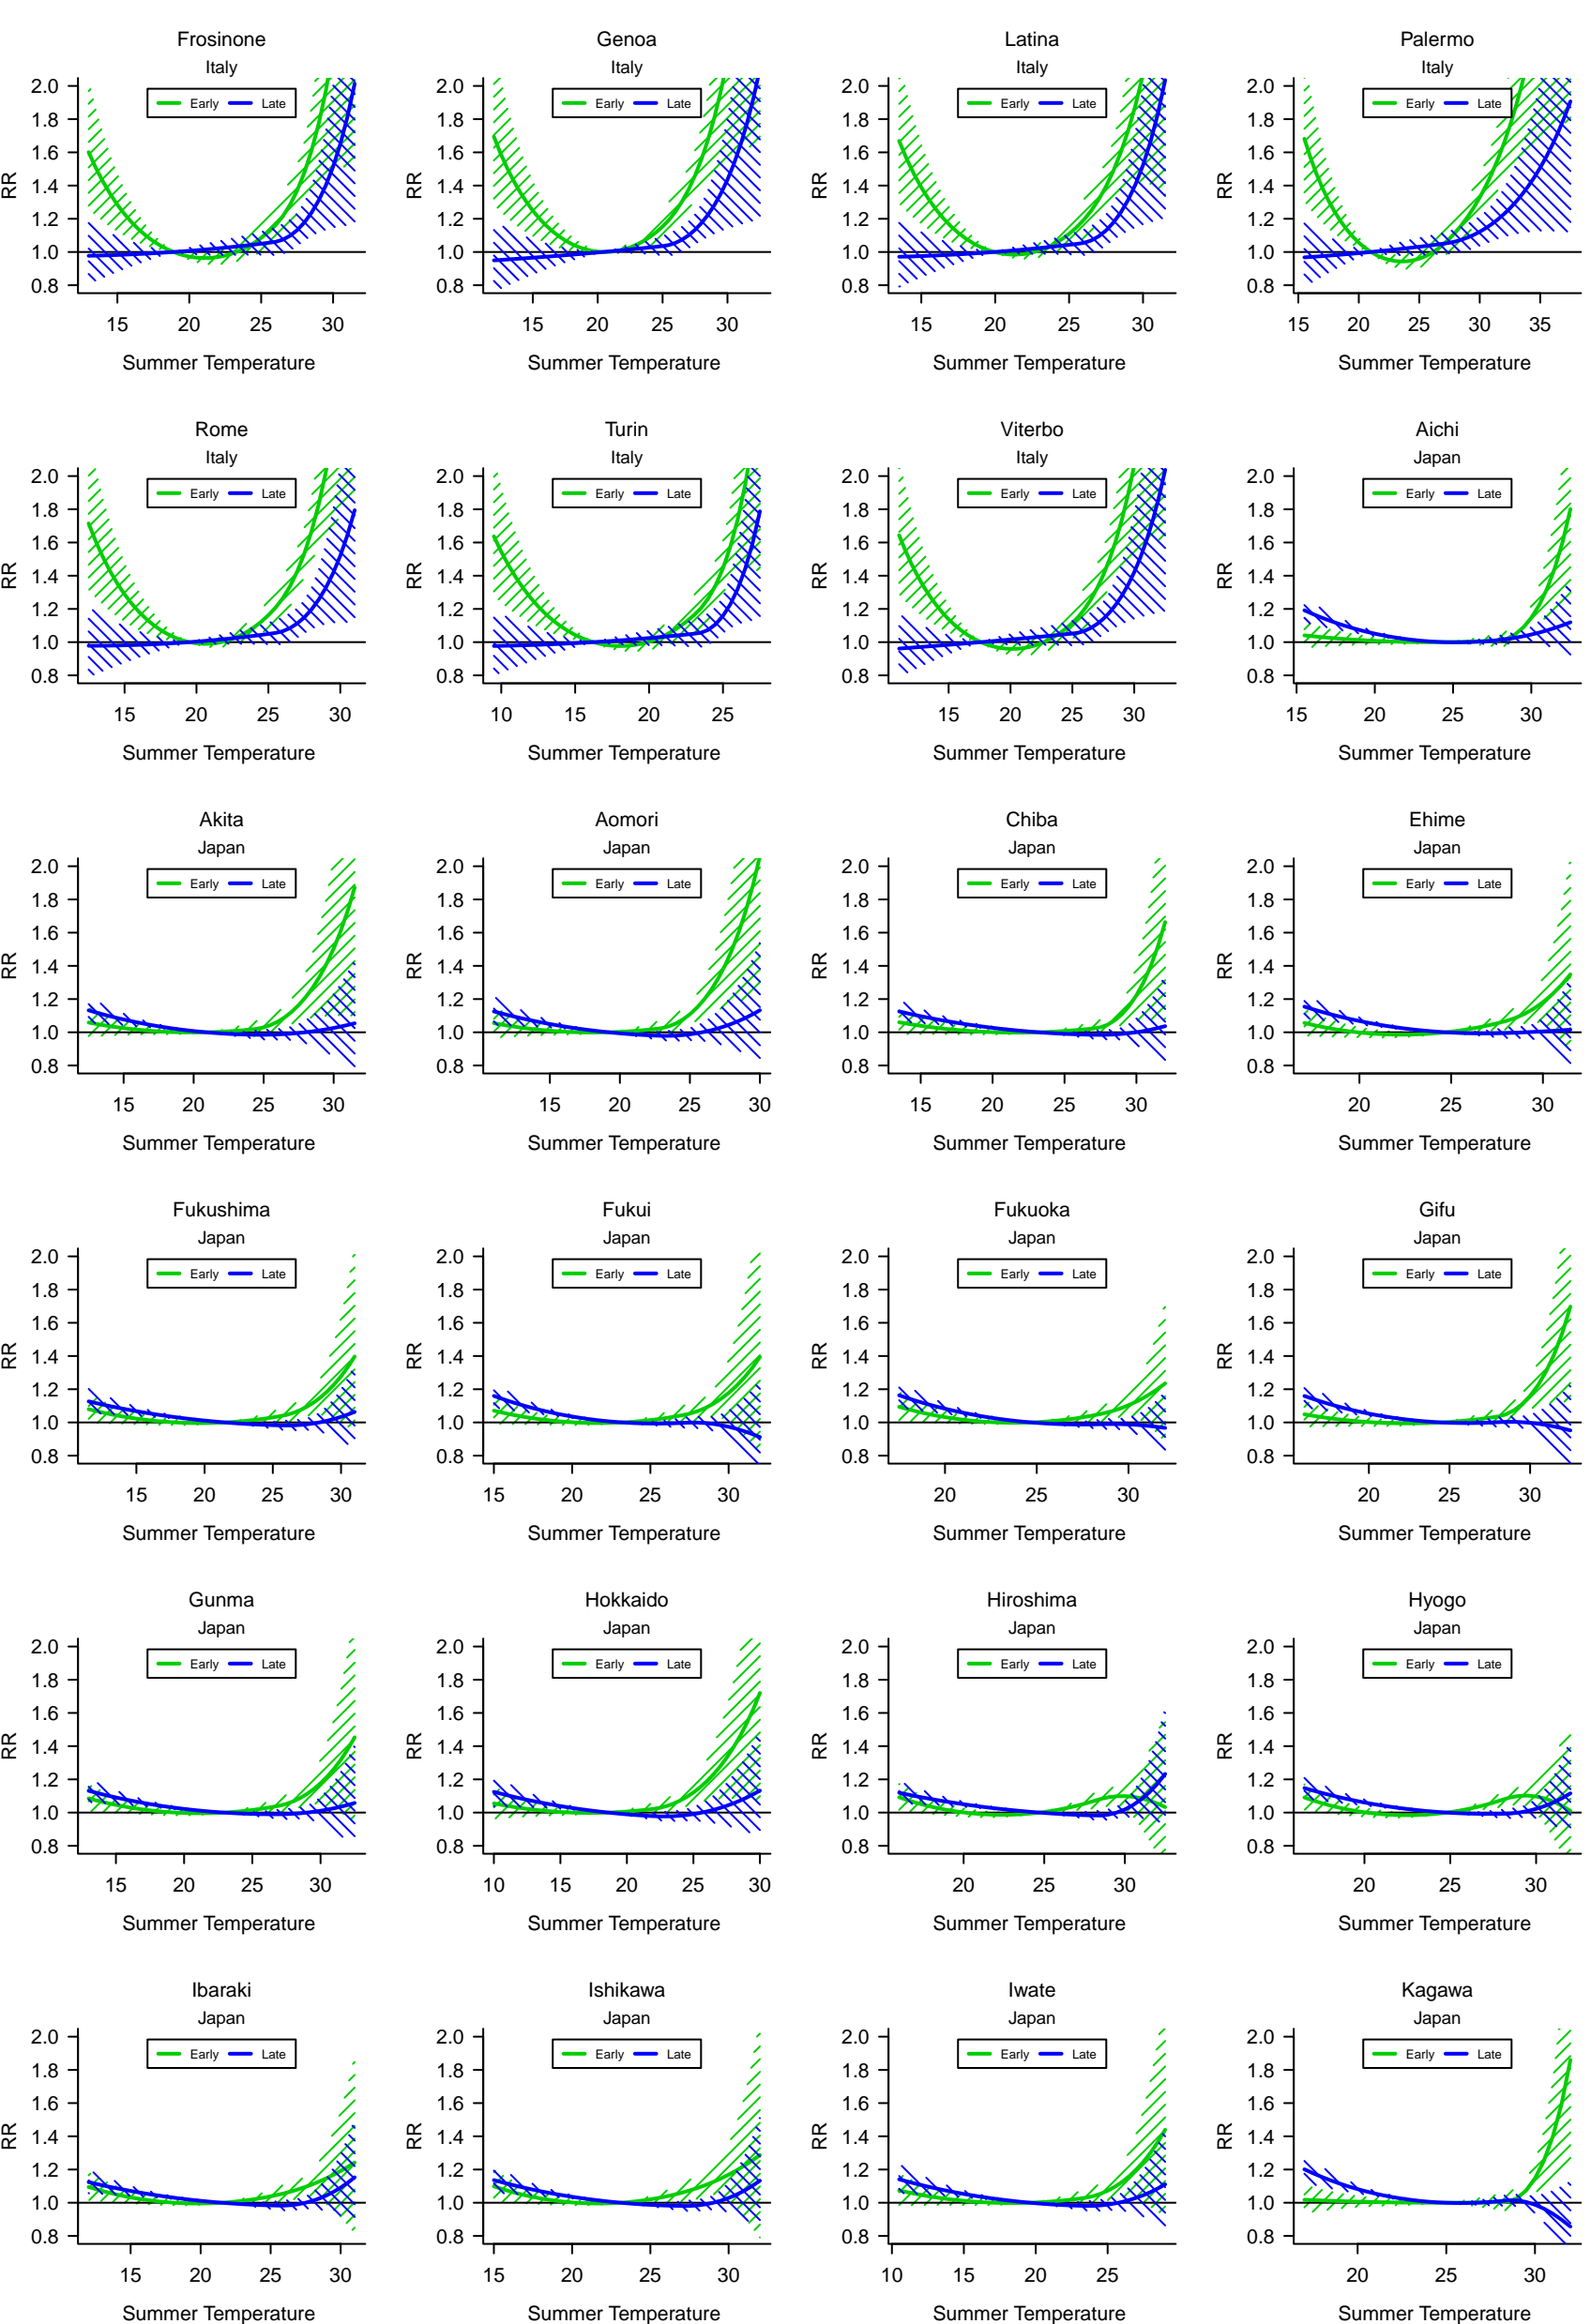

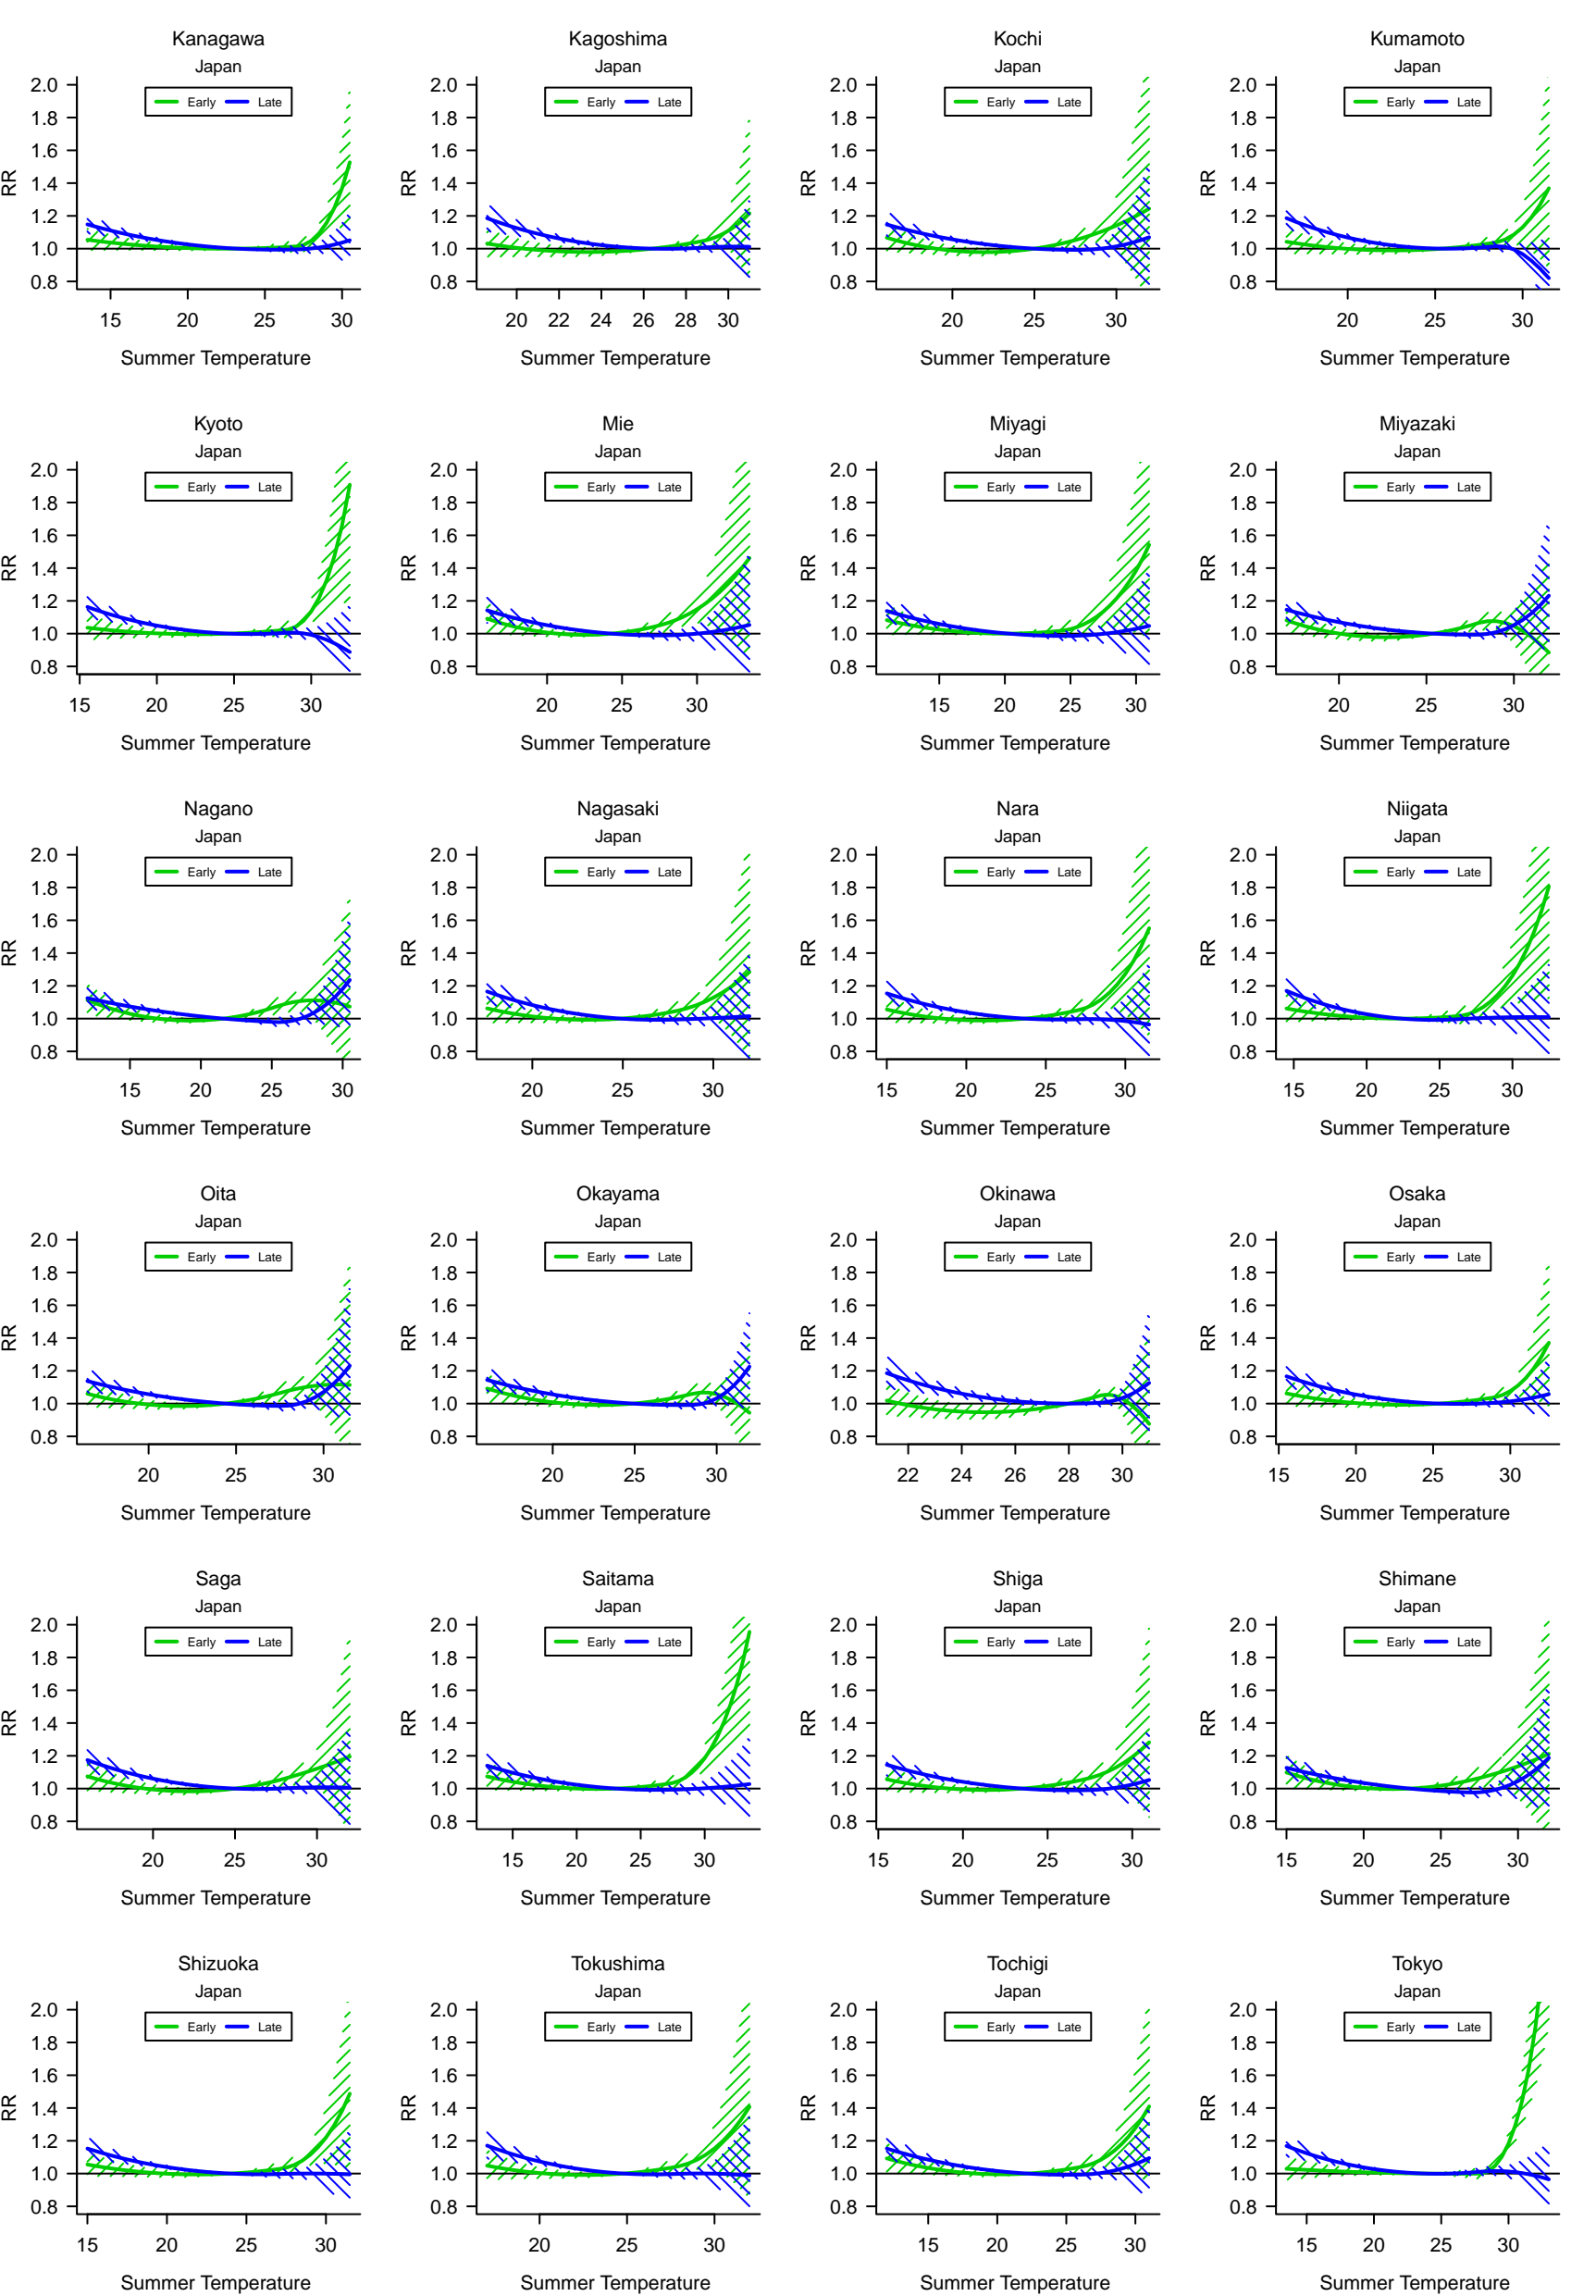

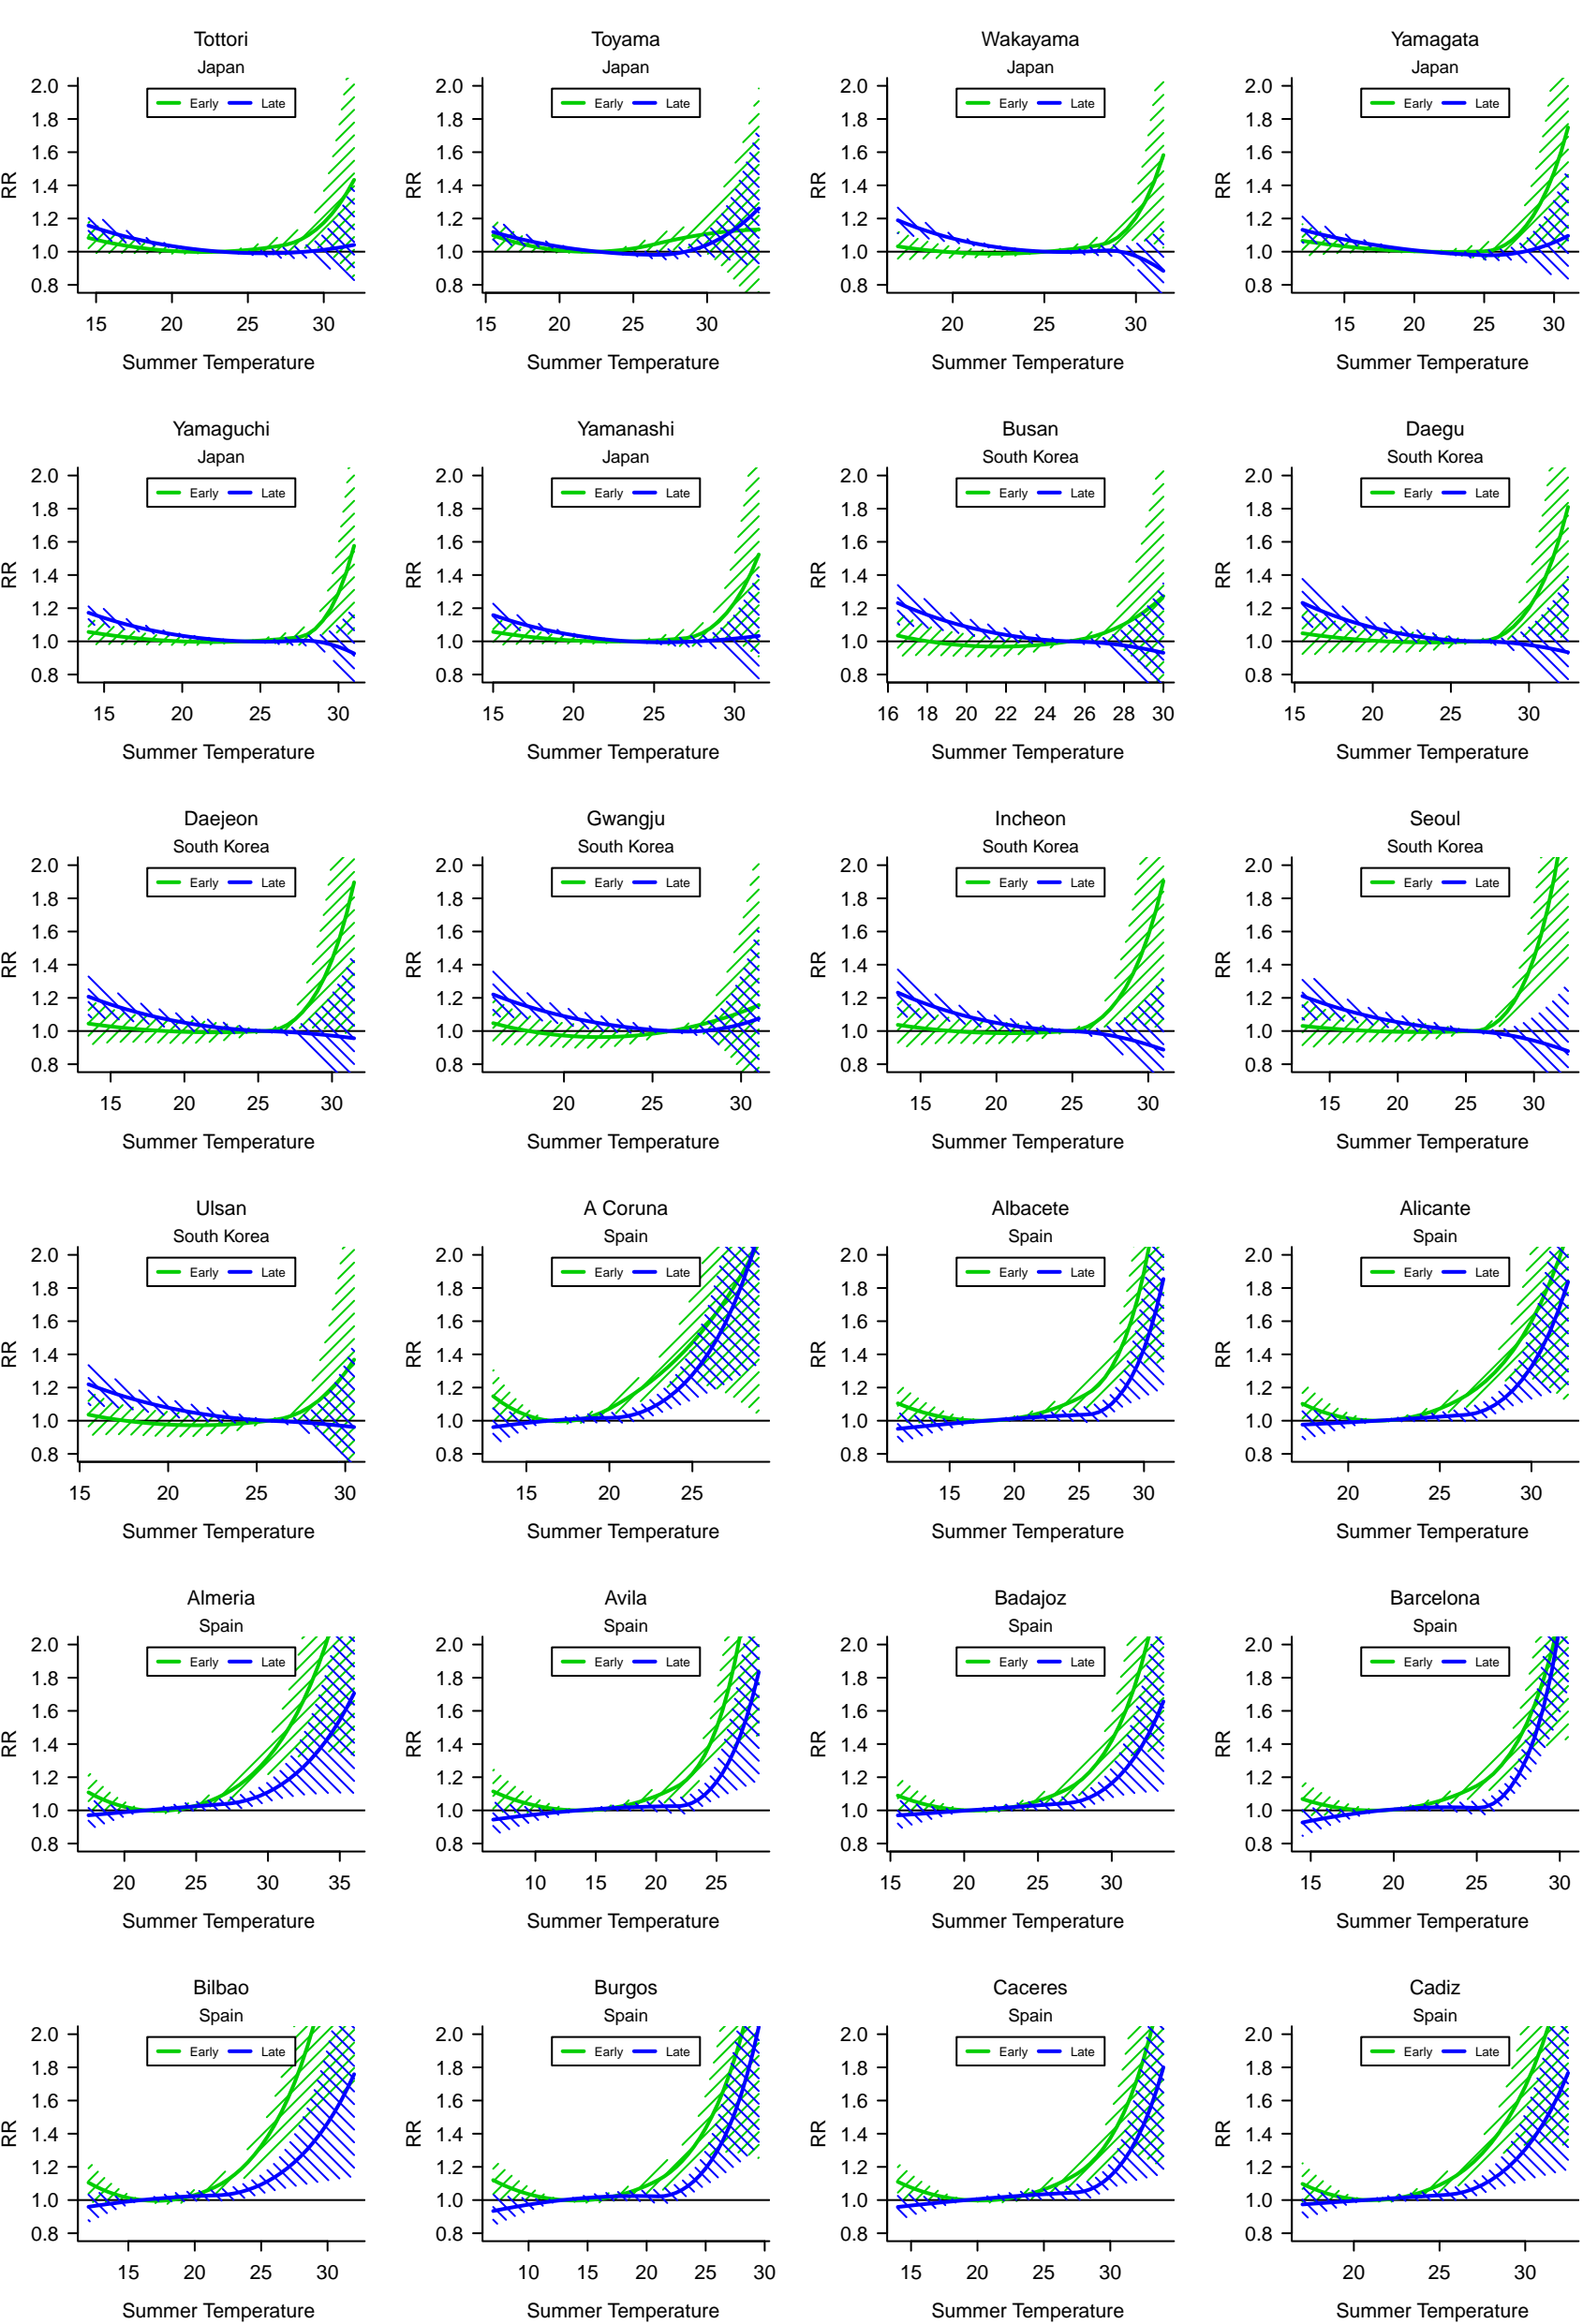

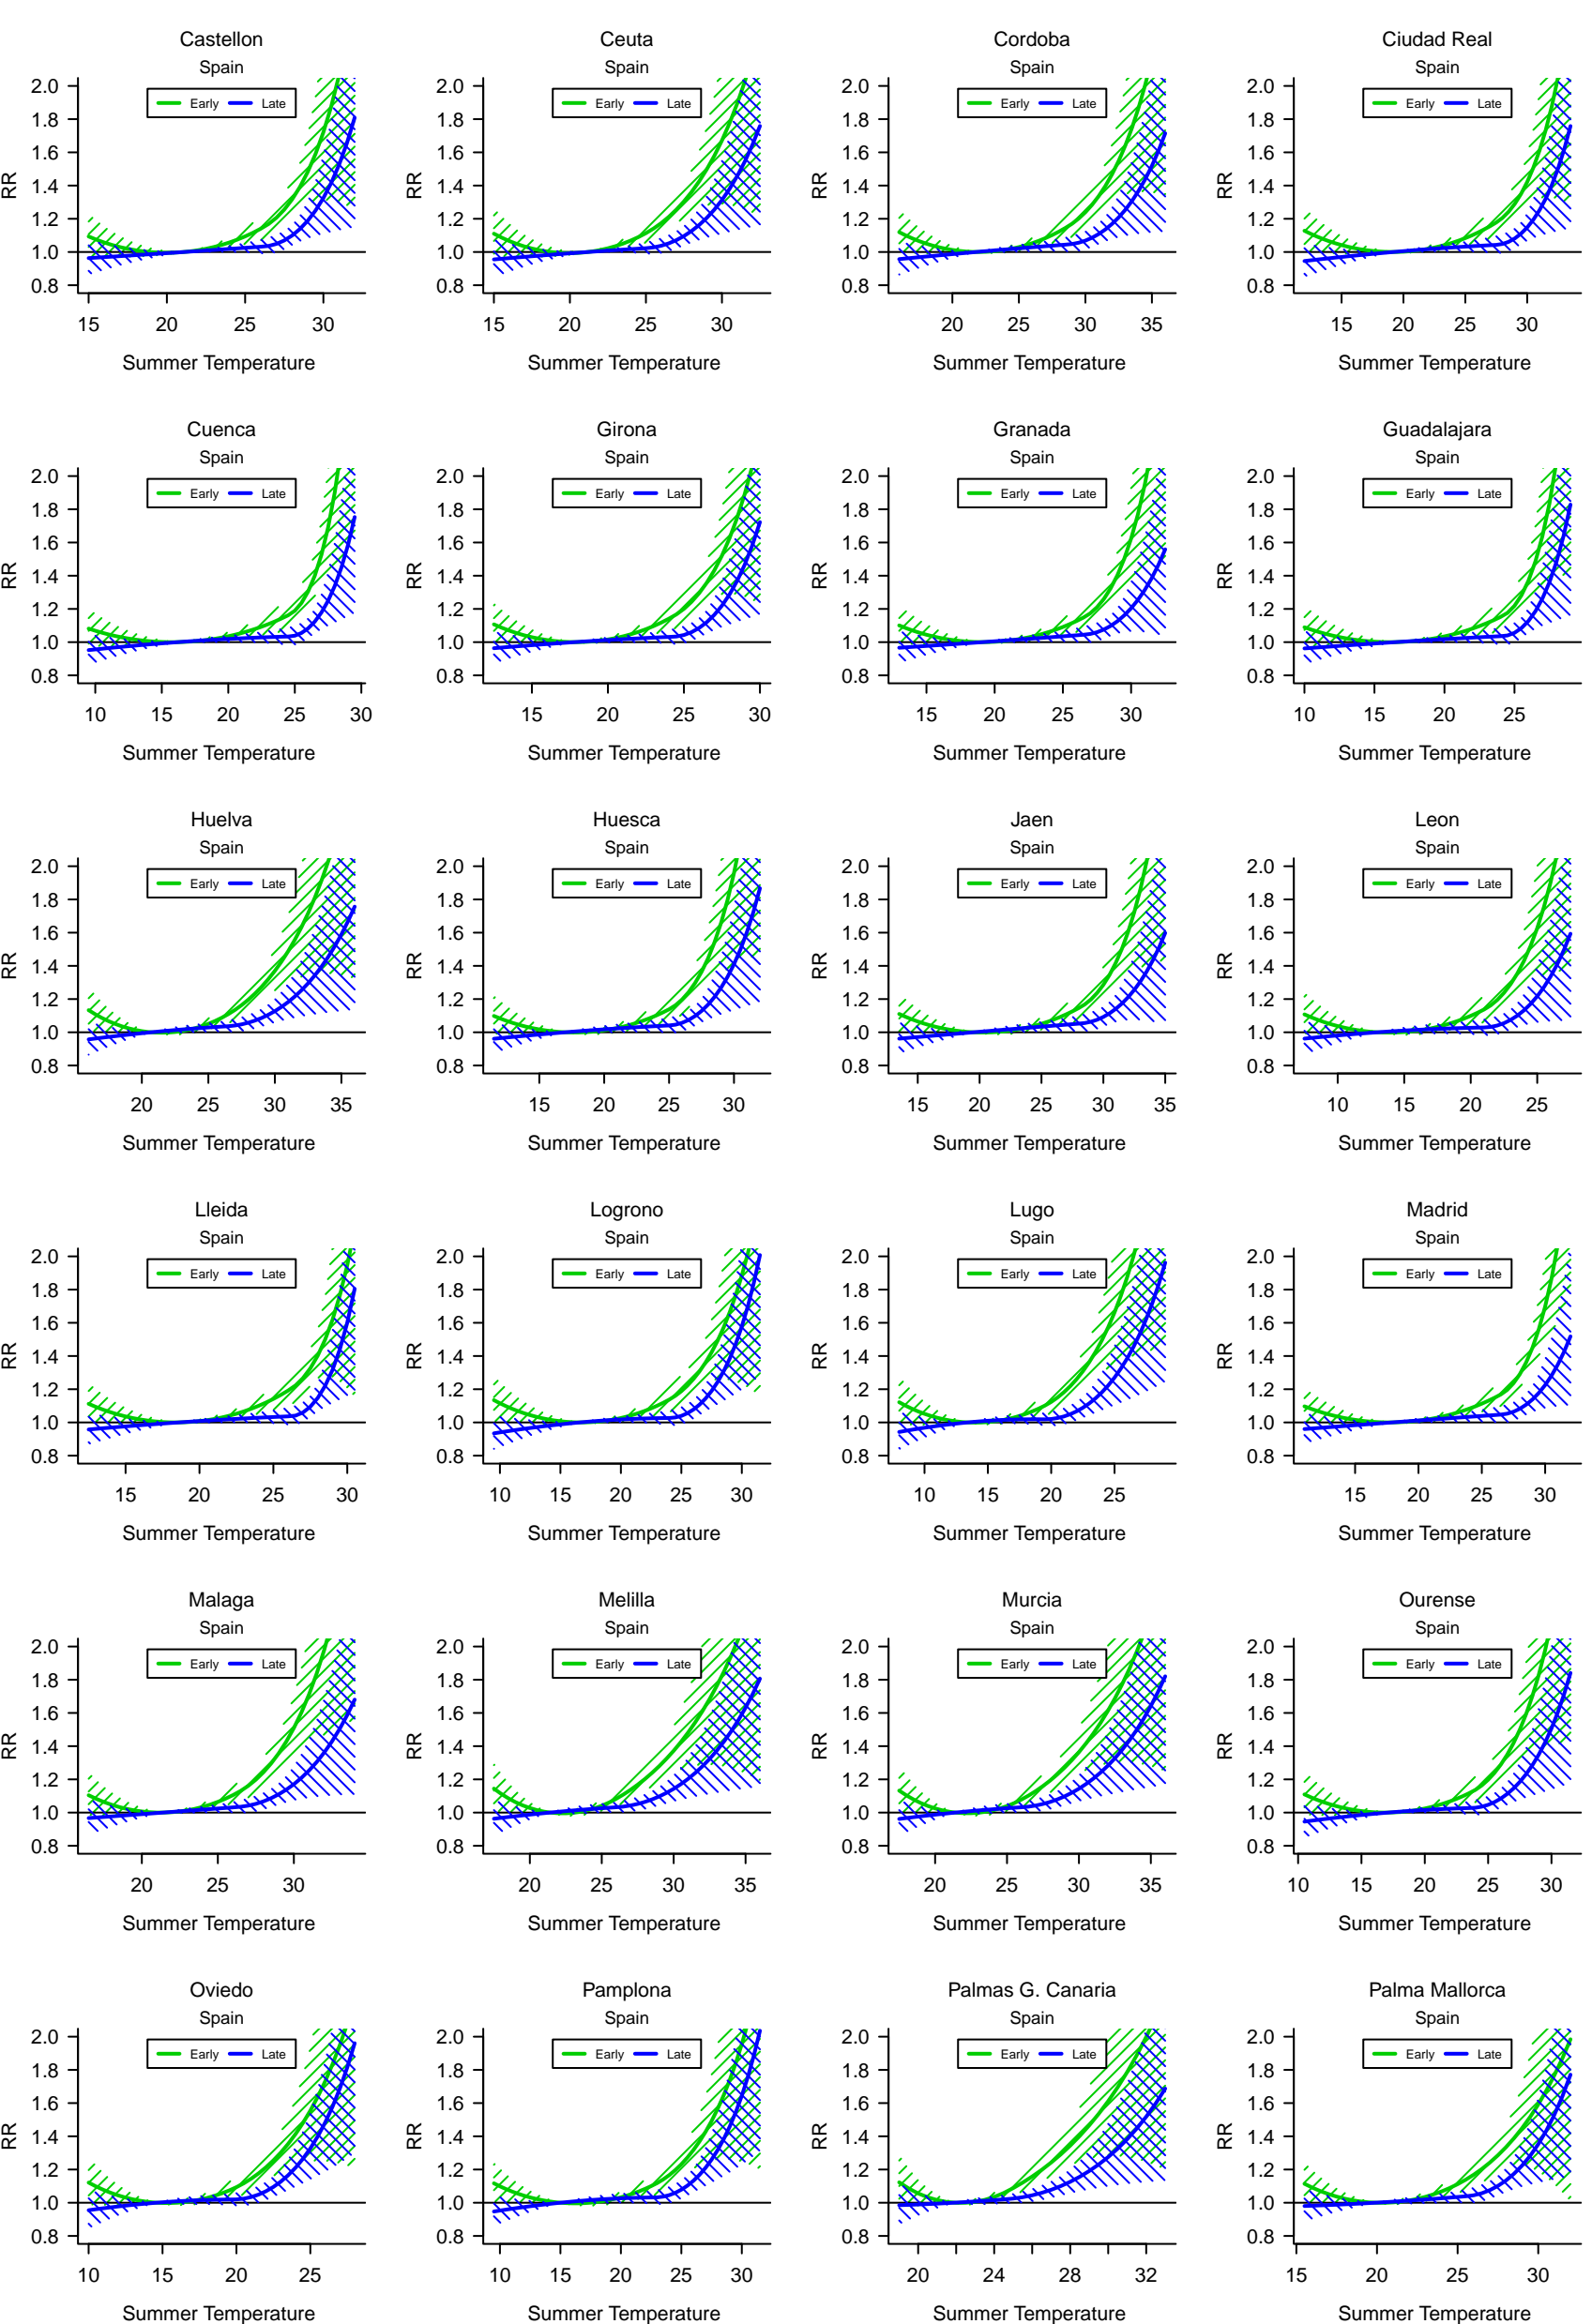

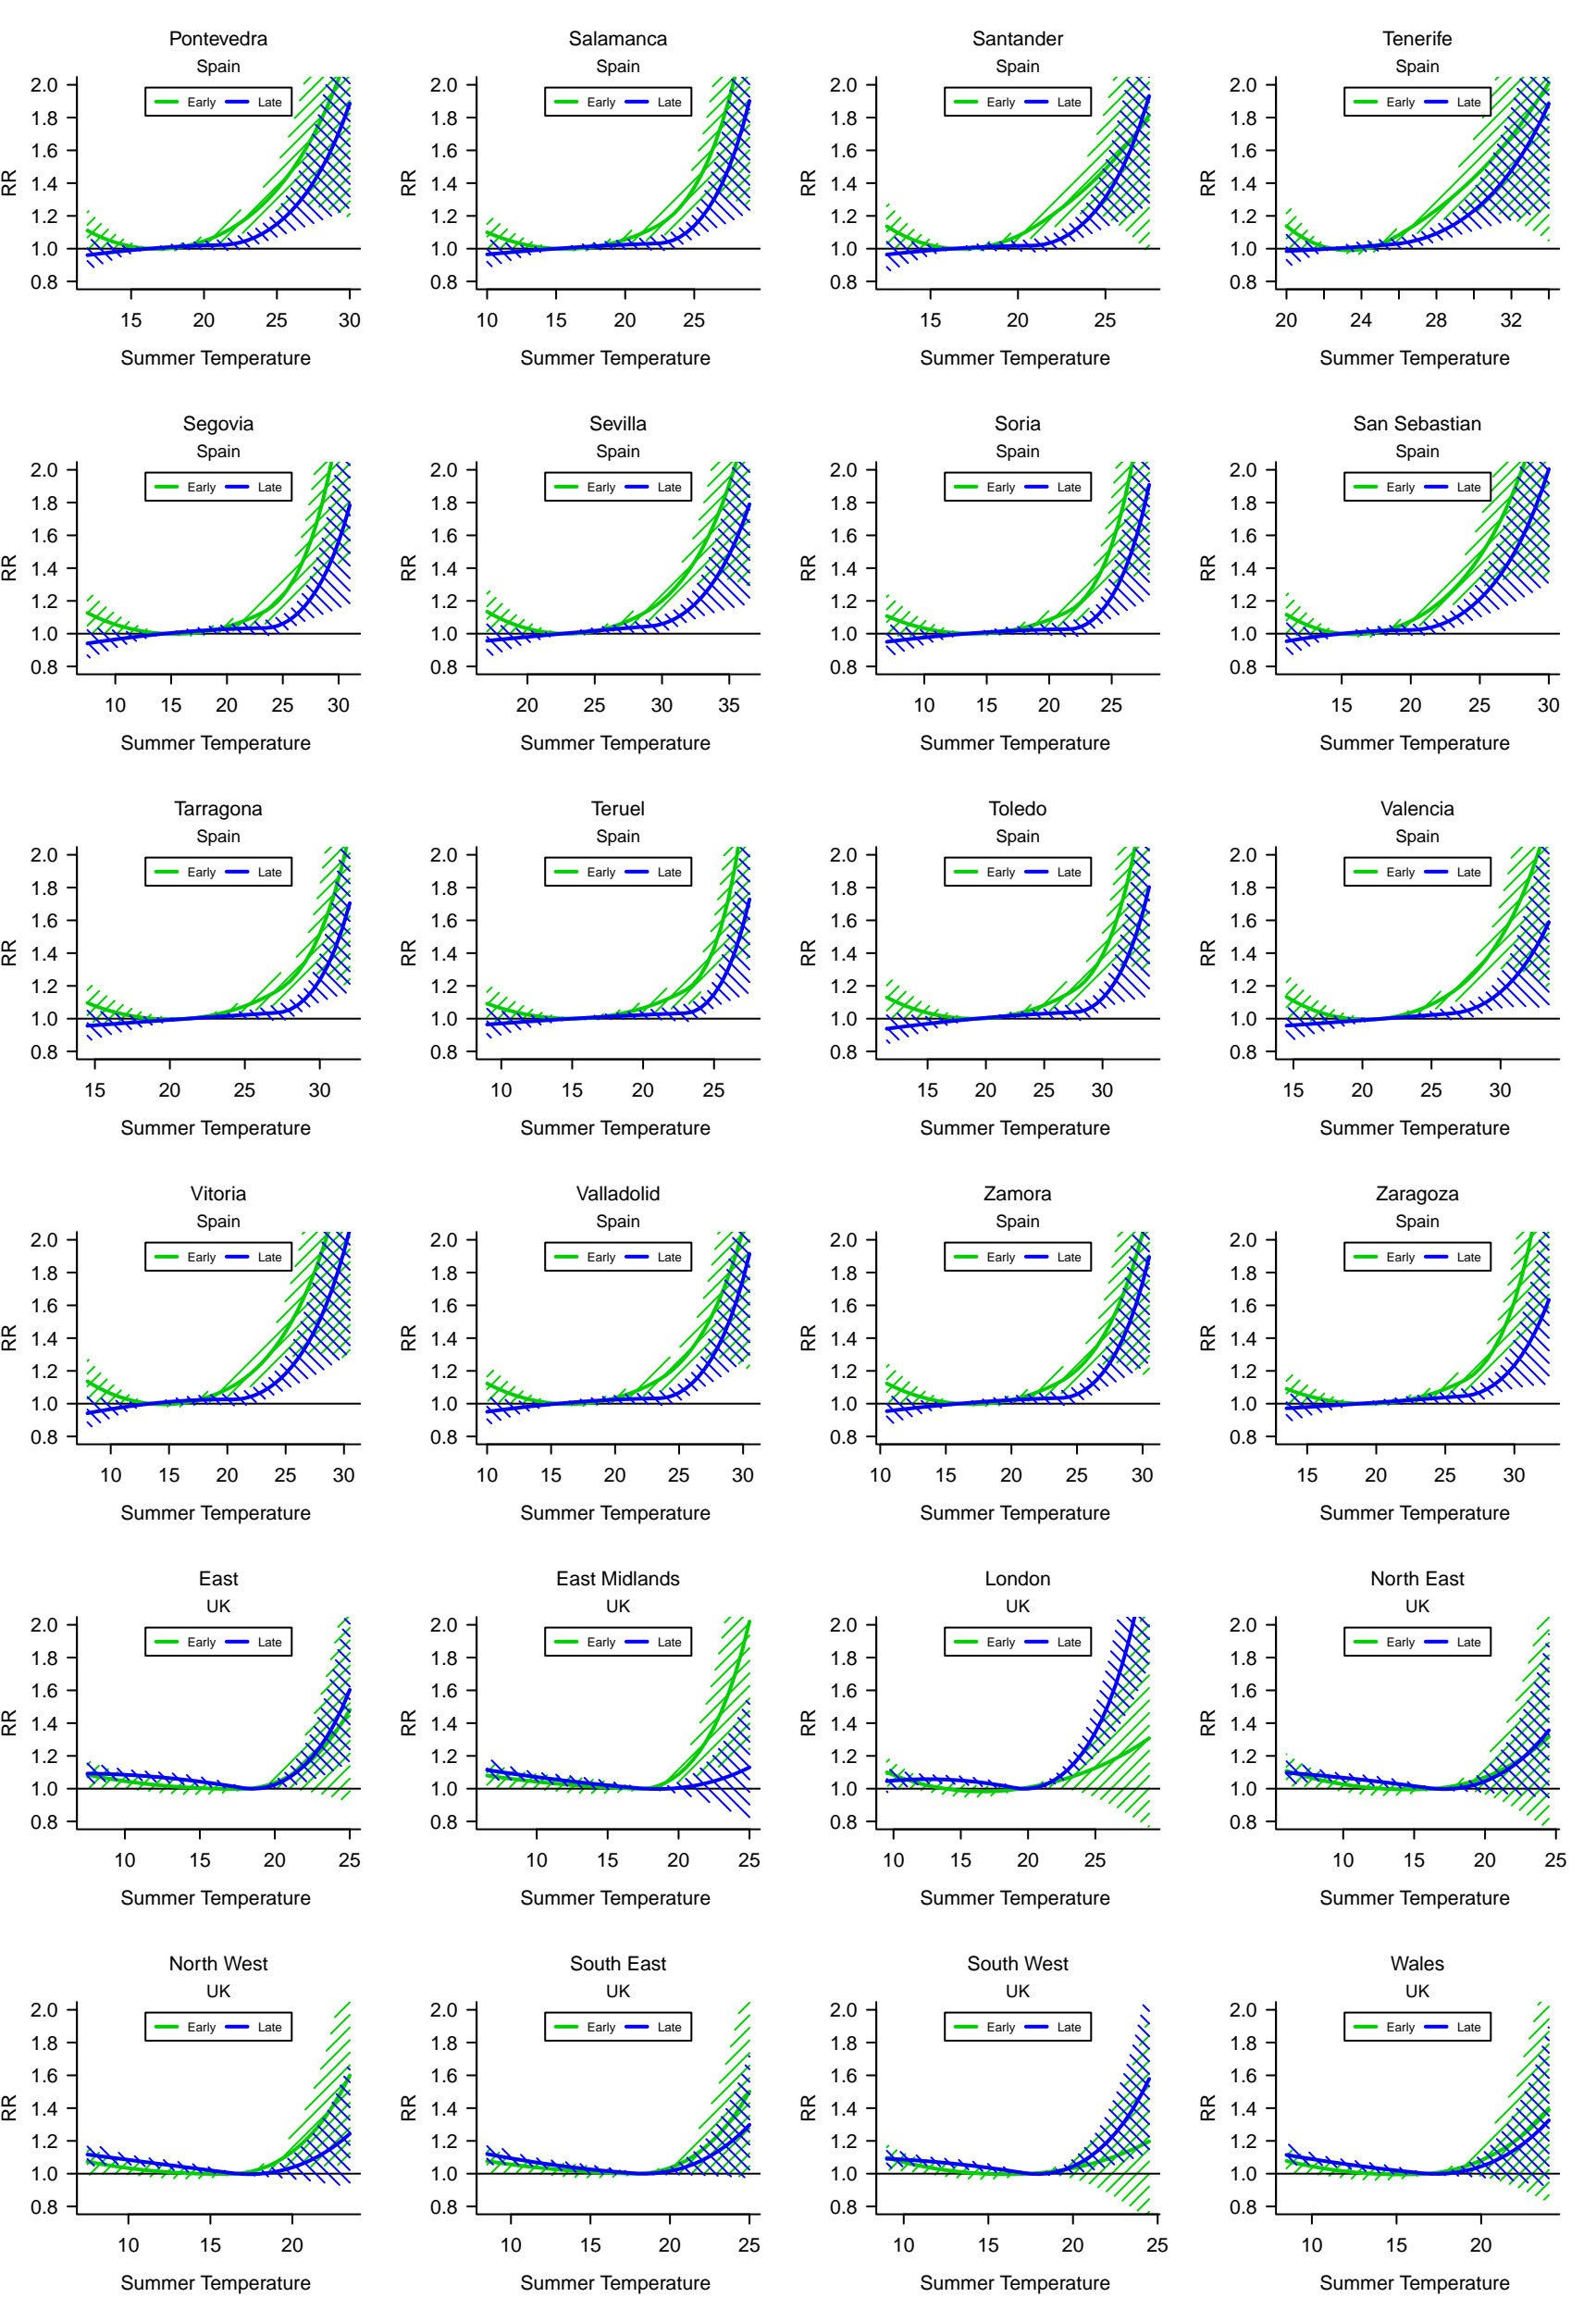

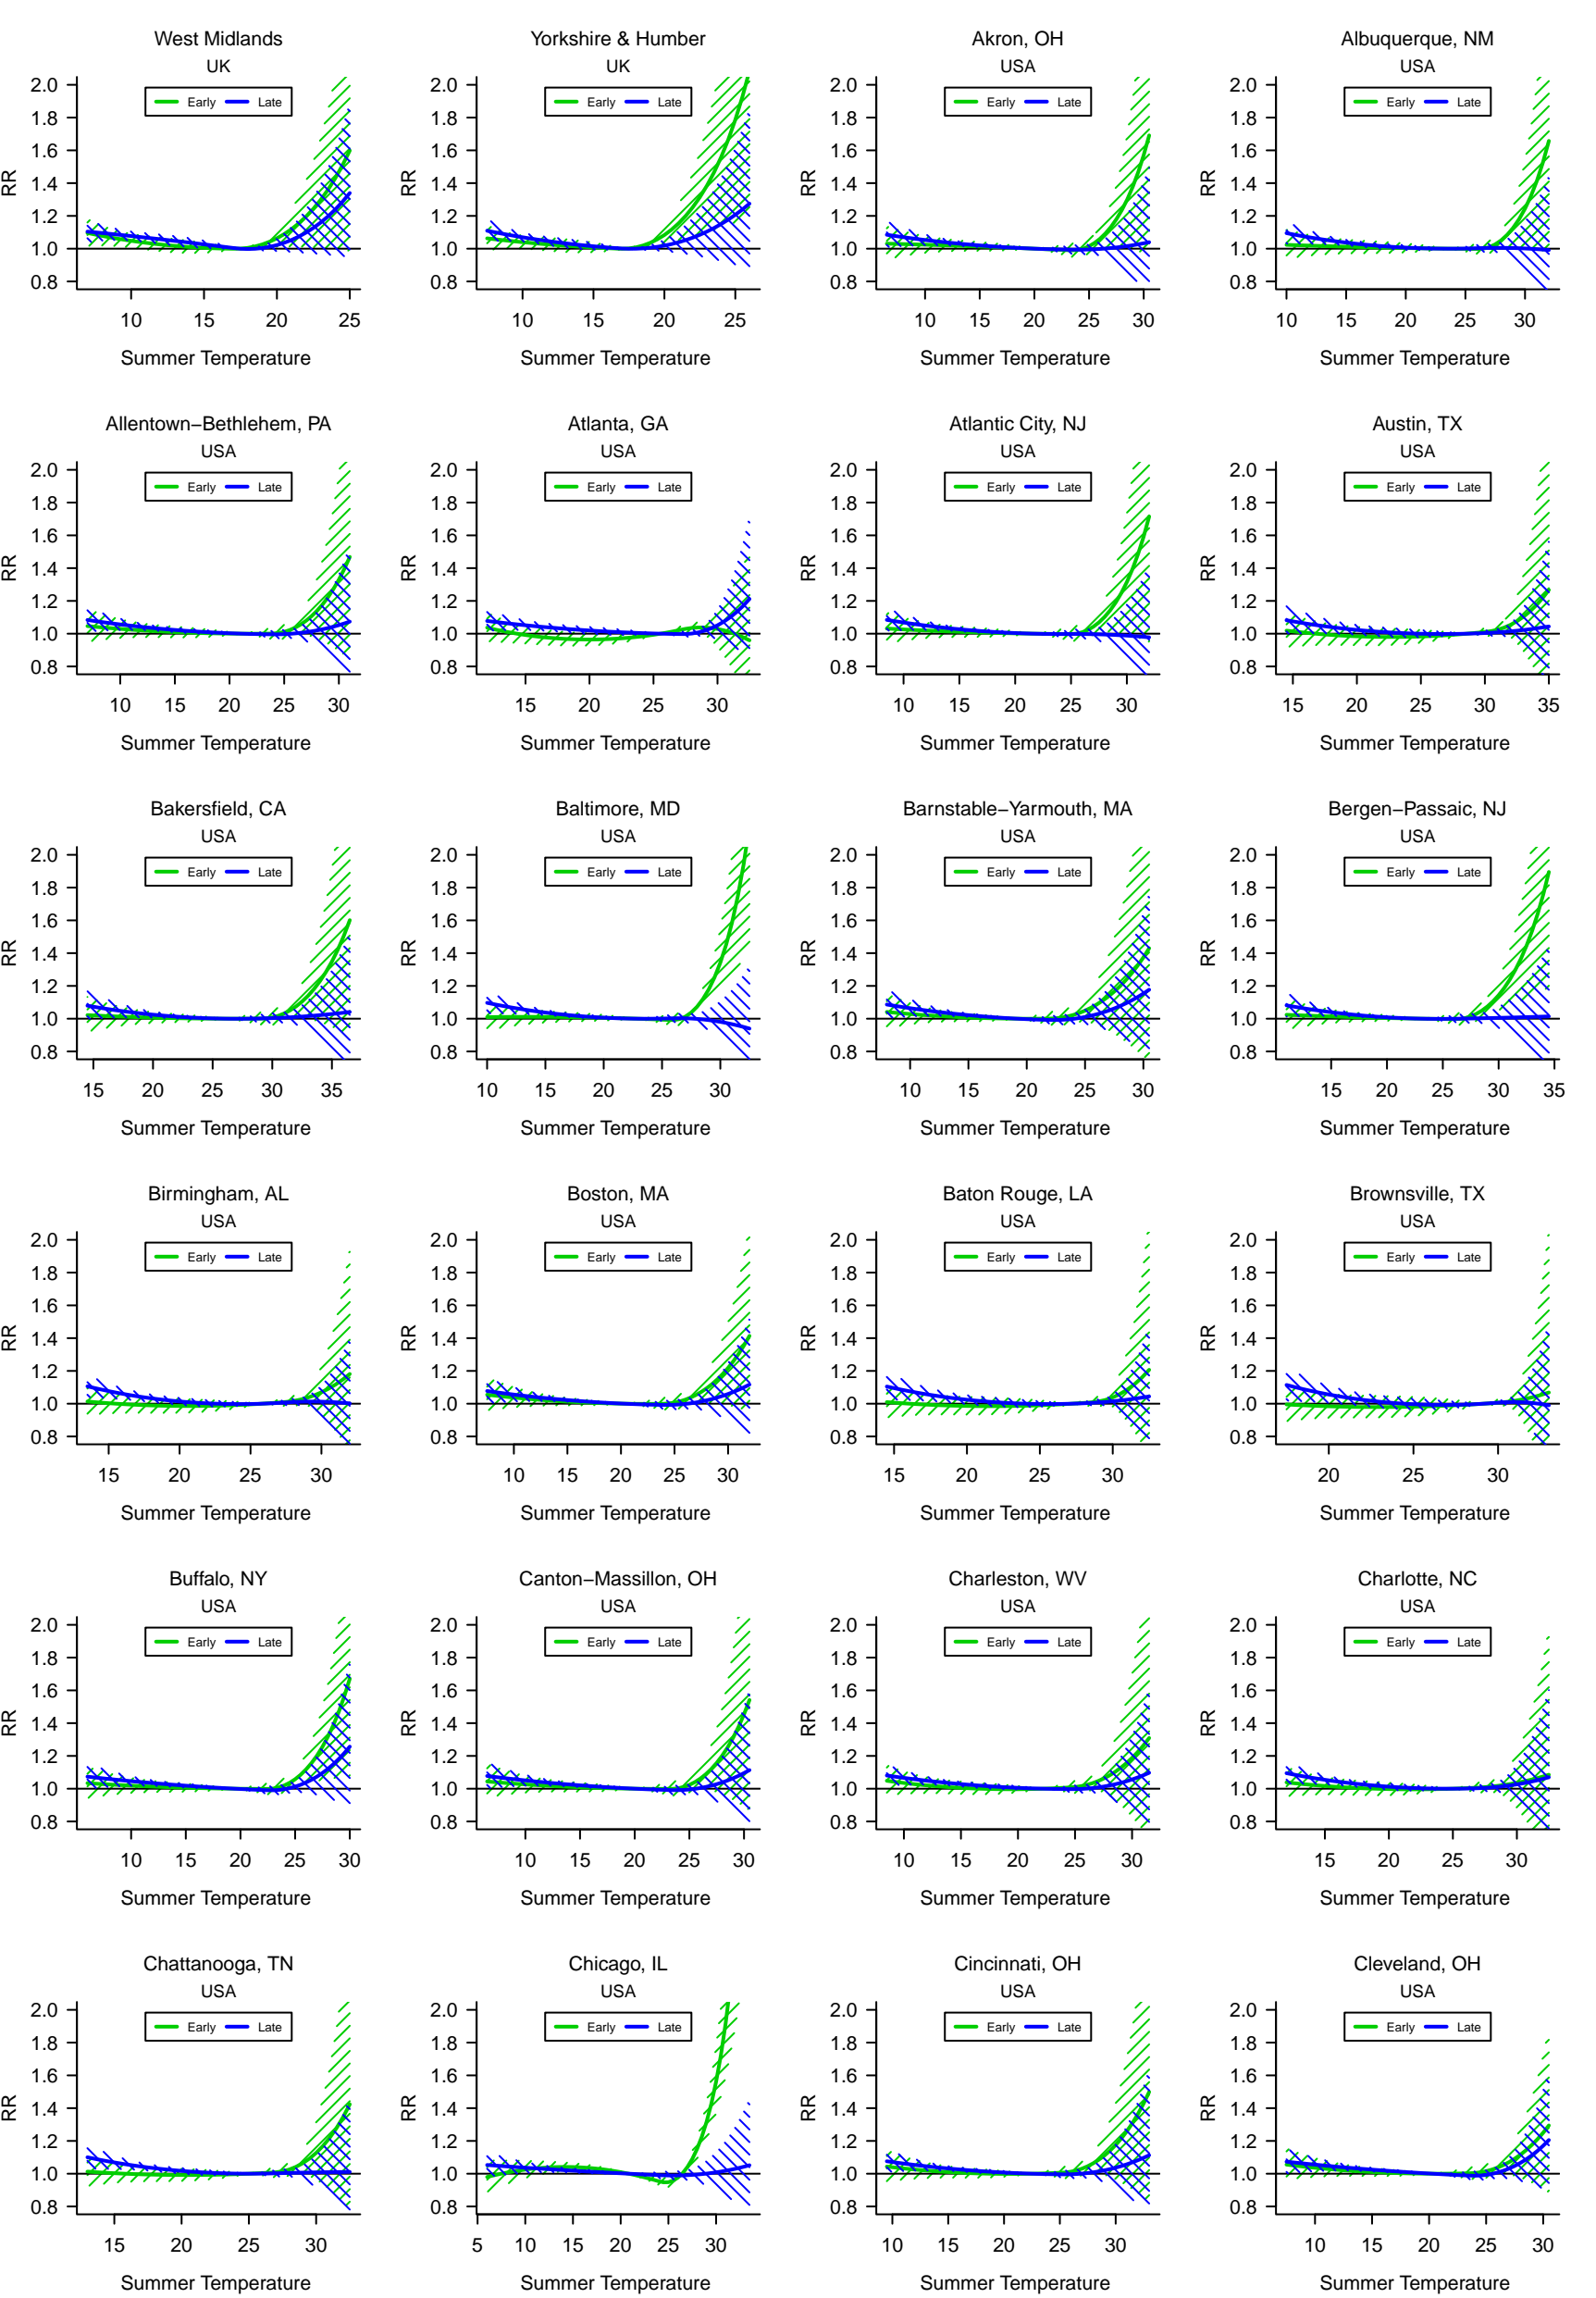



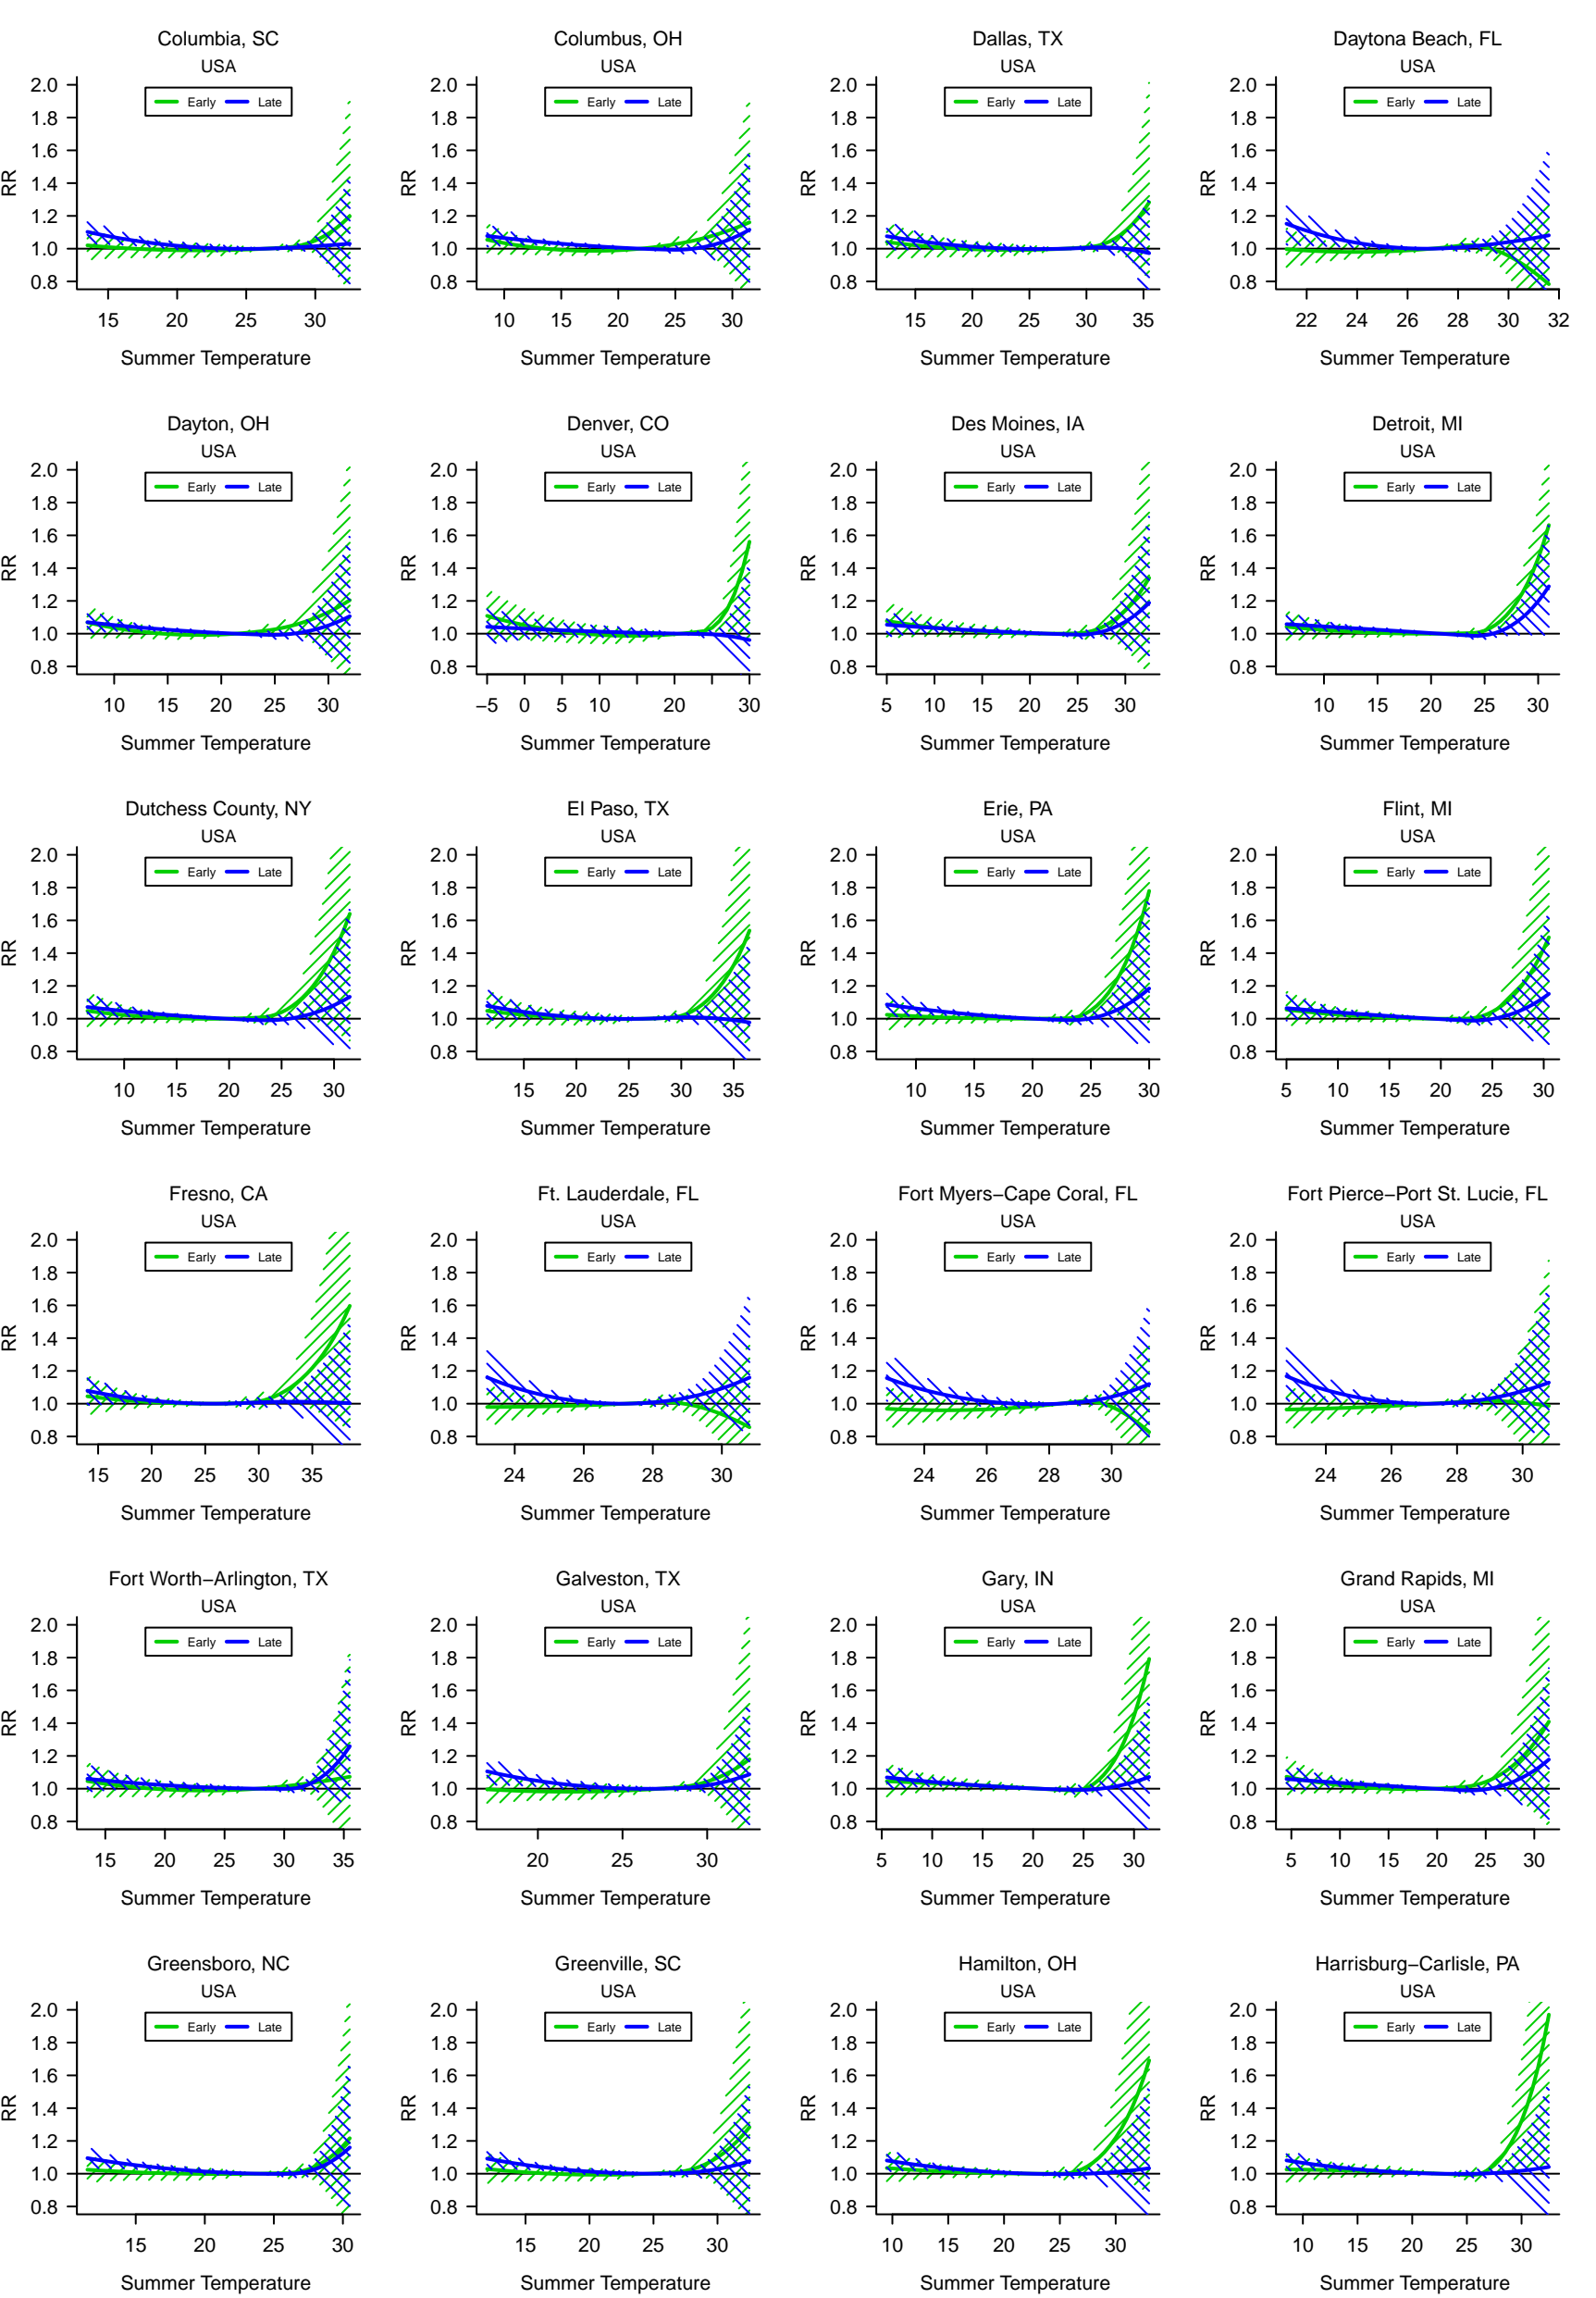

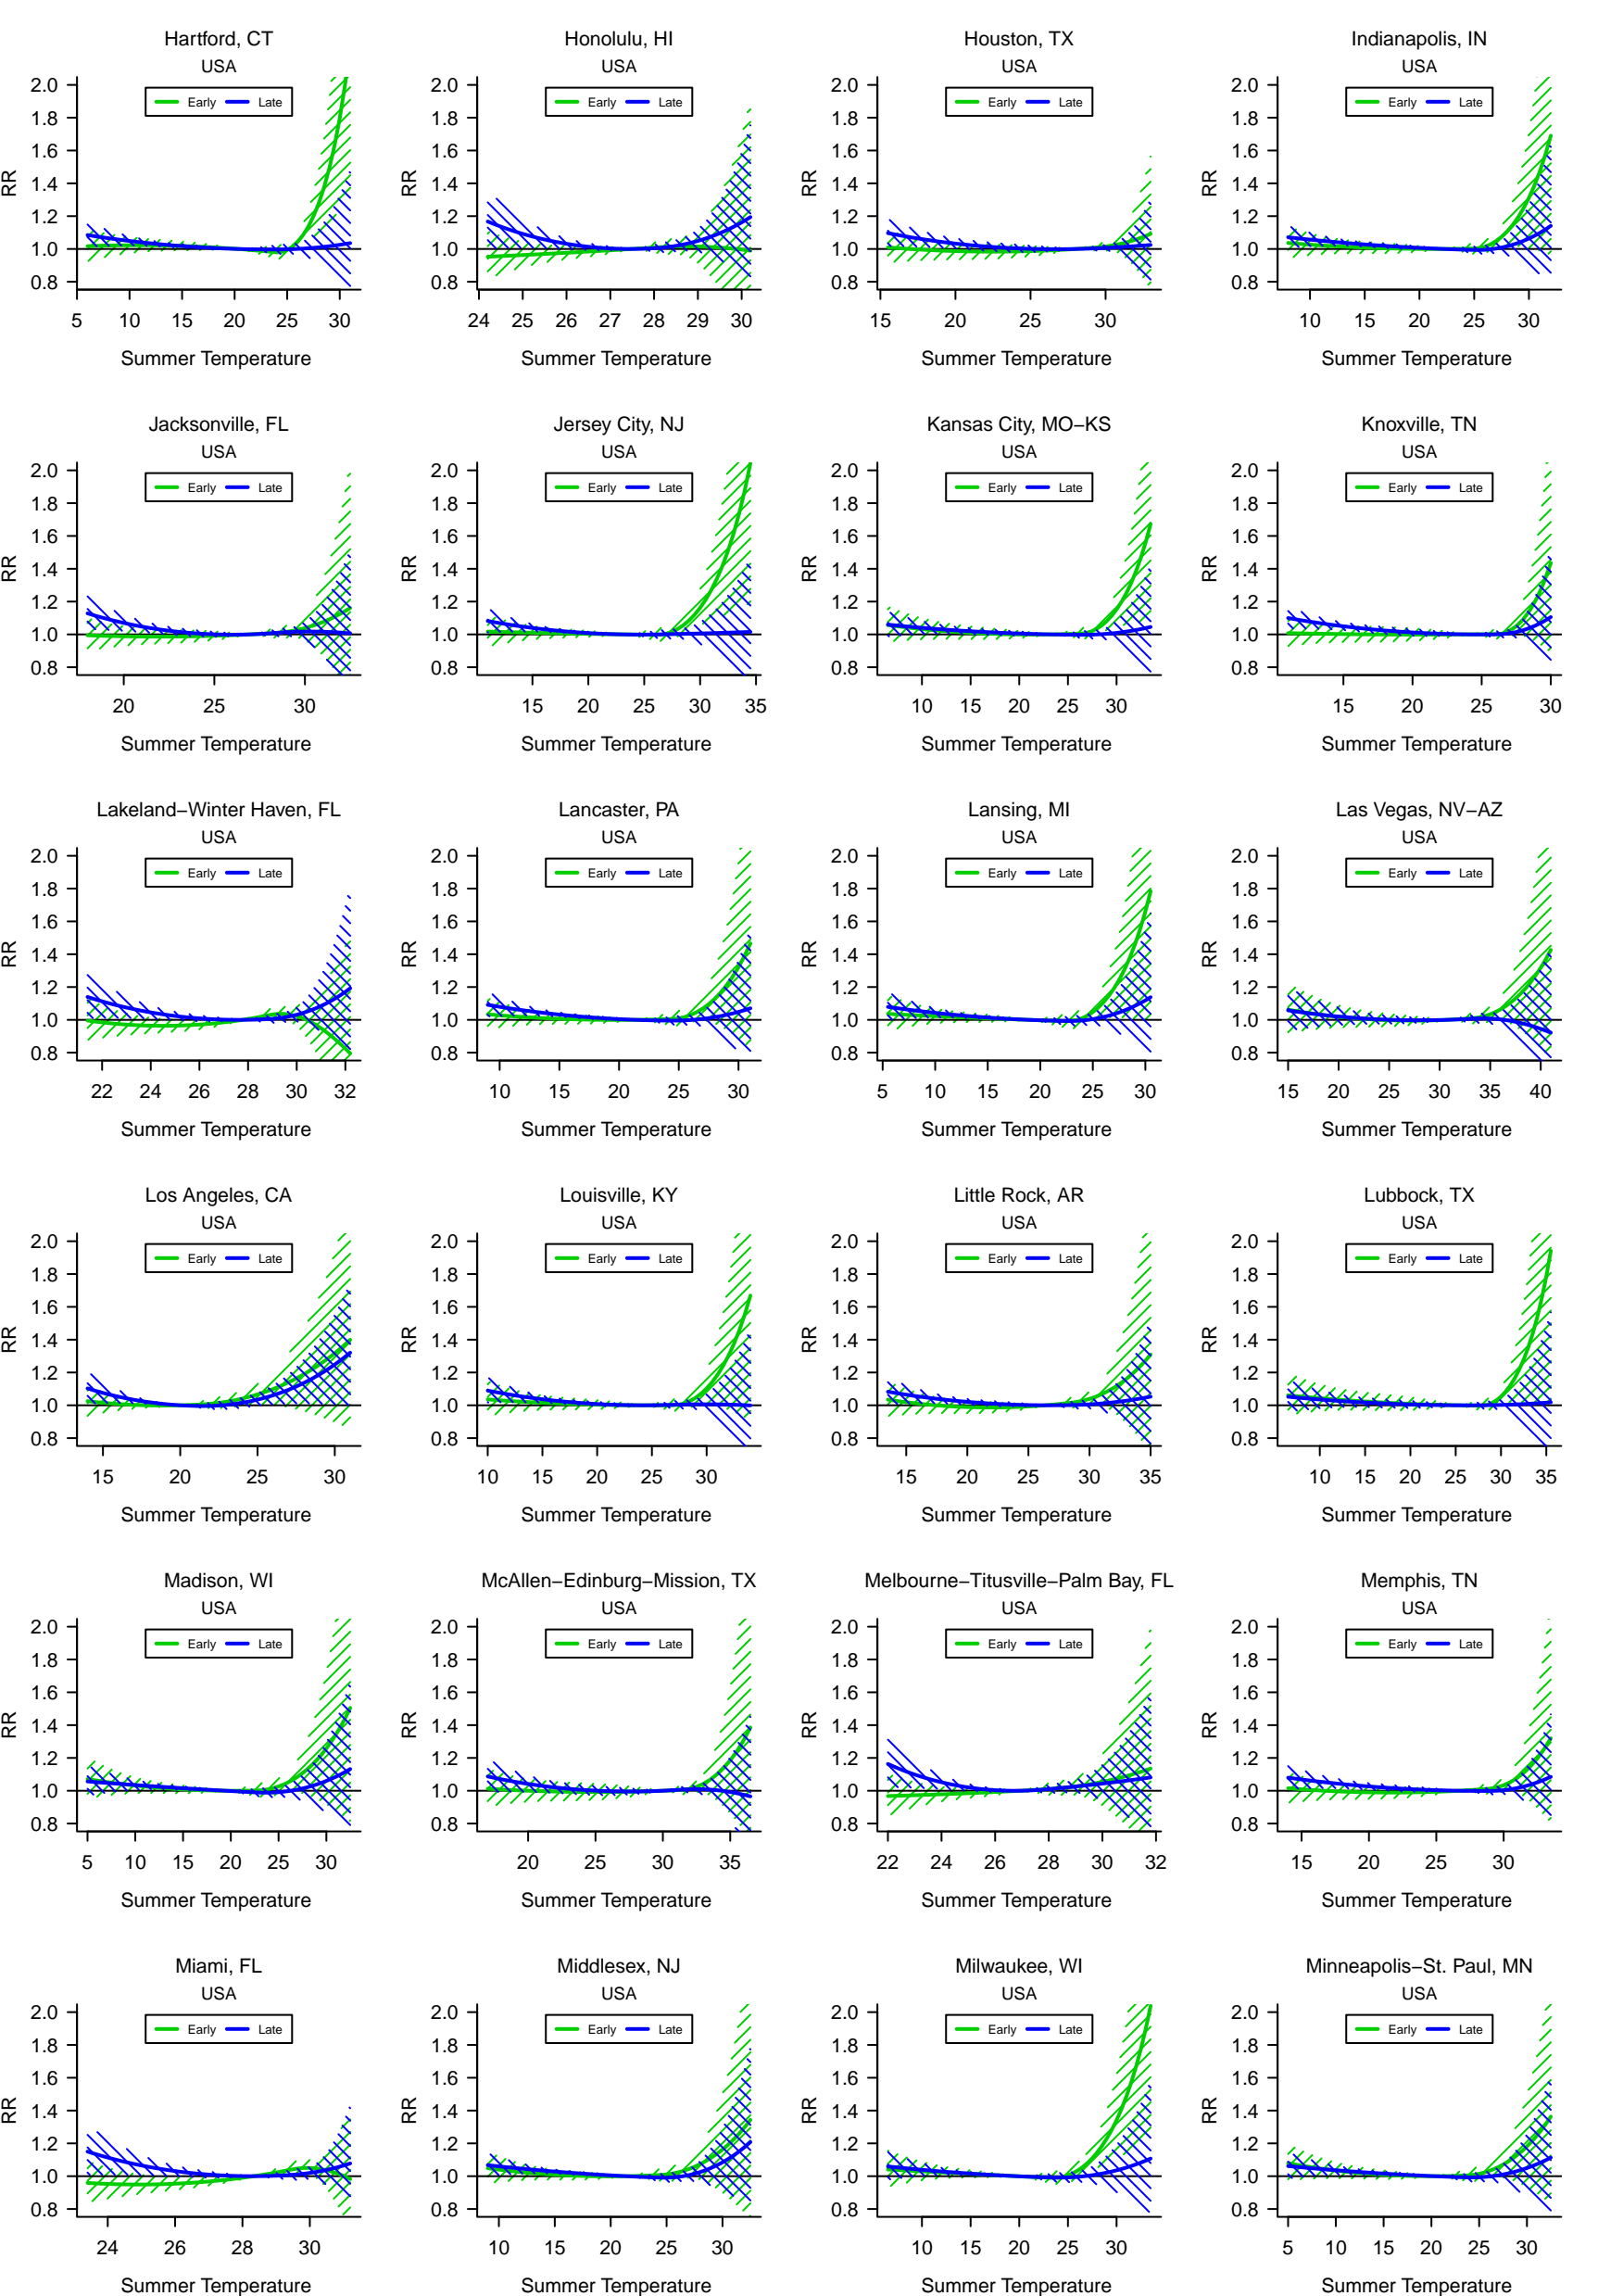

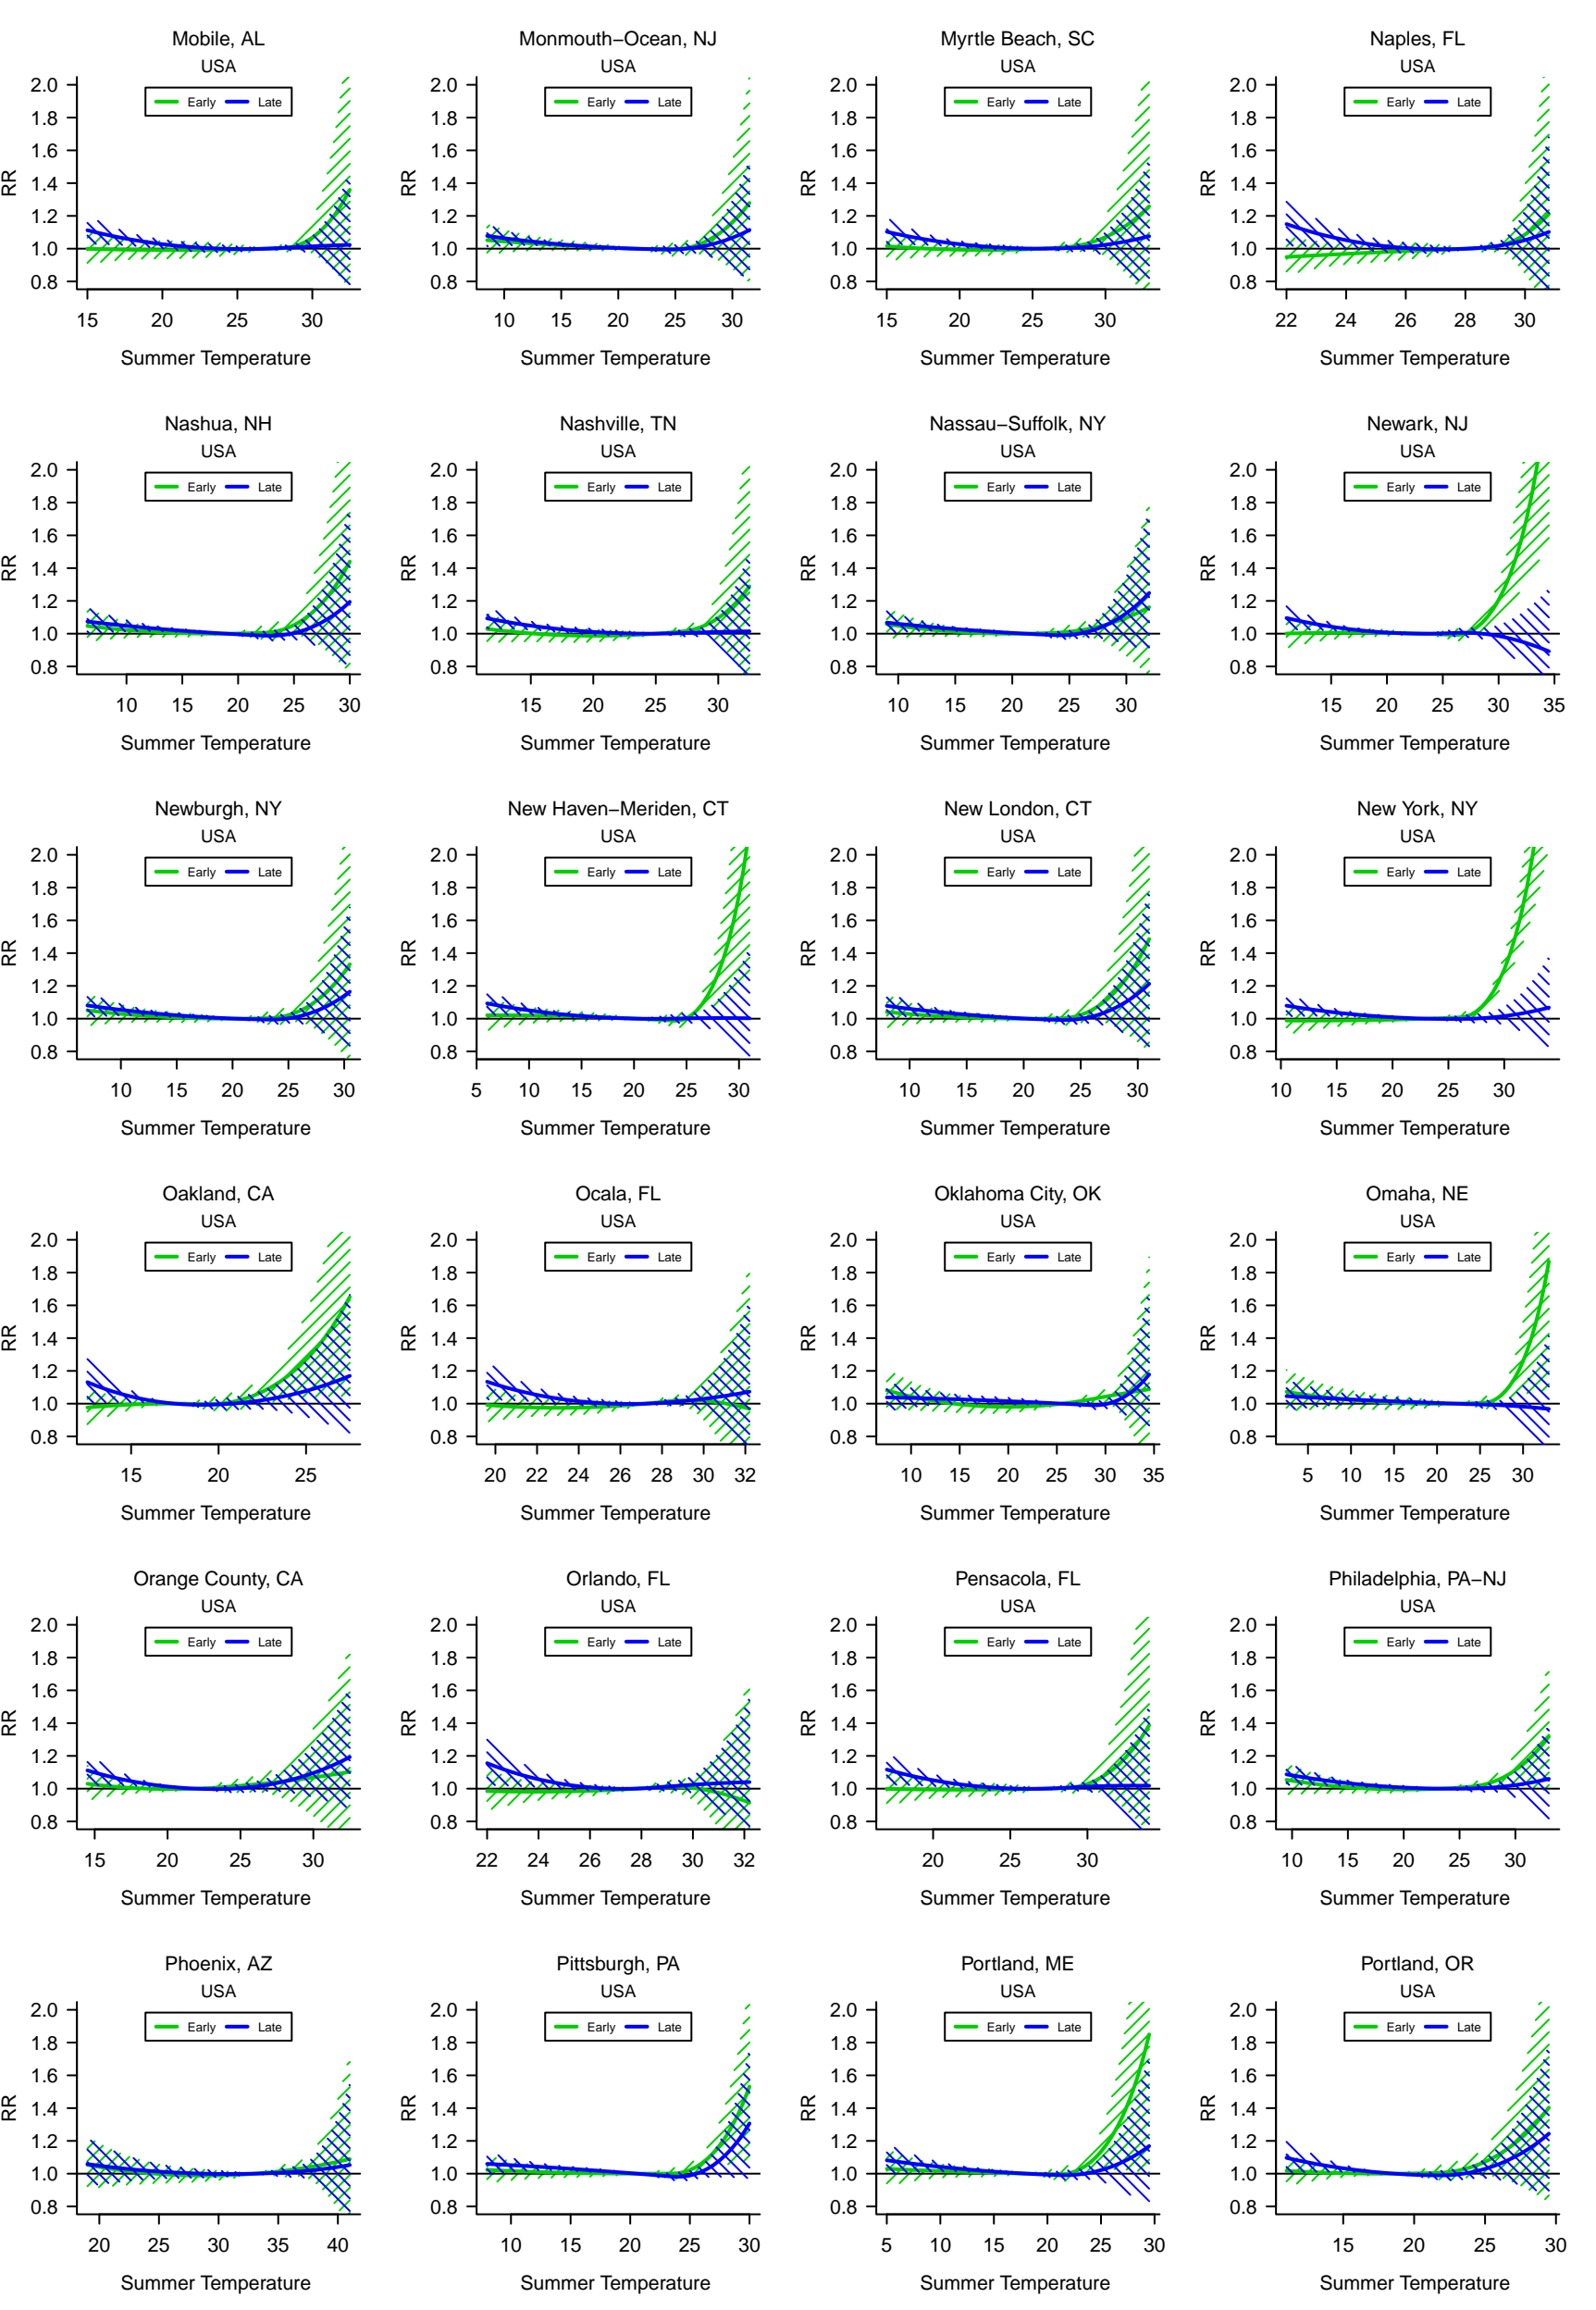

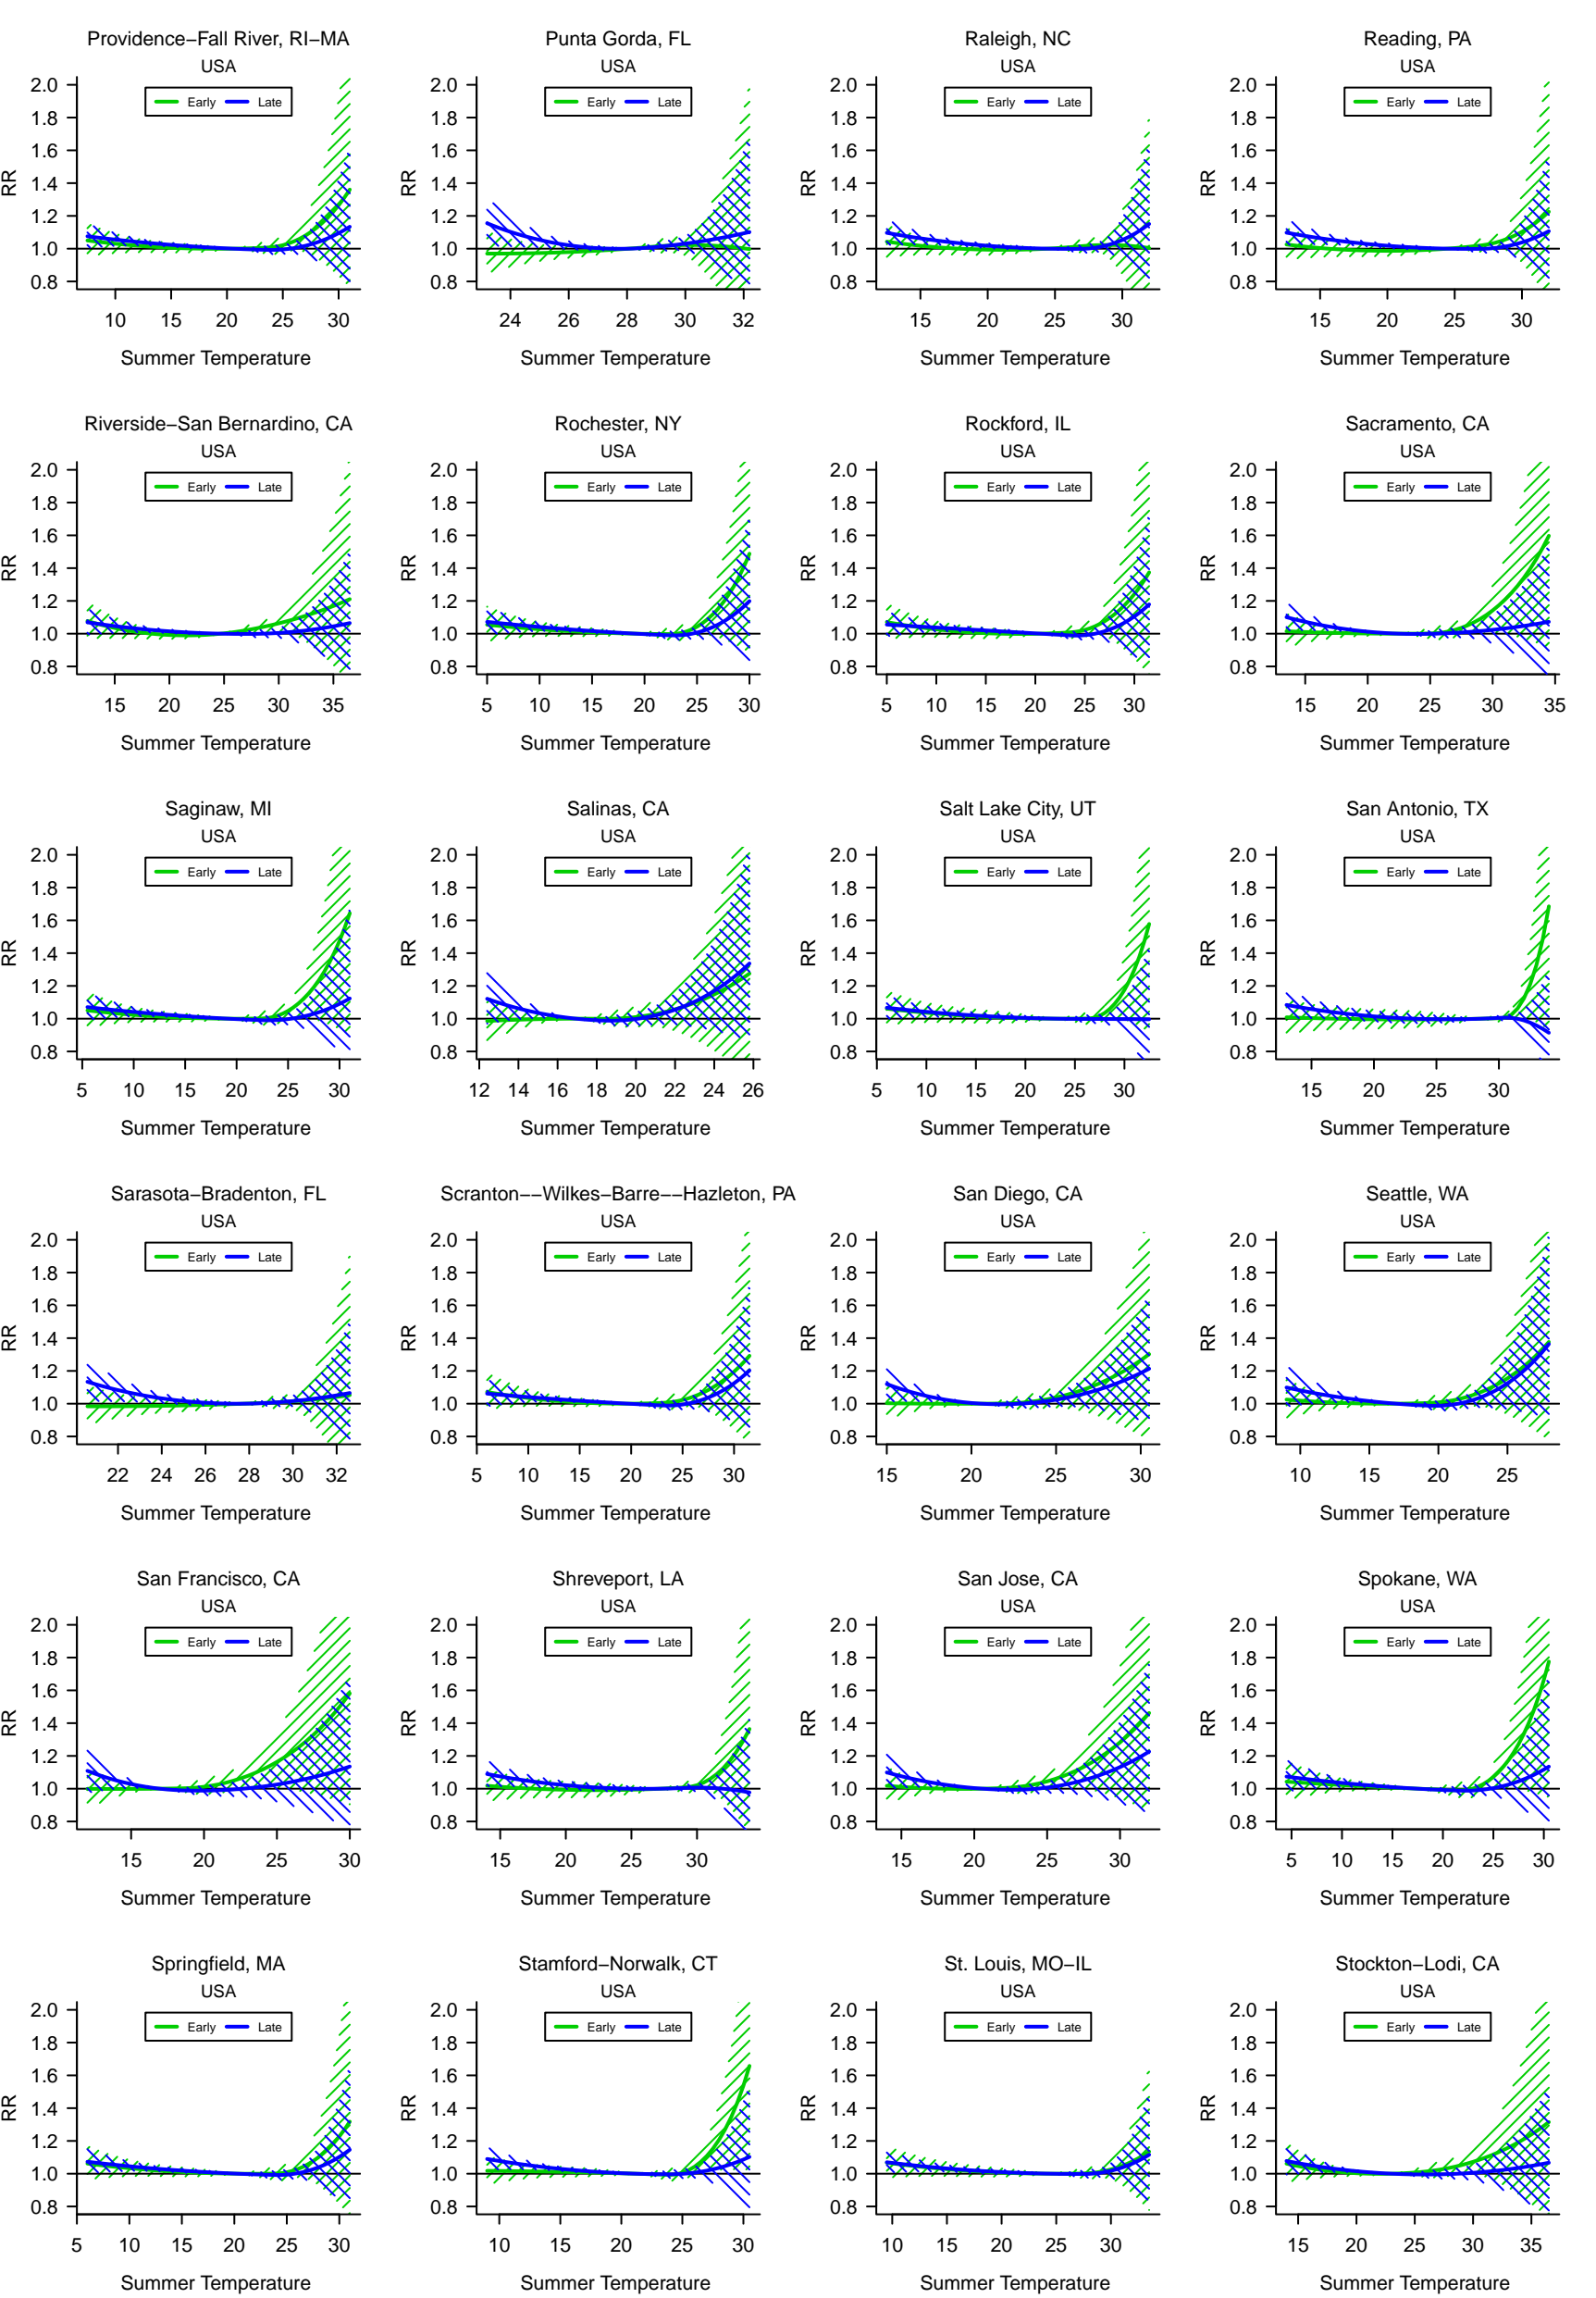

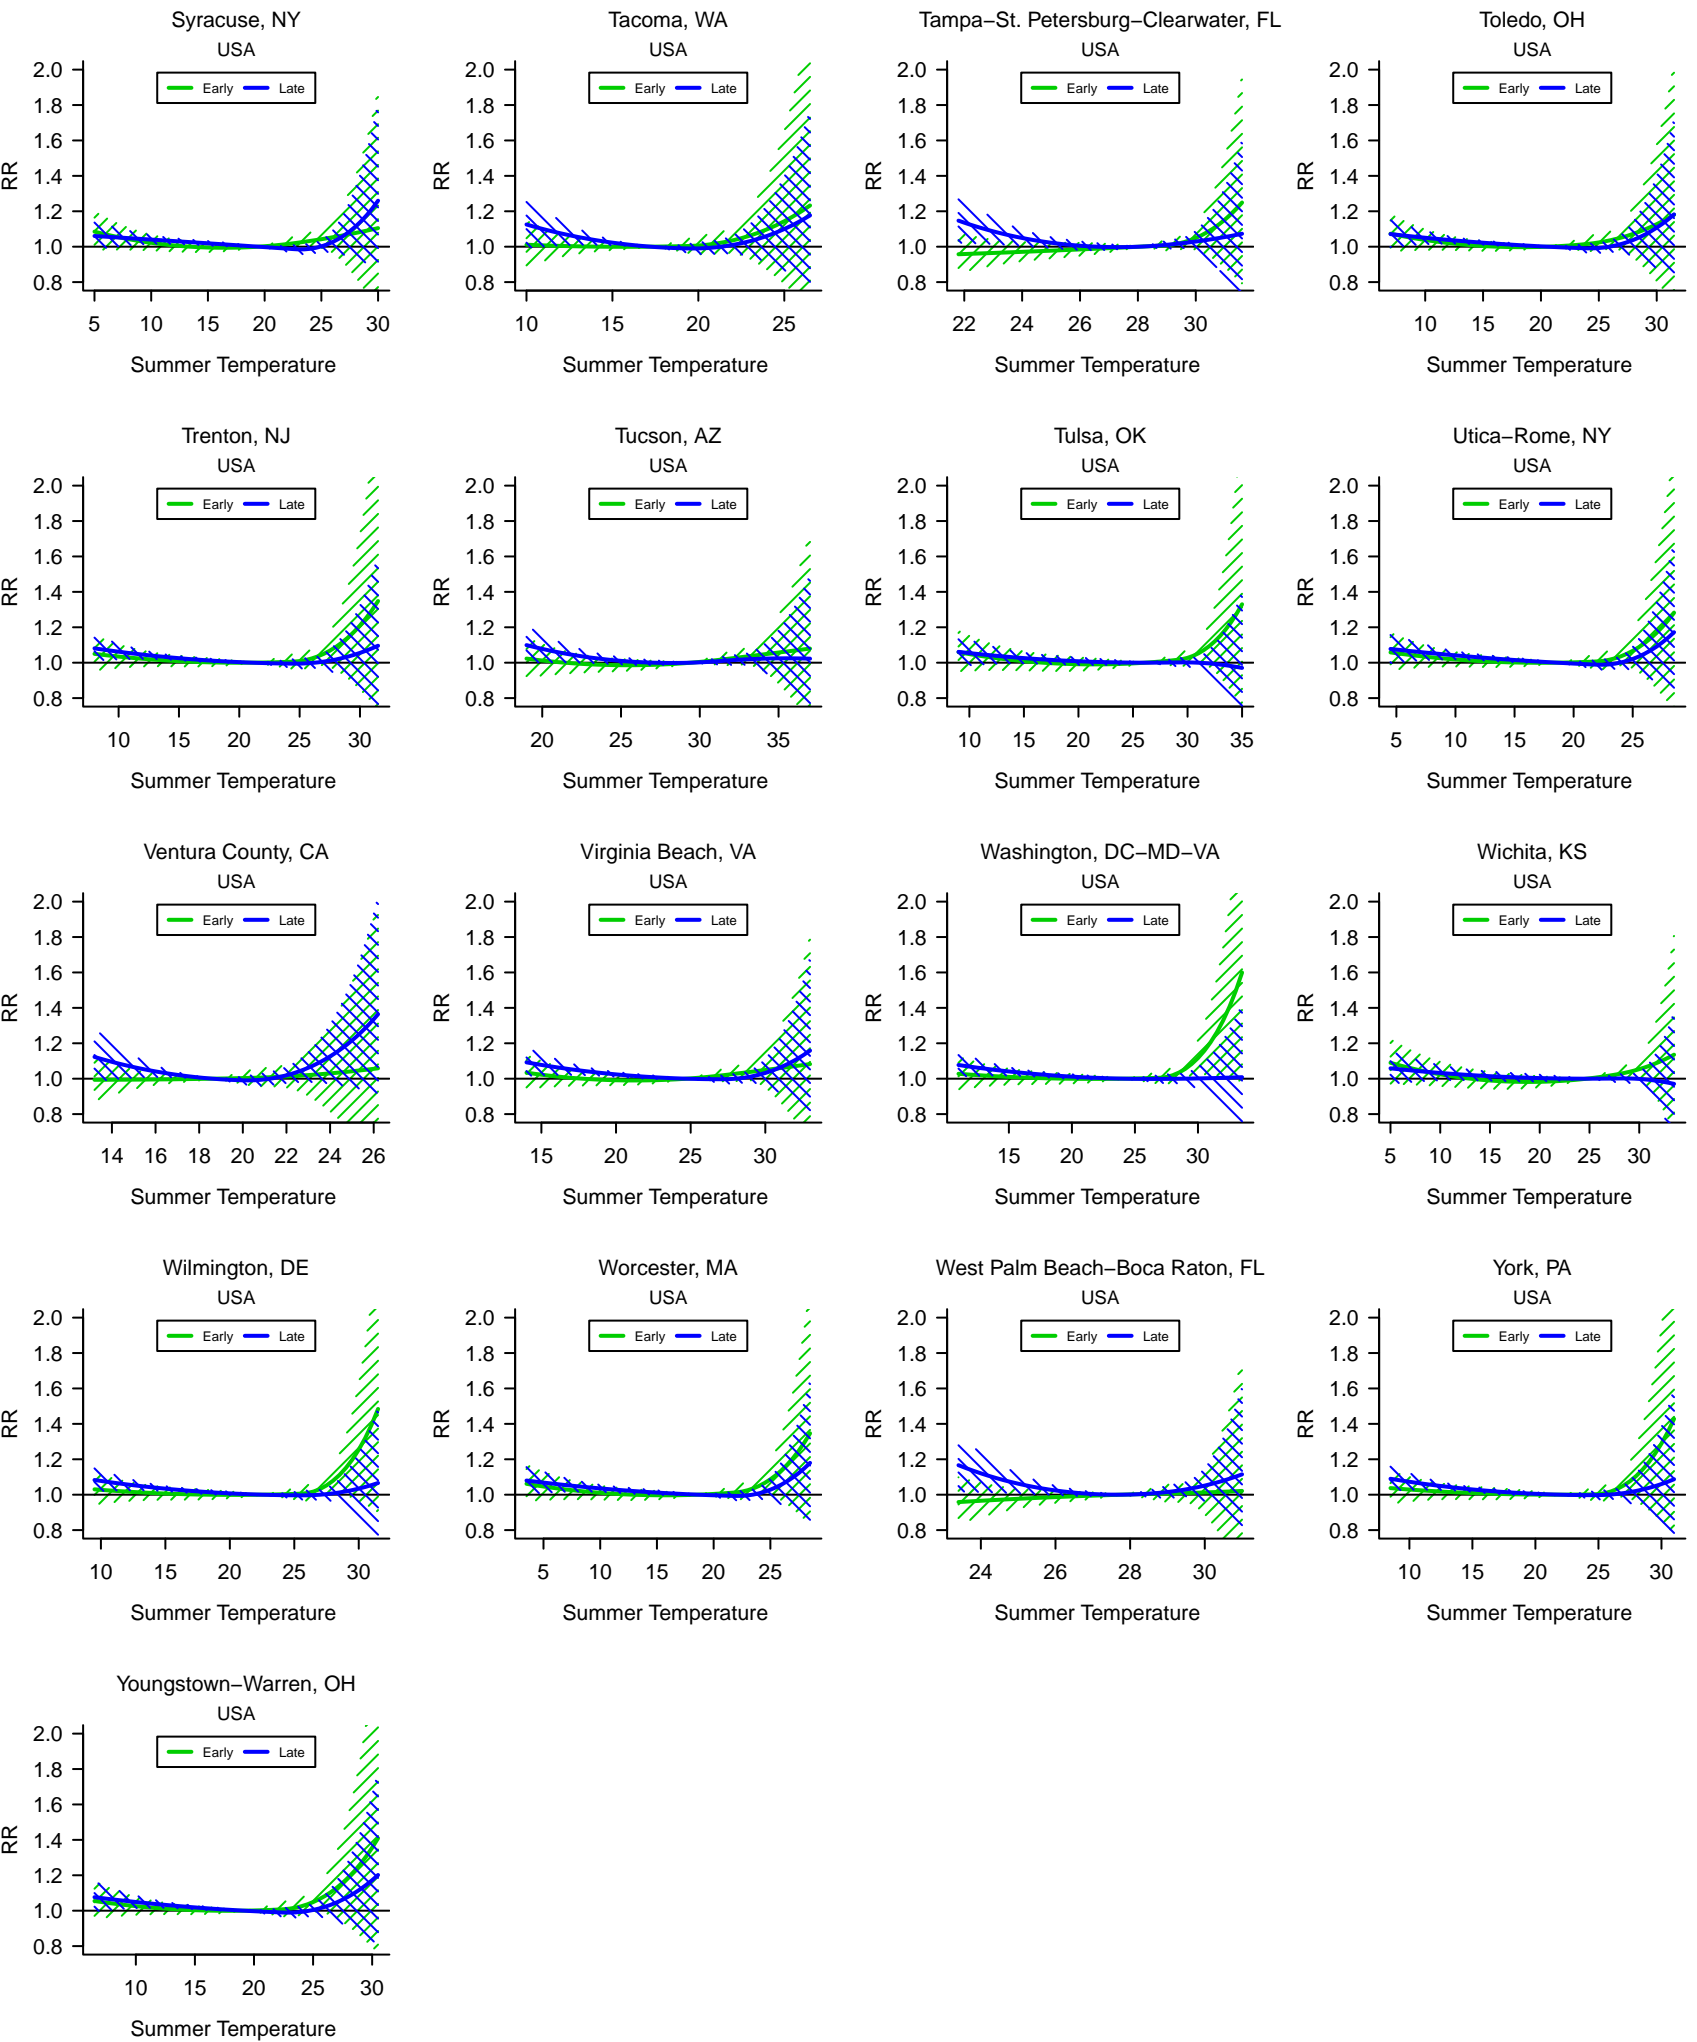

**Web Figure 4.** Effect modification of day of season on the overall cumulative exposure-response relationships between heat and mortality in 9 countries, expressed as late/early ratio of RRs (corresponding to the mid-point of the last and first summer months, respectively), with 95% confidence intervals. The curves are represented on a relative scale of summer temperature percentiles, using country-specific distributions. The vertical lines represent the average minimum mortality percentile (dotted) and the 90<sup>th</sup> and 99<sup>th</sup> percentiles of the temperature distribution (dashed). Note that the y-axis is scaled to the country-specific range.

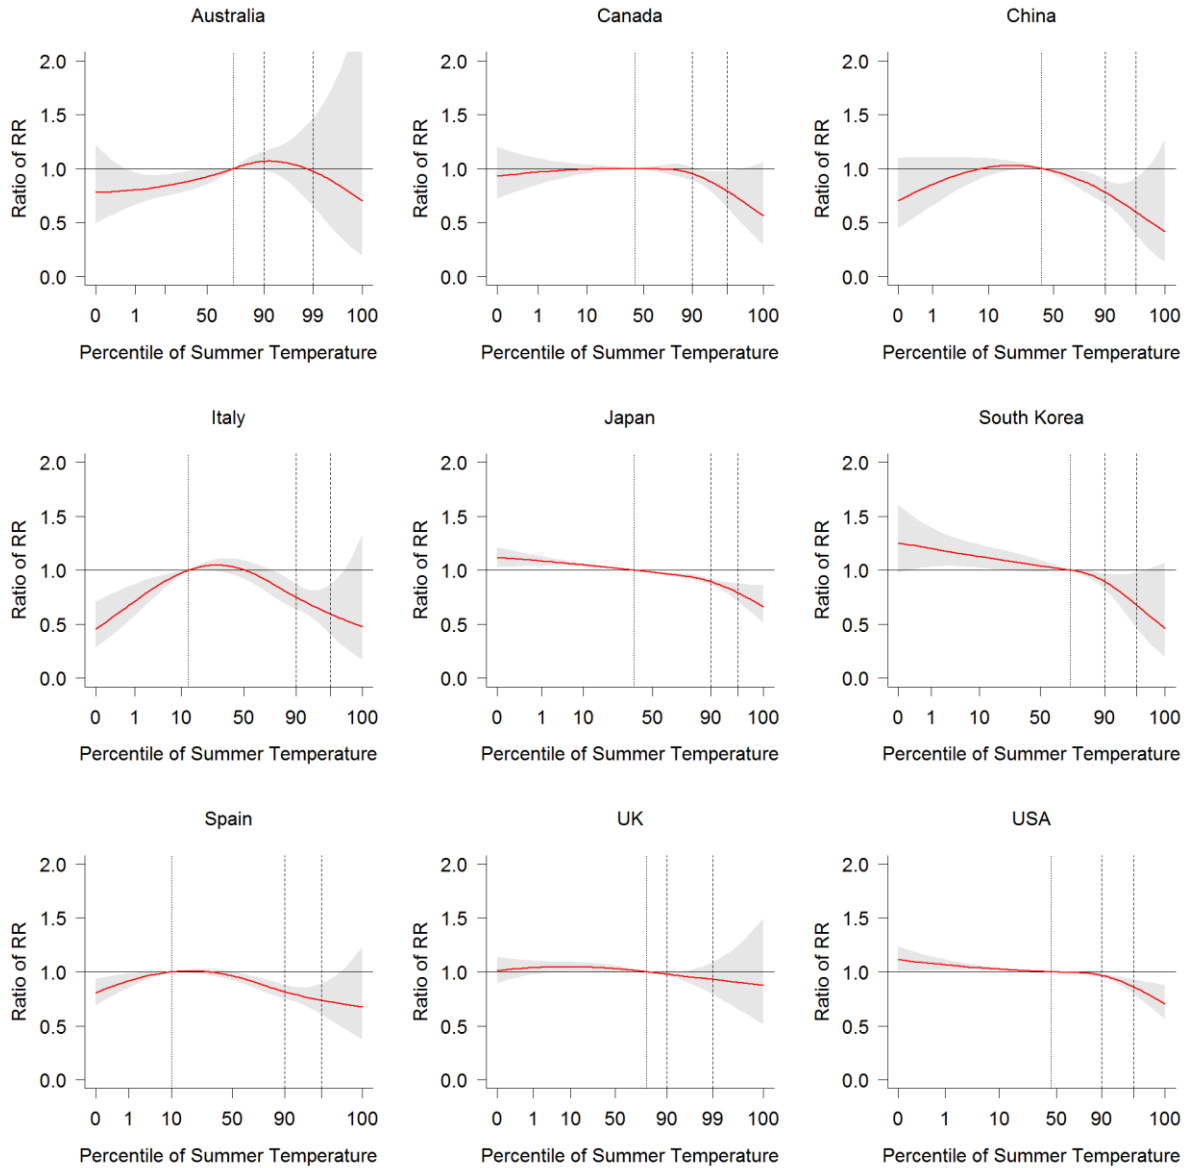

**Web Figure 5.** Replication of Figure 3 in the manuscript, including colours and confidence intervals as shaded areas.

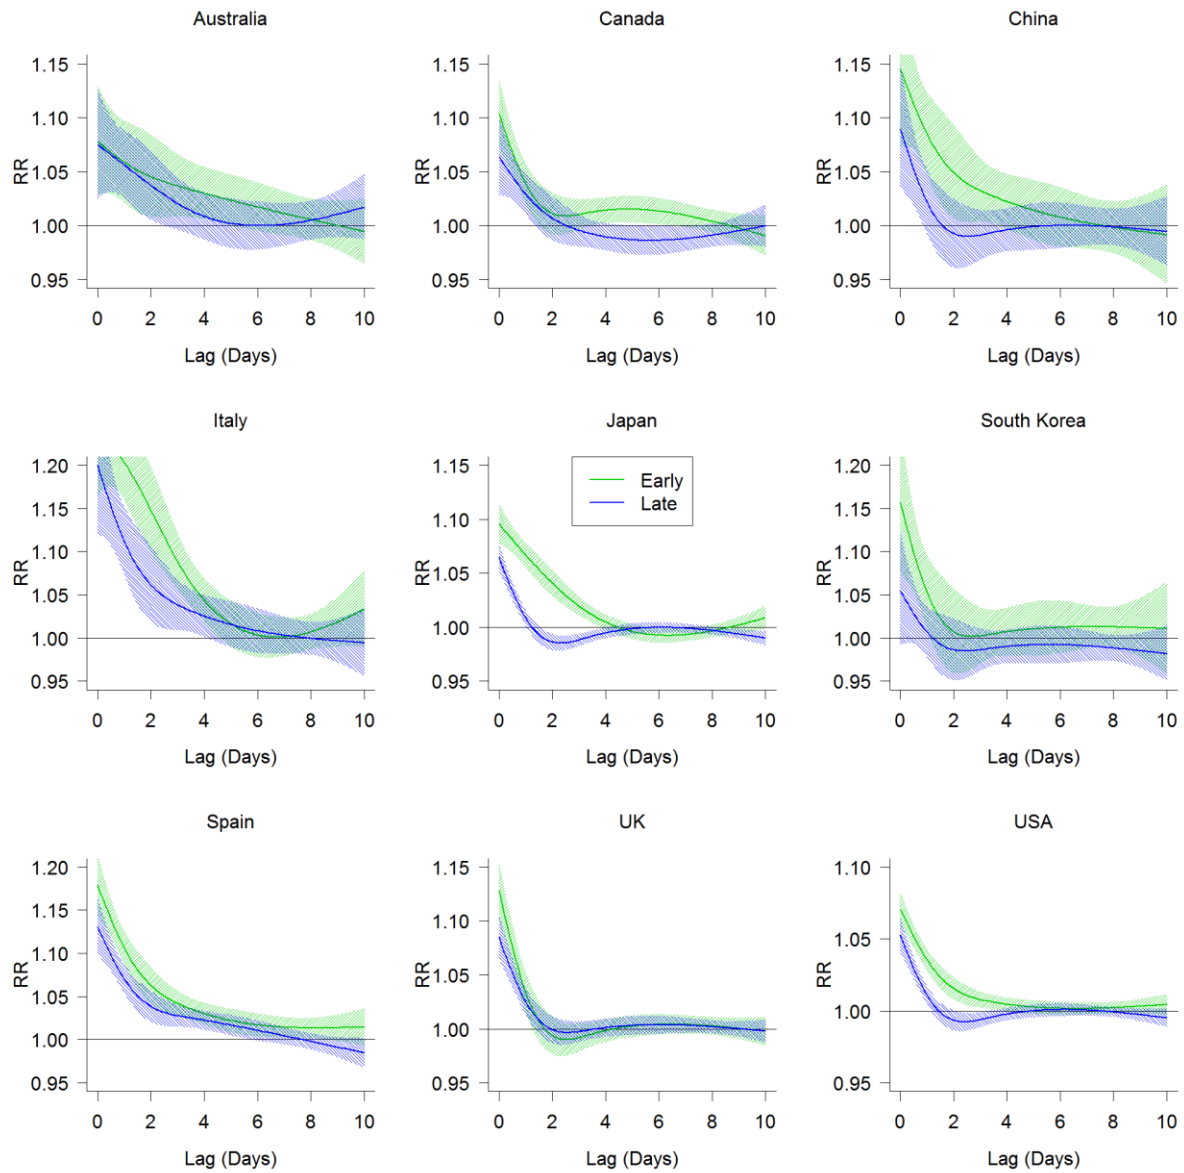

**Web Figure 6.** Replication of Figure 3 in the manuscript for the average across the summer, with confidence intervals as grey areas.

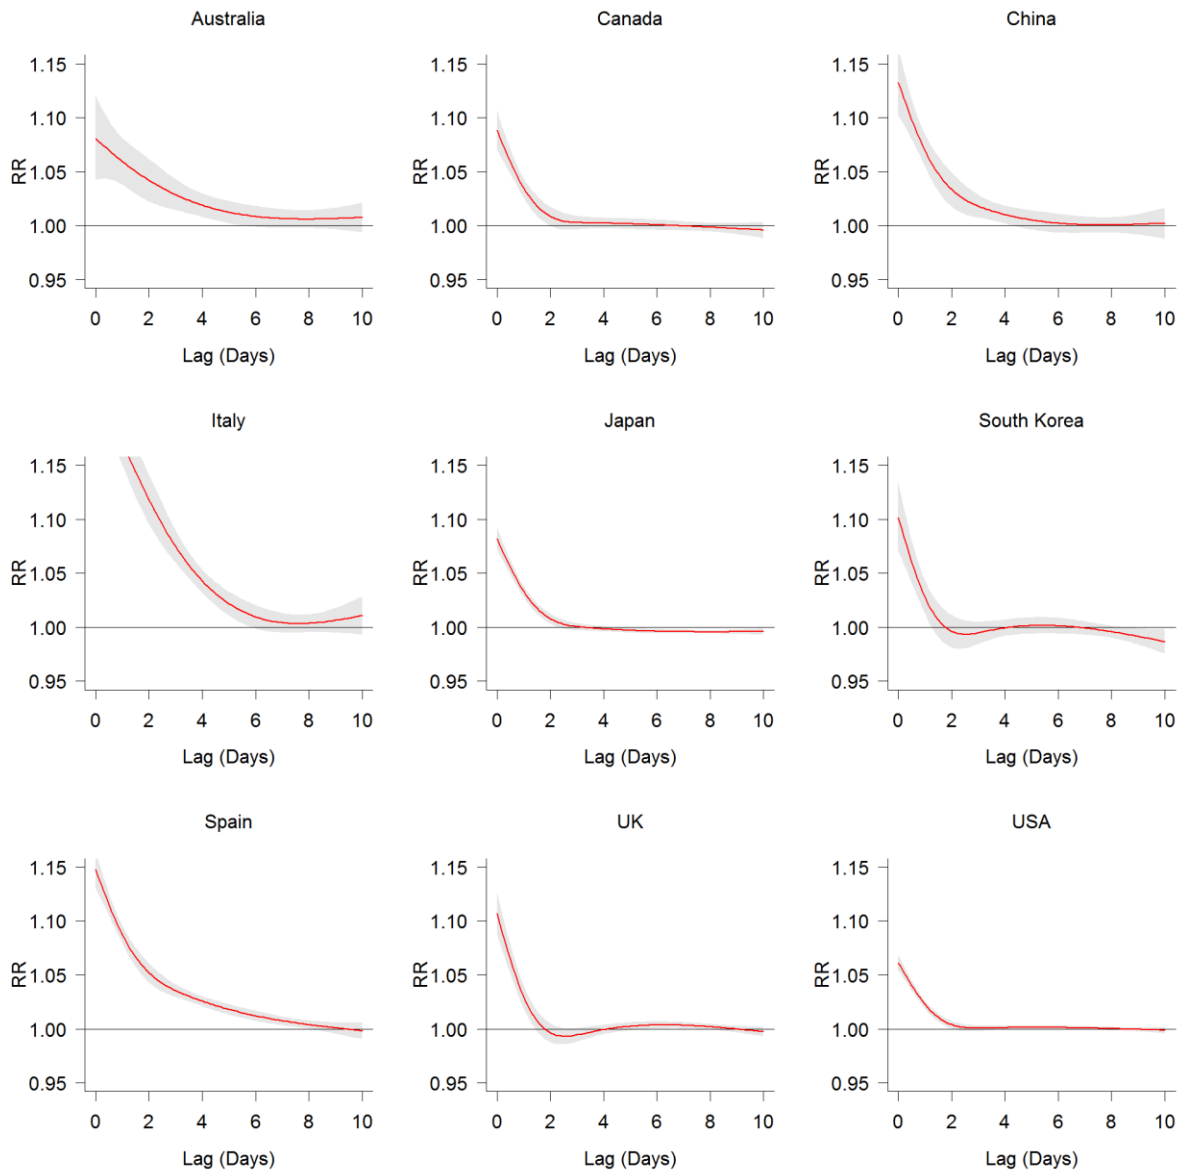



**Web Figure 7.** Replication of Figure 3 in the manuscript using a quadratic B-spline function with 2 df (no knots) as the exposure-response function.

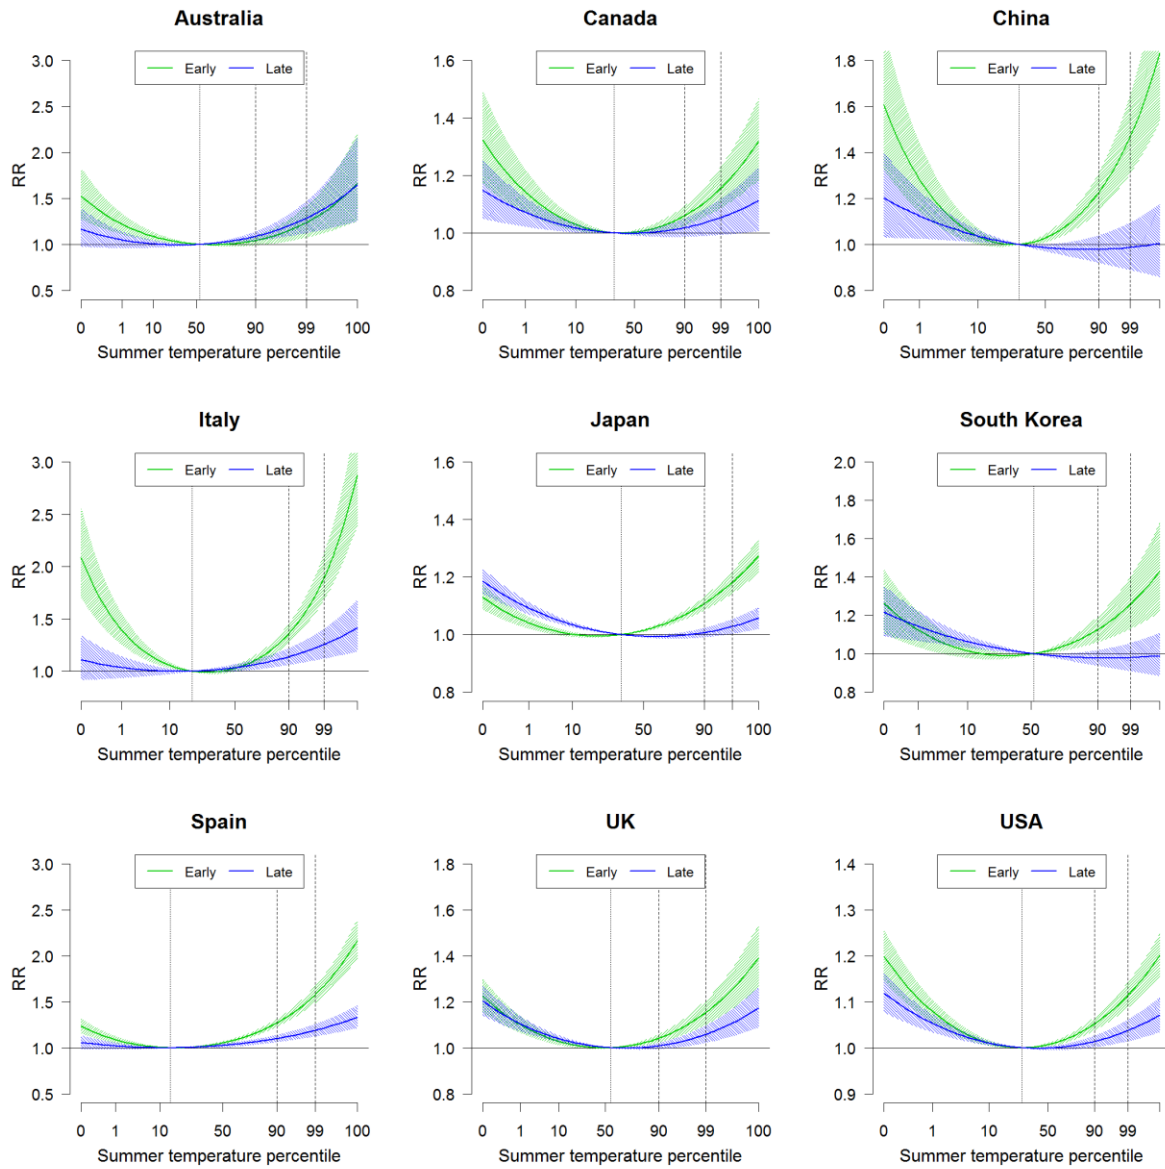

**Web Figure 8.** Replication of Figure 3 in the manuscript using a quadratic B-spline function with 4 df (knots at the 50<sup>th</sup> and 90<sup>th</sup> percentile of summer temperature distribution) as the exposure-response function.

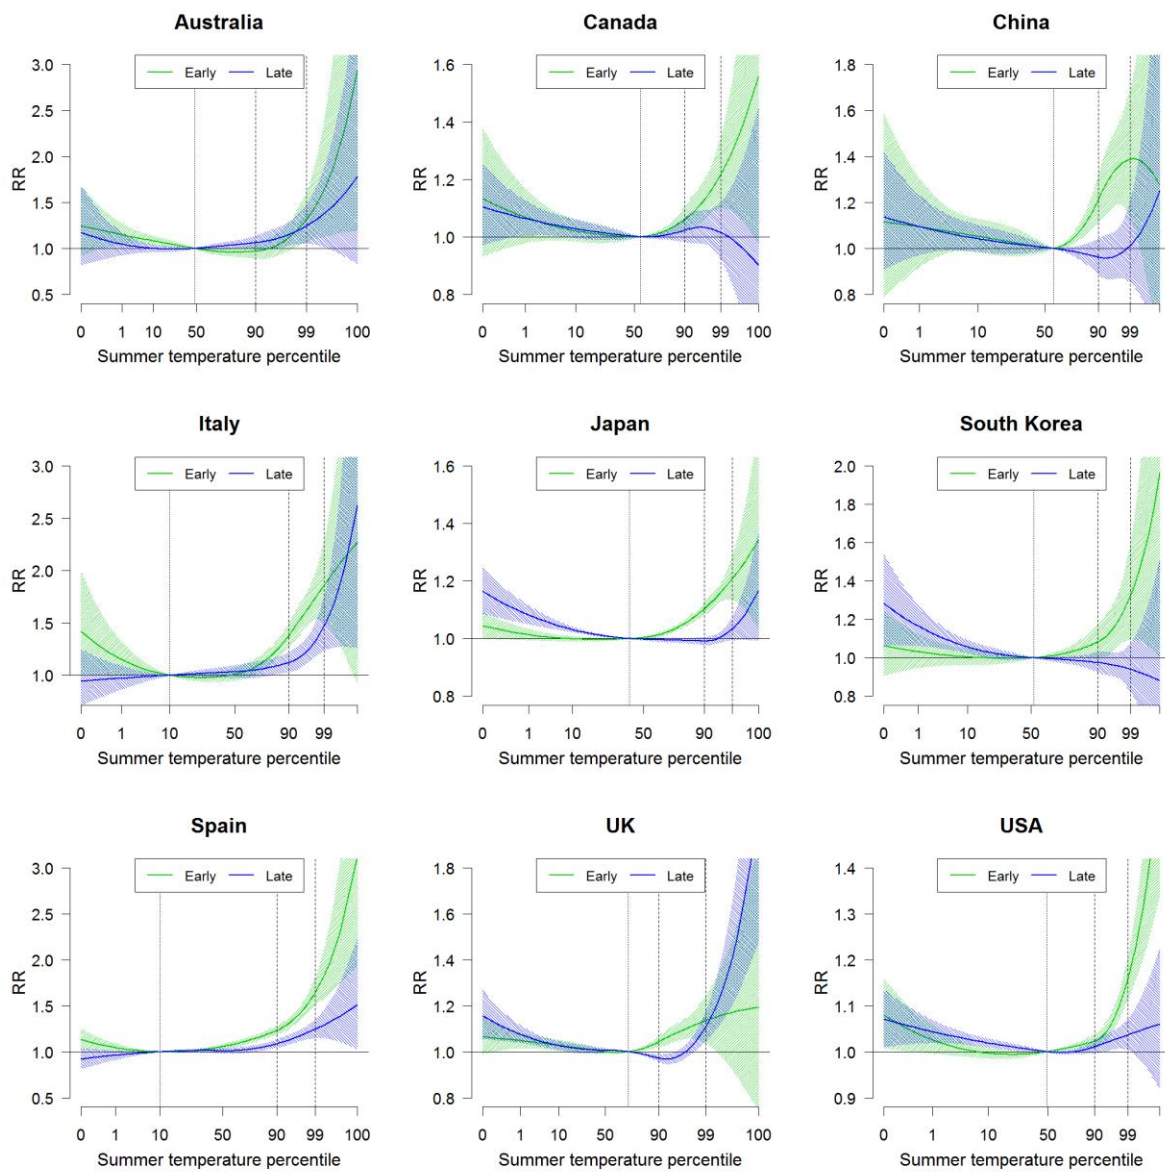

**Web Figure 9.** Replication of Figure 3 in the manuscript (excluding confidence intervals), with and without control for relative humidity, modelled using a natural cubic B-spline function with 3 df of the average over lag 0-1. The analysis is performed in the subset of 223 locations including at least 80% of daily measurement of relative humidity.

<sup>a</sup>The curves are represented on a relative scale of summer temperature percentiles, using country-specific distributions.

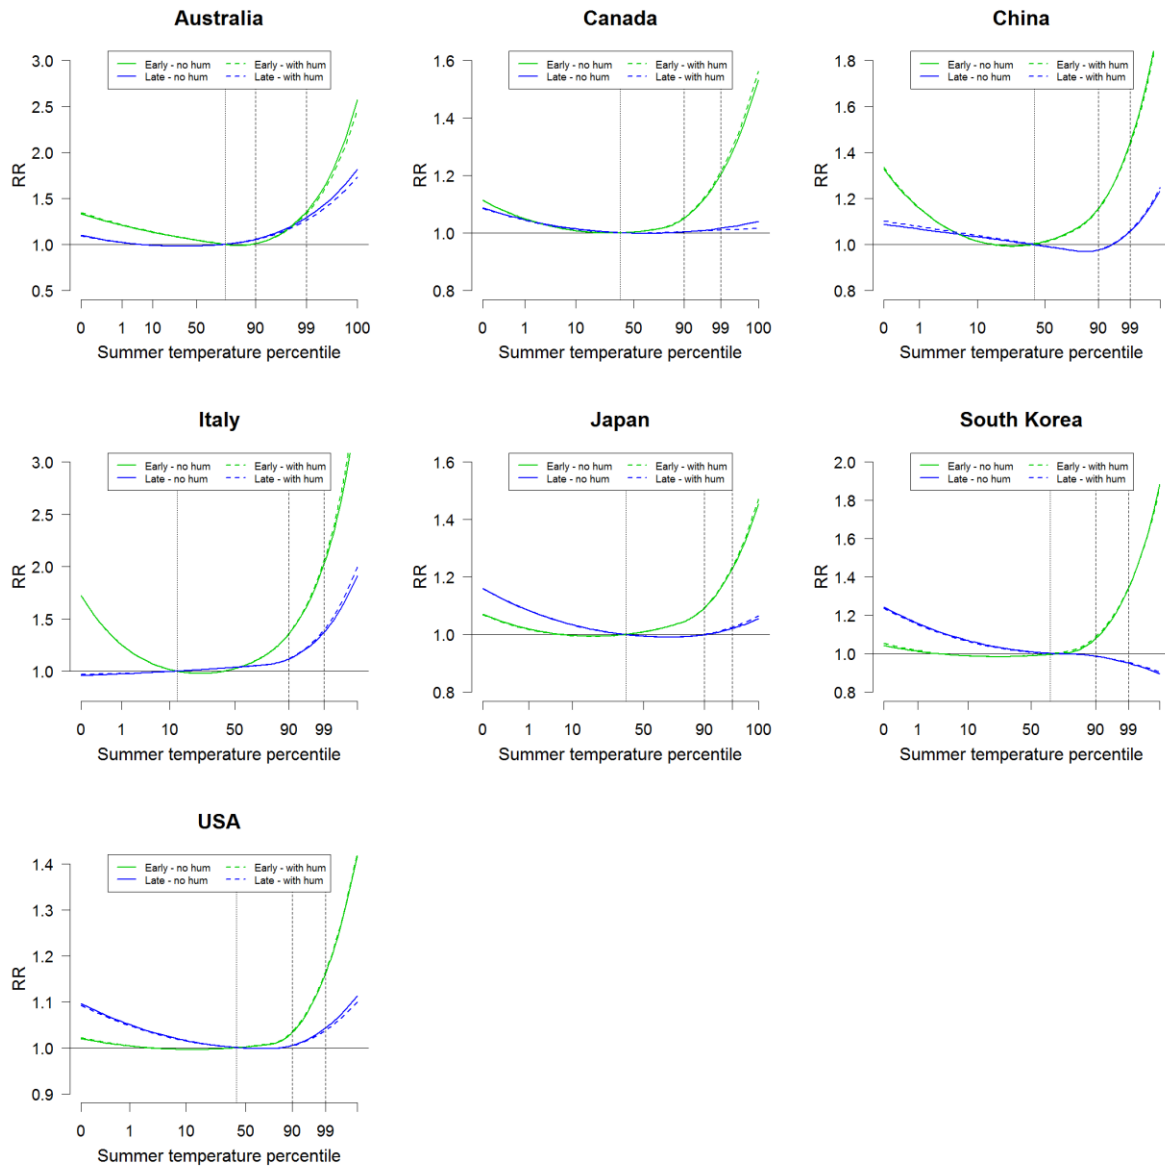

**Web Figure 10.** Replication of Figure 3 in the manuscript (excluding confidence intervals), with and without control for diurnal temperature range (DTR). The analysis is performed in the subset of 273 locations including at least 80% of daily measurement of maximum and minimum daily temperature.

<sup>a</sup>The curves are represented on a relative scale of summer temperature percentiles, using country-specific distributions.

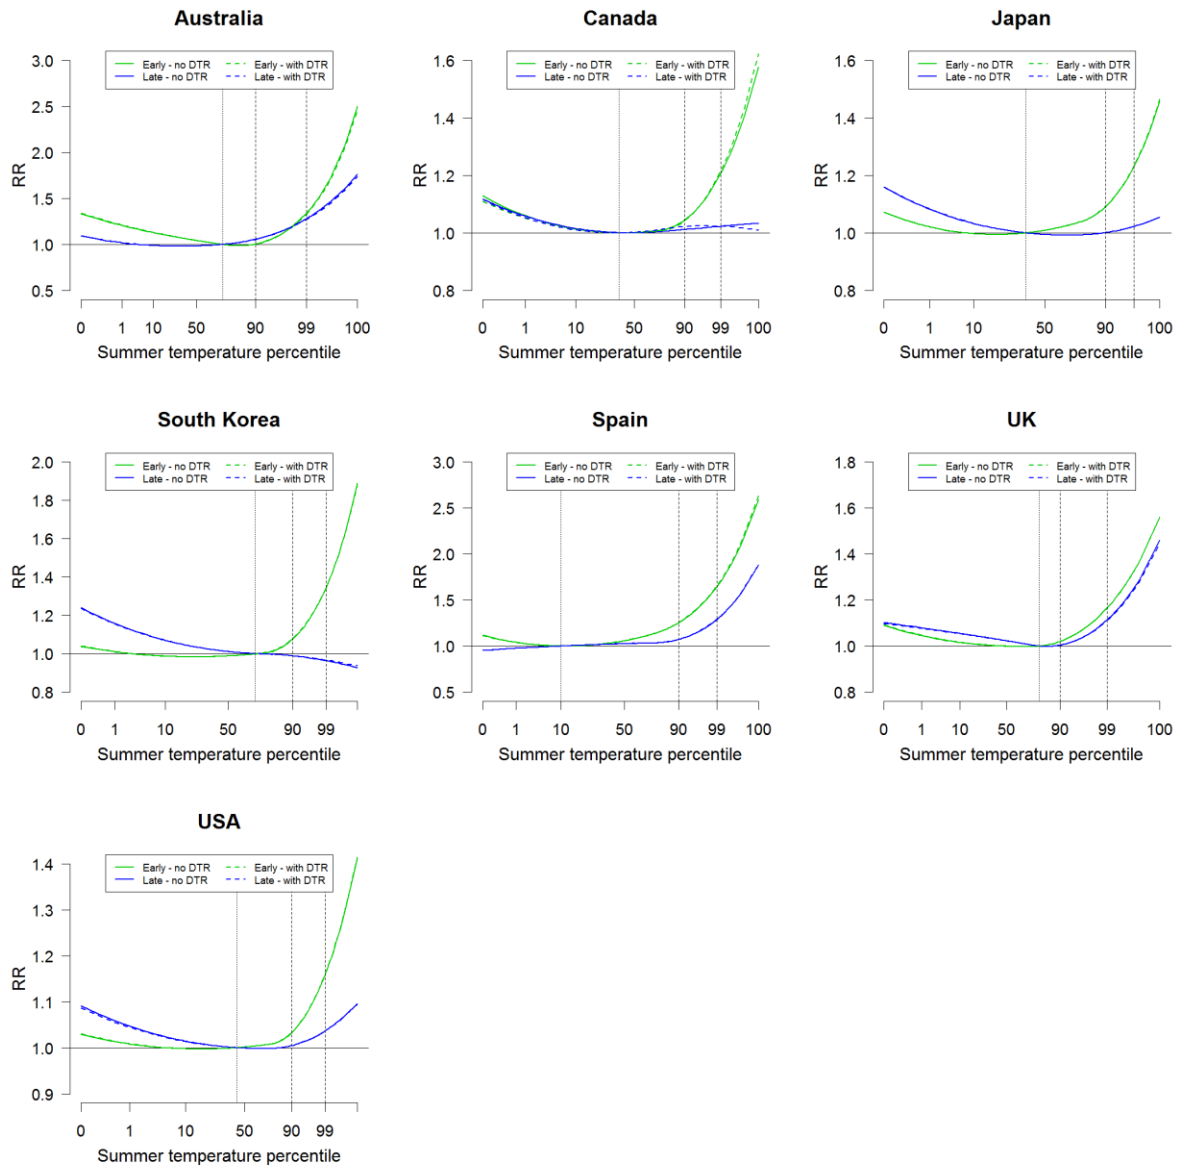

## References

1. Tong S, Wang XY, Guo Y. Assessing the short-term effects of heatwaves on mortality and morbidity in Brisbane, Australia: comparison of case-crossover and time series analyses. *PloS One* 2012;7(5):e37500.
2. Tong S, Wang XY, Yu W, et al. The impact of heatwaves on mortality in Australia: a multicity study. *BMJ Open* 2014;4(2):e003579.
3. Gasparrini A, Guo Y, Hashizume M, et al. Mortality risk attributable to high and low ambient temperature: a multicountry observational study. *The Lancet* 2015;386(9991):369-375.
4. Gasparrini A, Guo Y, Hashizume M, et al. Temporal variation in heat-mortality associations: a multi-country study. *Environmental Health Perspectives* 2015; May 1 [Epub ahead of print]. DOI: 10.1289/ehp.1409070.
5. Kaplan GG, Tanyingoh D, Dixon E, et al. Ambient ozone concentrations and the risk of perforated and nonperforated appendicitis: a multicity case-crossover study. *Environmental Health Perspectives* 2013;121(8):939-943.
6. Martin SL, Cakmak S, Hebborn CA, et al. Climate change and future temperature-related mortality in 15 Canadian cities. *International Journal of Biometeorology* 2012;56(4):605-619.
7. Michelozzi P, de'Donato FK, Bargagli AM, et al. Surveillance of summer mortality and preparedness to reduce the health impact of heat waves in Italy. *International Journal of Environmental Research and Public Health* 2010;7(5):2256-2273.
8. Schifano P, Leone M, De Sario M, et al. Changes in the effects of heat on mortality among the elderly from 1998--2010: results from a multicenter time series study in Italy. *Environ Health* 2012;11(1):58.
9. Tobias A, Armstrong B, Zuza I, et al. Mortality on extreme heat days using official thresholds in Spain: a multi-city time series analysis. *BMC Public Health* 2012;12(1):133.
10. Armstrong BG, Chalabi Z, Fenn B, et al. The association of mortality with high temperatures in a temperate climate: England and Wales. *Journal of Epidemiology and Community Health* 2011;65(4):340-345.
11. Gasparrini A, Armstrong B, Kovats S, et al. The effect of high temperatures on cause-specific mortality in England and Wales. *Occupational and Environmental Medicine* 2012;69(1):56-61.
12. Zanobetti A, O'Neill MS, Gronlund CJ, et al. Susceptibility to mortality in weather extremes: effect modification by personal and small-area characteristics. *Epidemiology* 2013;24(6):809-819.
13. Zanobetti A, Schwartz J. The effect of fine and coarse particulate air pollution on mortality: a national analysis. *Environmental Health Perspectives* 2009;117(6):898-903.
14. R Core Team. R: A Language and Environment for Statistical Computing. Vienna, Austria: R Foundation for Statistical Computing, 2015.
15. Gasparrini A. Distributed lag linear and non-linear models in R: the package dlnm. *Journal of Statistical Software* 2011;43(8):1-20.
16. Gasparrini A, Armstrong B, Kenward MG. Multivariate meta-analysis for non-linear and other multi-parameter associations. *Statistics in Medicine* 2012;31(29):3821-3839.
